# Supplementary material for: 6-Polyamino-substituted quinolines: synthesis and multiple metal (CuII, HgIIand ZnII) monitoring in aqueous media
Source: Royal Society of Chemistry journal article supplement (doi:10.1039/c9ob00259f), 2019-01-01
Supplement: c9ob00259f1.pdf [file c9ob00259f1.pdf]

## Supporting information

### Table of contents

|                                                                                |    |
|--------------------------------------------------------------------------------|----|
| 1. Investigation of excimer formation by compounds <b>5</b> and <b>6</b>       | 2  |
| 2. Protonation studies of compounds <b>5</b> , <b>6</b> and <b>10</b>          | 3  |
| 2.1. Spectrophotometric studies                                                | 3  |
| 2.2. Fluorescence studies                                                      | 9  |
| 2.3. NMR studies of the compound <b>6</b>                                      | 15 |
| 3. Metal binding studies of compounds <b>5</b> , <b>6</b> and <b>10</b>        | 17 |
| 3.1. Compound <b>10</b>                                                        | 17 |
| 3.2. Compound <b>5</b>                                                         | 19 |
| 3.3. Compound <b>6</b>                                                         | 23 |
| 3.4. Visual detection using paper stripes                                      | 31 |
| 4. Investigation of the structure of complexes                                 | 32 |
| 4.1. NMR-studies of [Zn( <b>6</b> )] <sup>2+</sup> complex                     | 32 |
| 4.2. DFT-studies of [Zn( <b>6</b> )] <sup>2+</sup> complex                     | 42 |
| 4.3. IR-studies                                                                | 46 |
| 4.4. ESI-spectra of [Hg( <b>6</b> )] <sup>2+</sup> complex                     | 47 |
| 4.5. NMR-studies of [Hg( <b>6</b> )] <sup>2+</sup> complex                     | 48 |
| 5. Detection of sulfide anions                                                 | 51 |
| 6. Characterization of compounds <b>5</b> , <b>6</b> , <b>9a-f</b> , <b>10</b> | 52 |

## 1. Investigation of excimer formation by compounds **5** and **6**

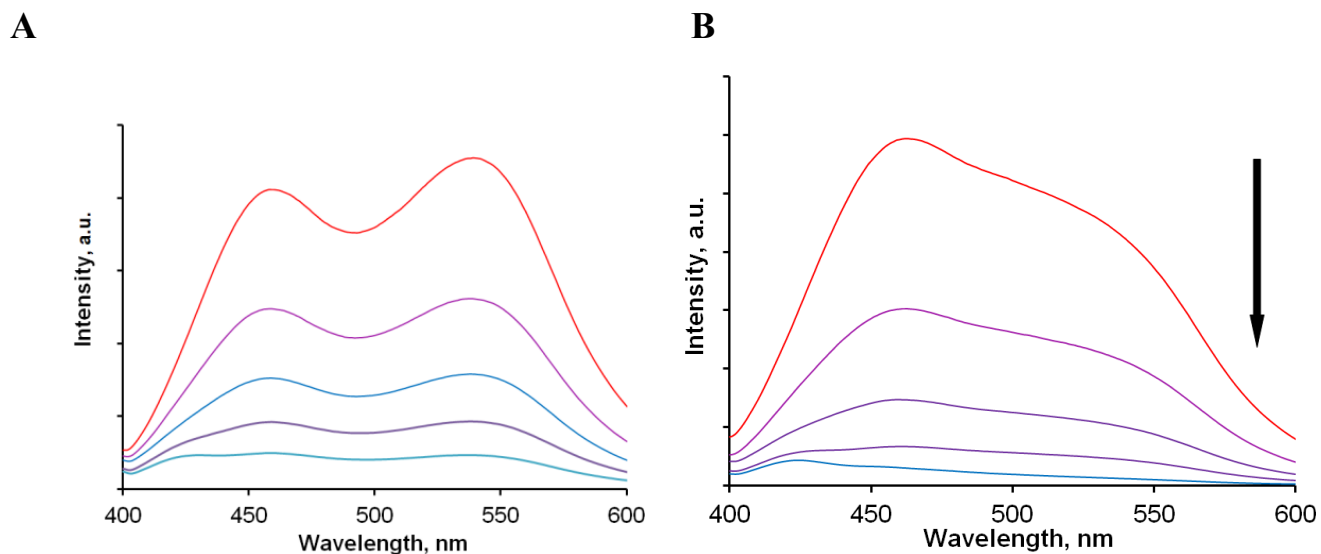

**Figure S1.** Dependence of emission spectra on dilution of the aqueous solutions of : A – ligand **5** (in the 1.7  $\mu\text{M}$ –26  $\mu\text{M}$  concentration range; 0.03M HEPES, pH = 7.4;  $\lambda_{\text{ex}}$  = 356 nm); B – ligand **6** (in the 40 nM–4.3  $\mu\text{M}$  concentration range; 0.03M HEPES, pH = 7.4;  $\lambda_{\text{ex}}$  = 365 nm).

## 2. Protonation studies of compounds 5, 6 and 10

### 2.1. Spectrophotometric studies

#### Spectrophotometric studies of protonation of compound 5

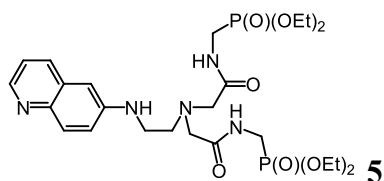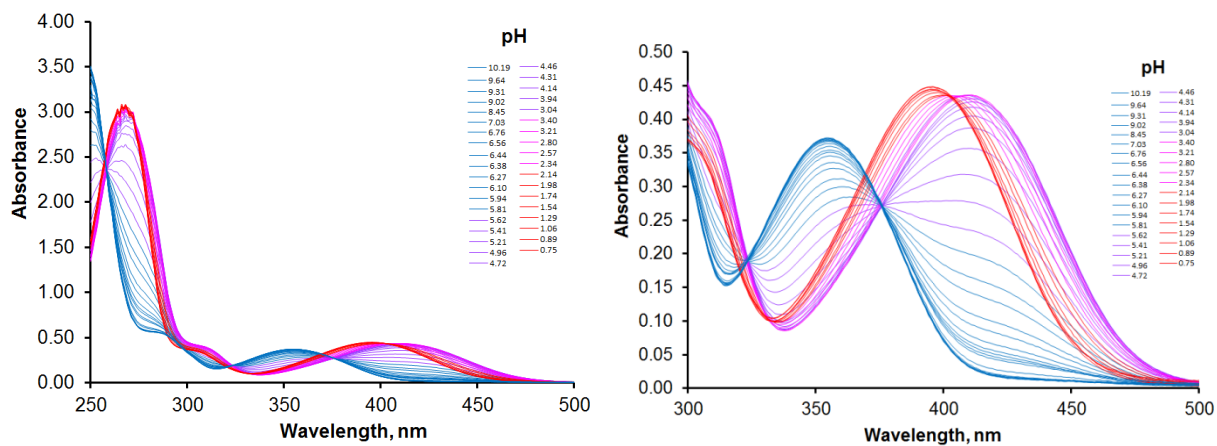

**Figure S2.** Spectrophotometric titration of **5** as a function of pH. [**5**] = 133  $\mu$ M,  $I$  = 0.1 M KCl, pH = 0.75–10.19.

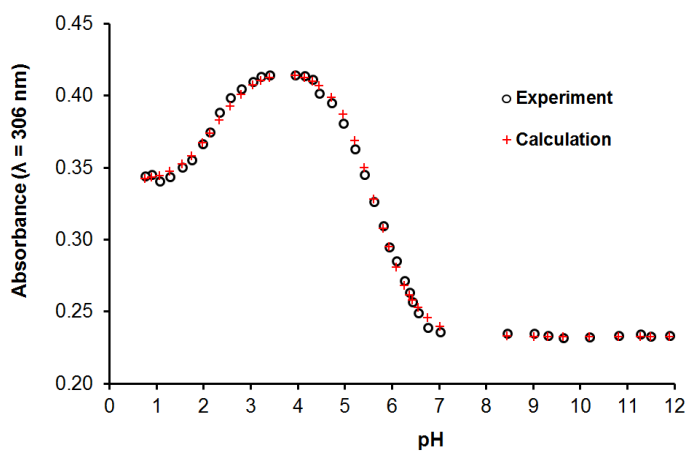

**Figure S3.** Evolution of absorbance with pH at 306 nm.

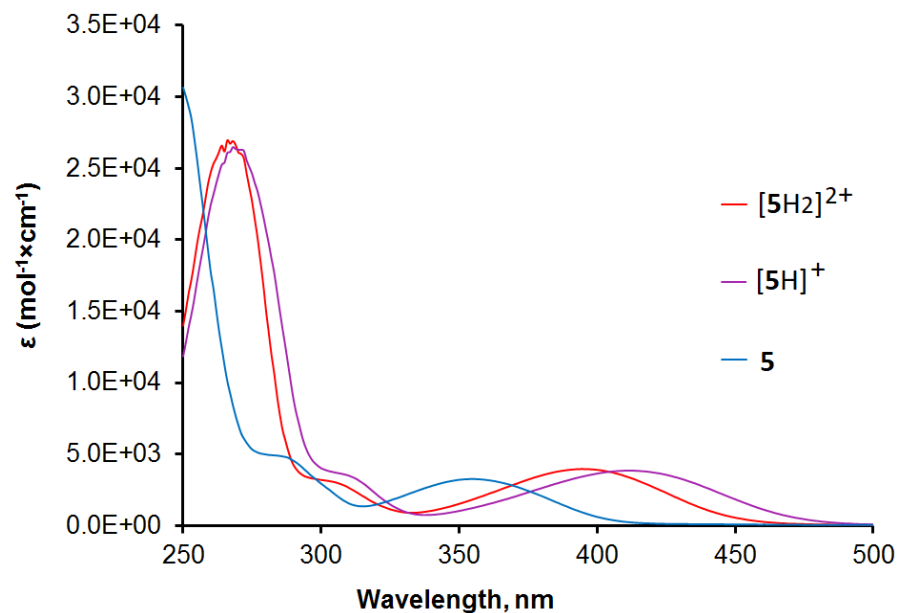

**Figure S4.** Calculated with the Specfit/32 program UV-vis spectra of **5**,  $[5H]^+$  and  $[5H_2]^{2+}$  in water.

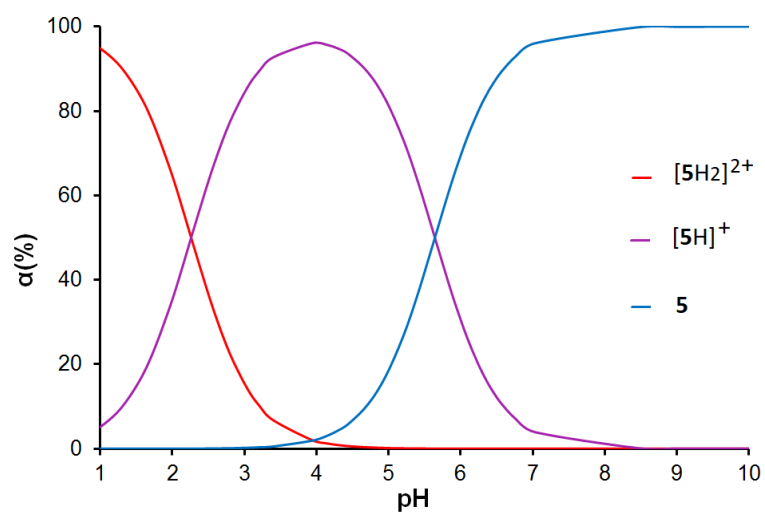

**Figure S5.** Distribution diagram of the protonated species of **5** calculated with the Specfit/32 program.

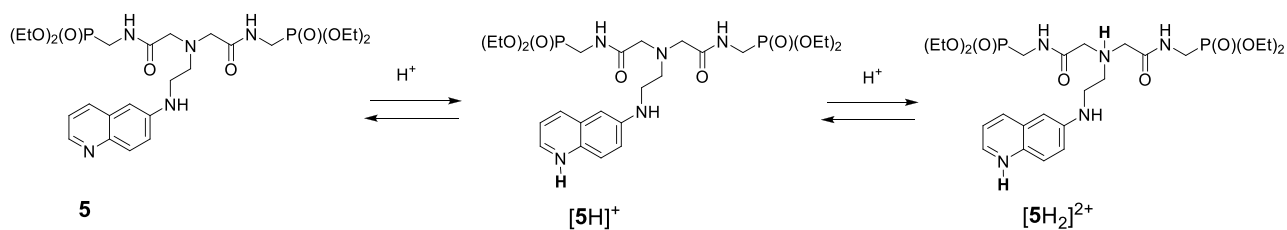

**Scheme S1.** Protonation sequence for ligand **5**.

## Spectrophotometric studies of protonation of compound **6**

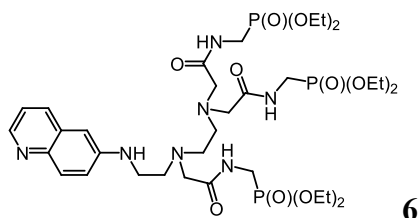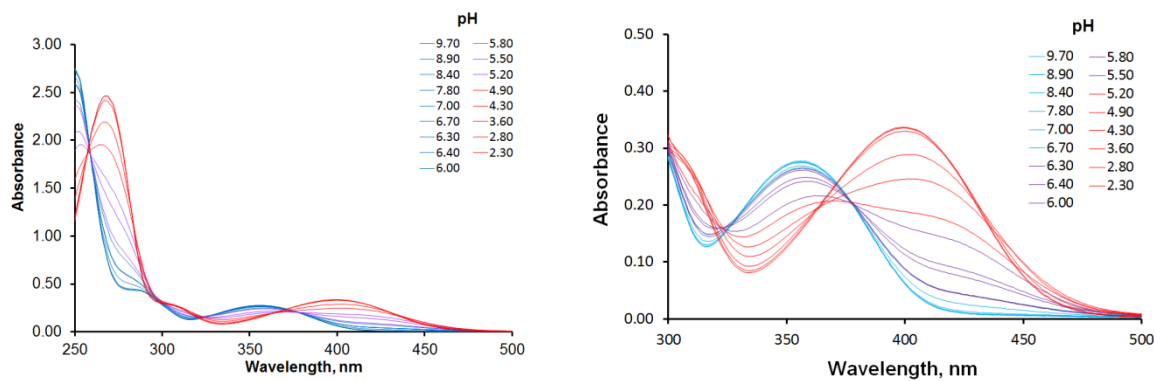

**Figure S6.** Spectrophotometric titration of **6** as a function of pH.  $[6] = 133 \mu\text{M}$ ,  $I = 0.1 \text{ M KCl}$ , pH = 2.30–9.70.

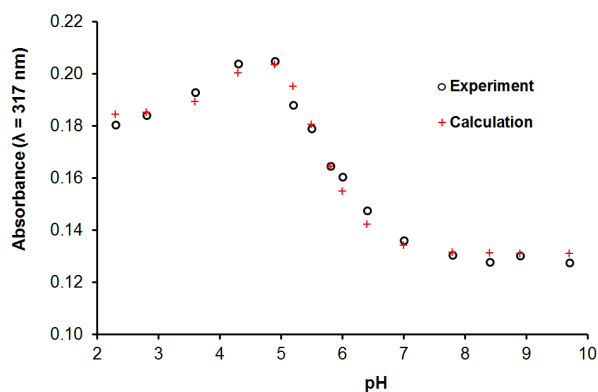

**Figure S7.** Evolution of absorbance with pH at 317 nm.

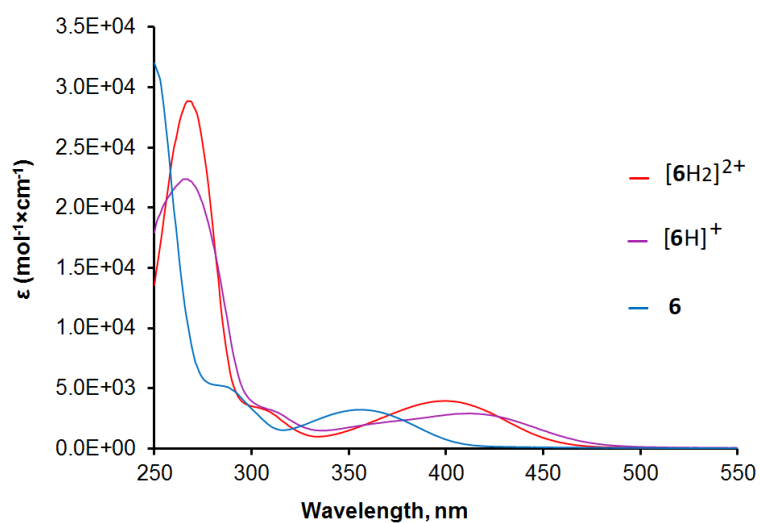

**Figure S8.** Calculated with the Specfit/32 program UV-vis spectra of **6**,  $[6\text{H}]^+$  and  $[6\text{H}_2]^{2+}$  in water.

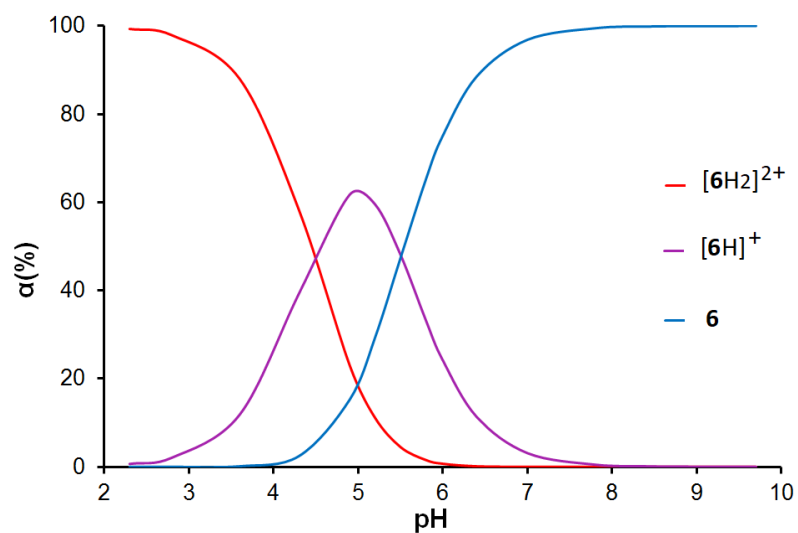

**Figure S9.** Distribution diagram of the protonated species of **6** calculated with the Specfit/32 program.

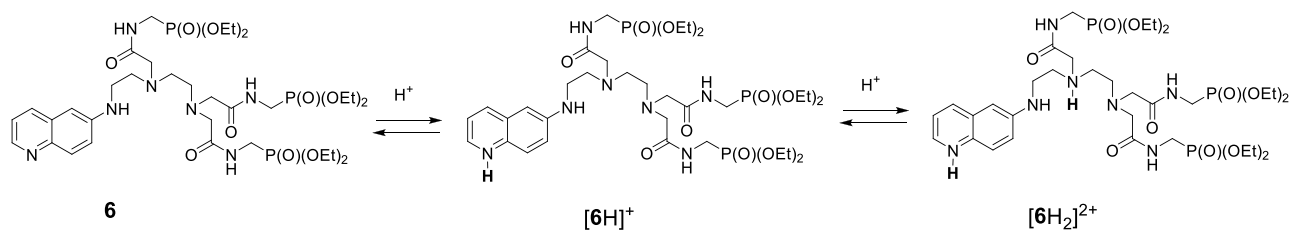

**Scheme S2.** Protonation sequence for ligand **6**.

## Spectrophotometric studies of protonation of compound **10**

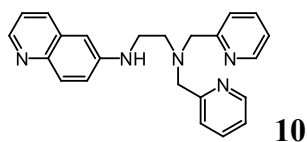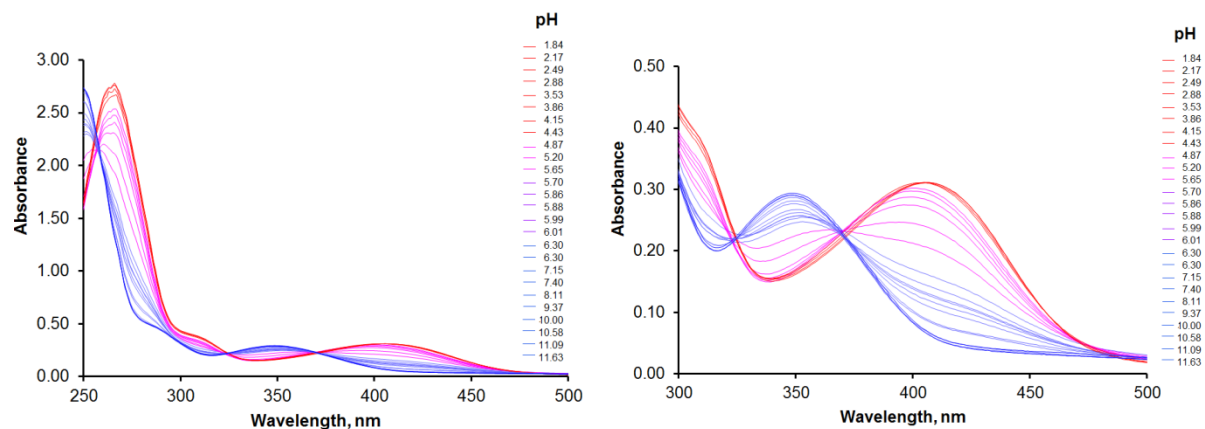

**Figure S10.** Spectrophotometric titration of **10** as a function of pH.  $[\mathbf{10}] = 103 \mu\text{M}$ , 6% MeOH,  $I = 0.1 \text{ M}$  KCl, pH = 1.84–11.63.

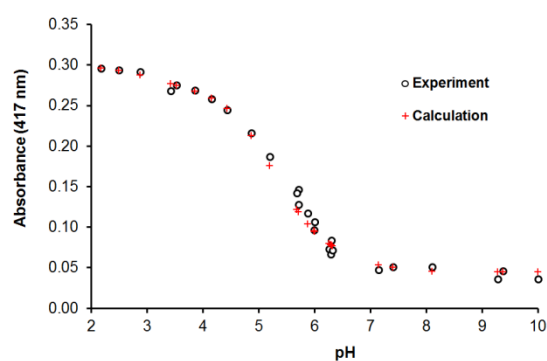

**Figure S11.** Changes of absorbance with pH at 417 nm.

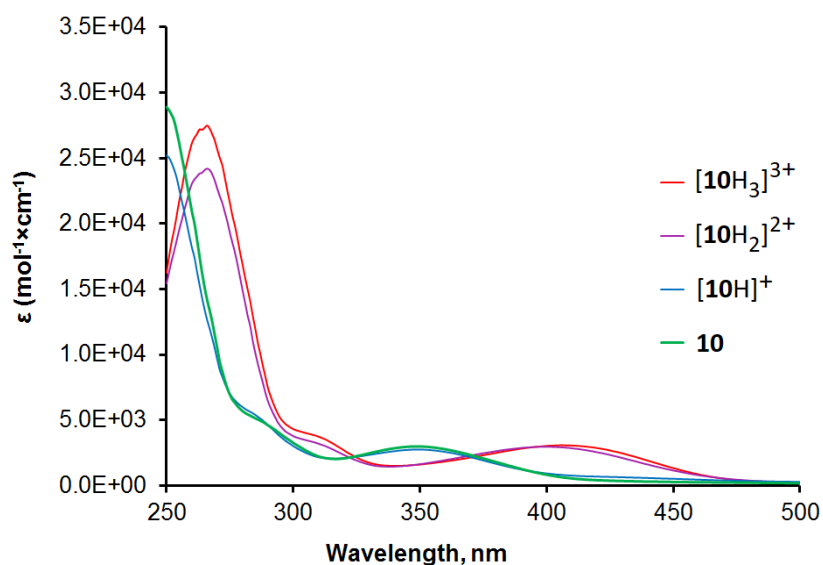

**Figure S12.** Calculated with the Specfit/32 program UV-vis spectra of **10**,  $[\mathbf{10H}]^+$ ,  $[\mathbf{10H}_2]^{2+}$  and  $[\mathbf{10H}_3]^{3+}$  in water.

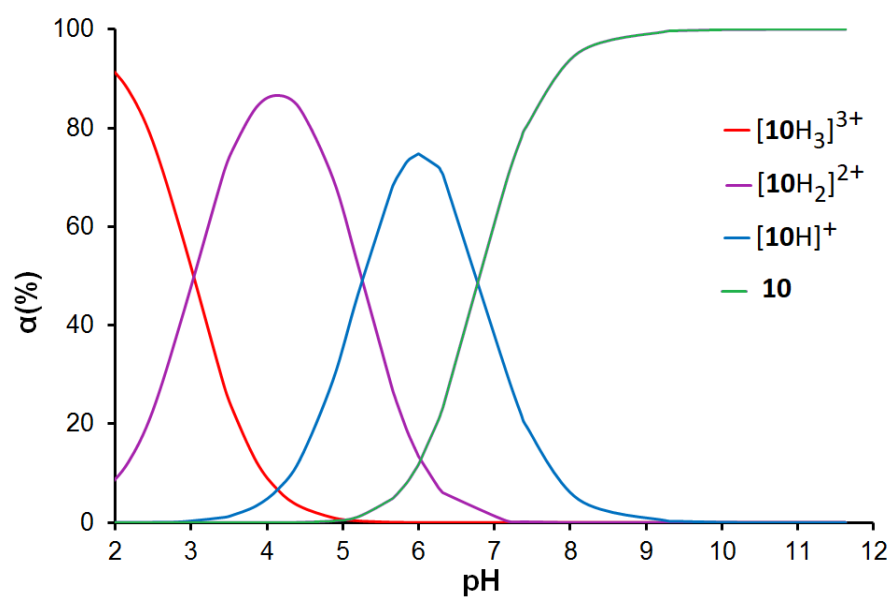

**Figure S13.** Distribution diagram of the protonated species of **10** calculated with the Specfit/32 program

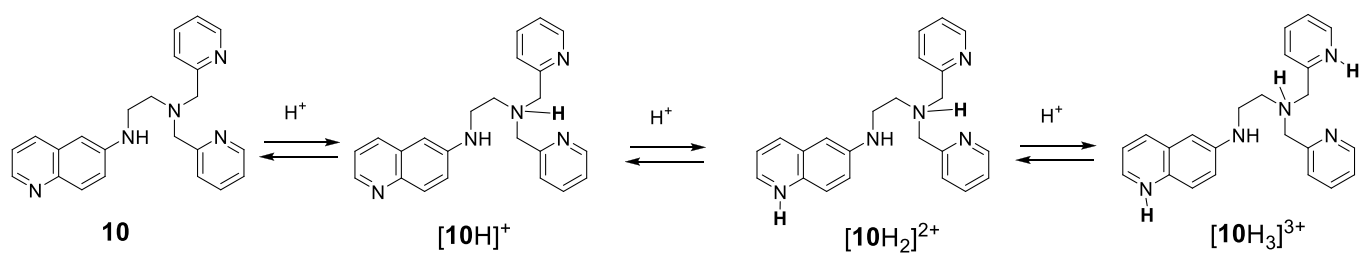

**Scheme S3.** Protonation sequence for ligand **10**.



## 2.2 Fluorescence studies

### Fluorimetric studies of protonation of compound **5**

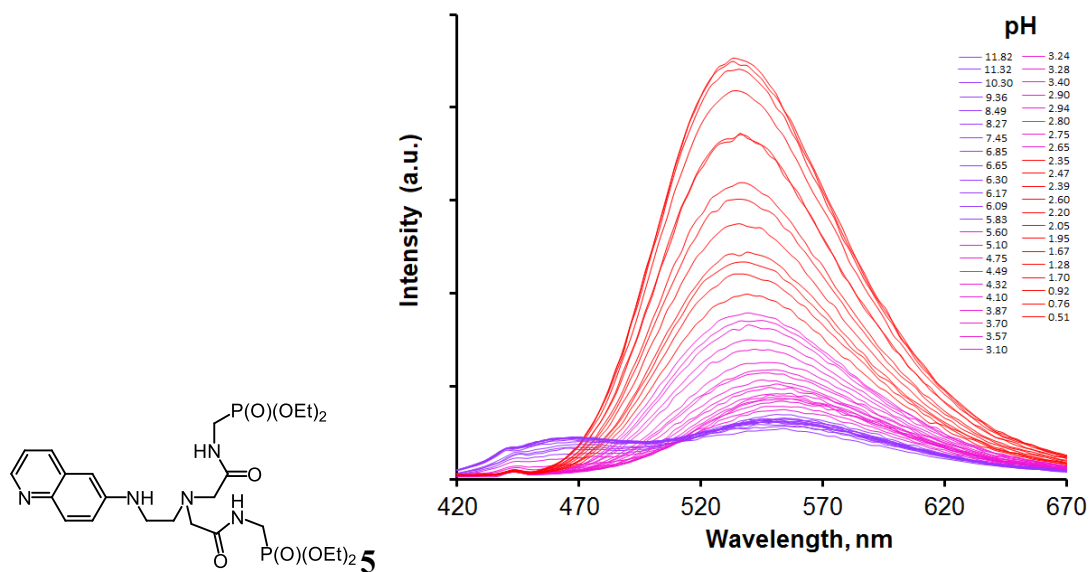

**Figure S14.** Fluorimetric titration of **5** as a function of pH.  $[5] = 27 \mu\text{M}$ ,  $I = 0.1 \text{ M KCl}$ ,  $\lambda_{\text{ex}} = 375 \text{ nm}$ , pH = 0.51–11.82.

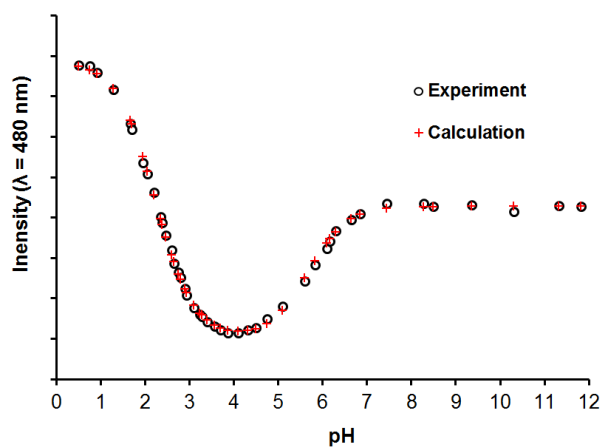

**Figure S15.** Changes of fluorescence intensity with pH at 480 nm

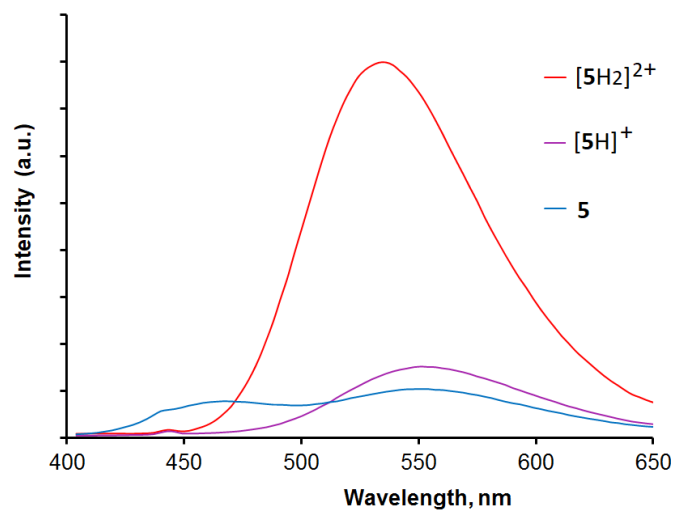

**Figure S16.** Calculated with the Specfit/32 program fluorescence spectra of **5**,  $[5H]^+$  and  $[5H_2]^{2+}$  in water.

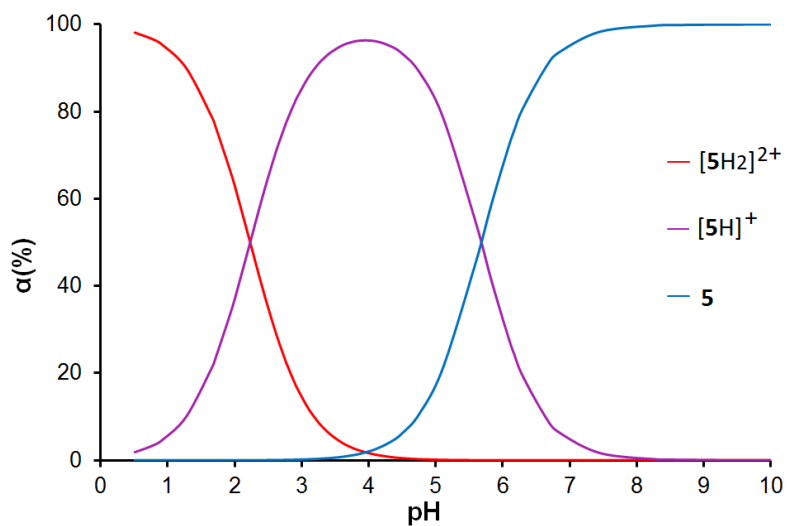

**Figure S17.** Distribution diagram of the protonated species of **5** calculated with the Specfit/32 program.

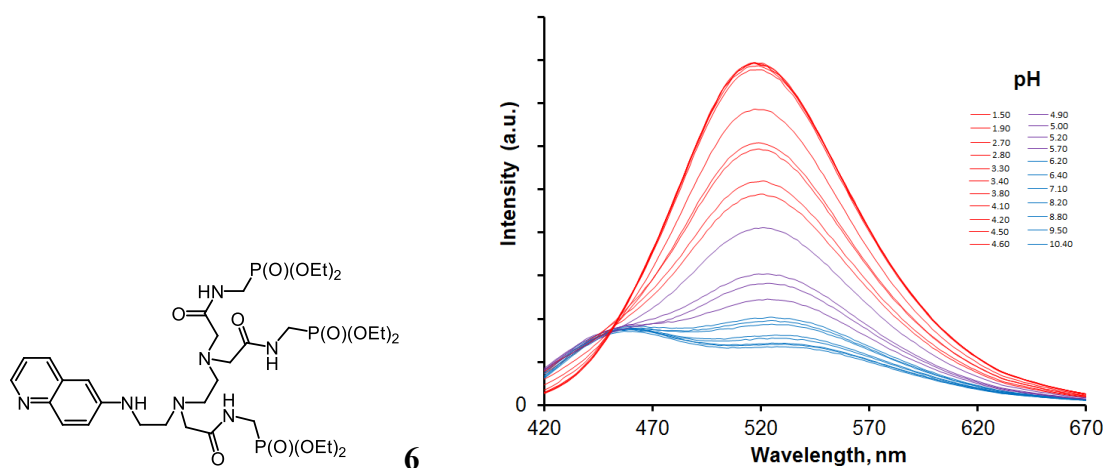

**Figure S18.** Fluorimetric titration of **6** as a function of pH.  $[6] = 20 \mu\text{M}$ ,  $I = 0.1 \text{ M KCl}$ ,  $\lambda_{\text{ex}} = 356 \text{ nm}$ , pH = 1.50–10.40

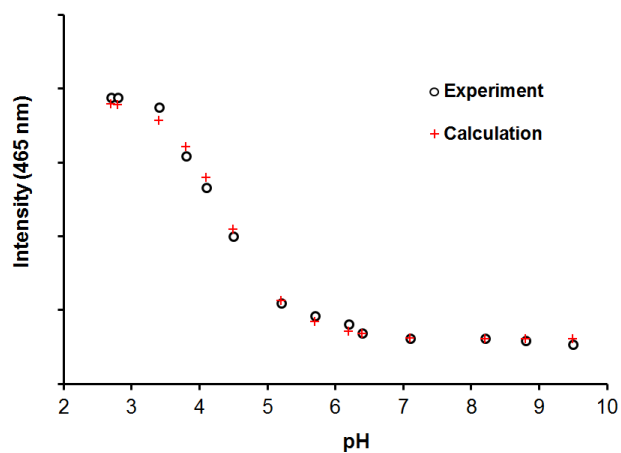

**Figure S29.** Evolution of fluorescence intensity with pH at 465 nm.

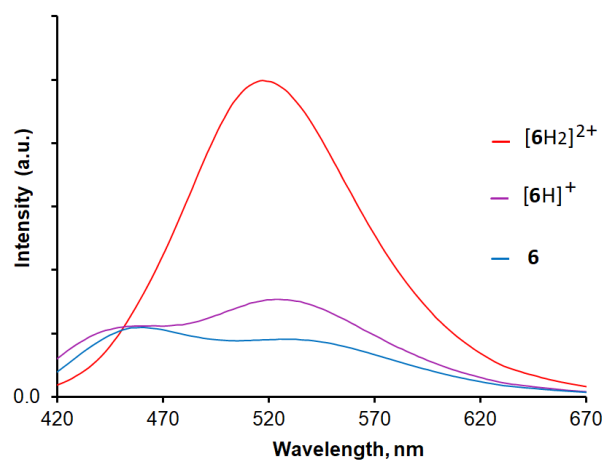

**Figure S20.** Calculated with the Specfit/32 program fluorescence spectra of **6**,  $[6\text{H}]^+$  and  $[6\text{H}_2]^{2+}$  in water.

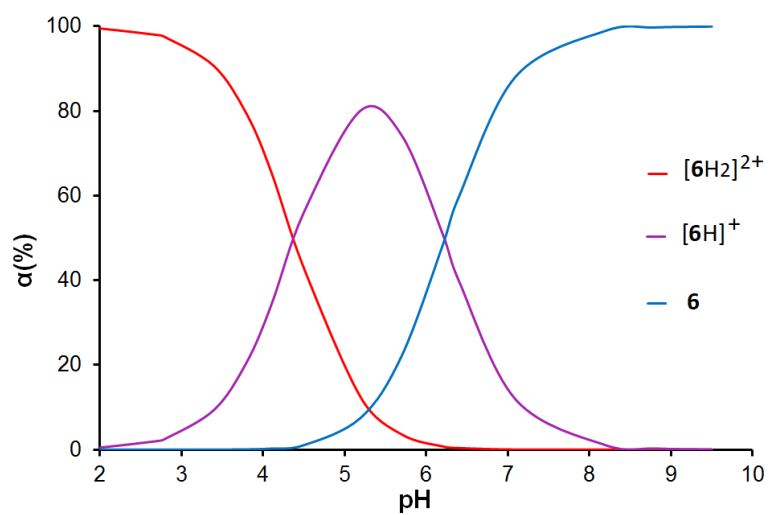

**Figure S21.** Distribution diagram of the protonated species of **6** calculated with the Specfit/32 program.

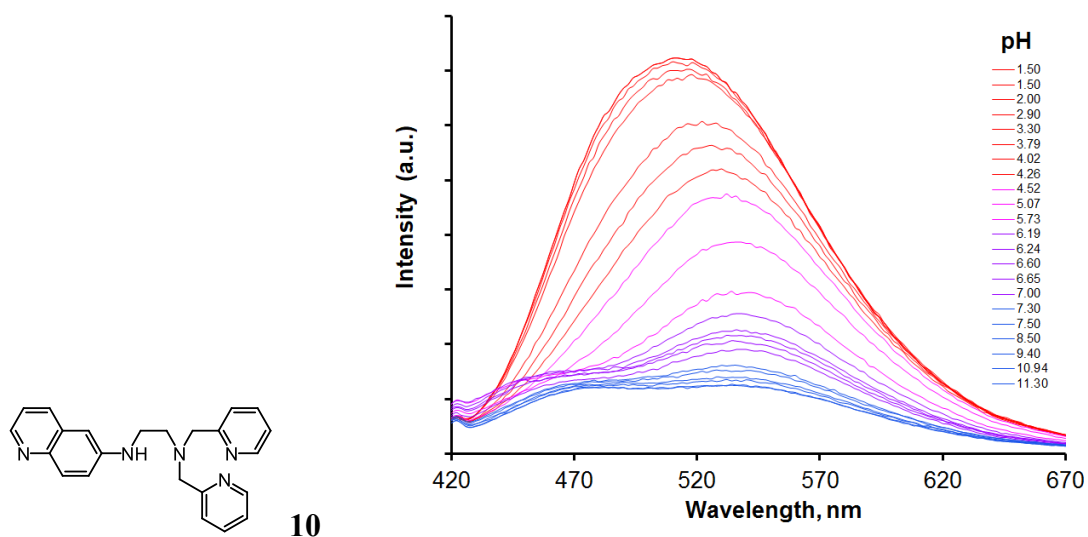

**Figure S22.** Fluorimetric titration of **10** as a function of pH.  $[\mathbf{10}] = 26 \mu\text{M}$ , 2% MeOH,  $I = 0.1 \text{ M KCl}$ ,  $\lambda_{\text{ex}} = 345 \text{ nm}$ , pH = 1.50–11.30.

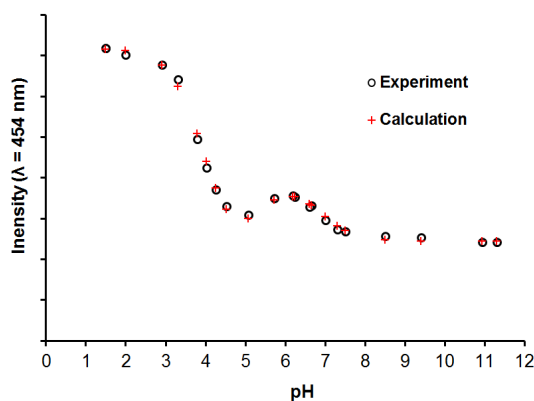

**Figure S23.** Changes of fluorescence intensity with pH at 454 nm.

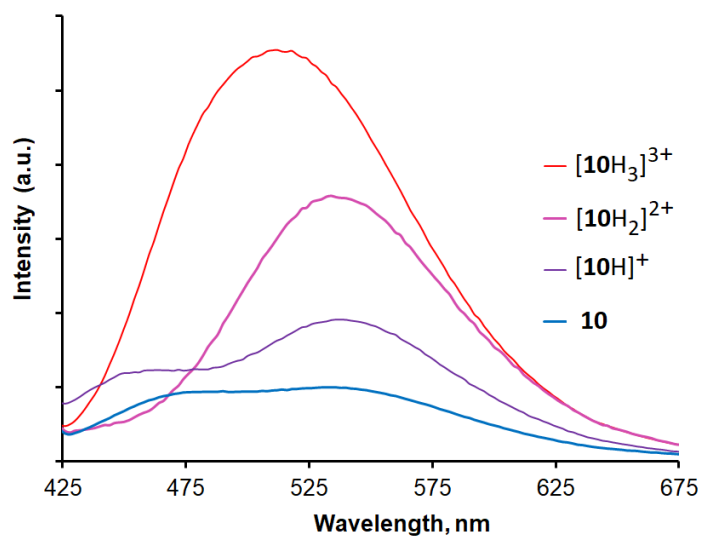

**Figure S24.** Calculated with the Specfit/32 program fluorescence spectra of **10**,  $[\mathbf{10H}]^+$ ,  $[\mathbf{10H}_2]^{2+}$  and  $[\mathbf{10H}_3]^{3+}$  in water.

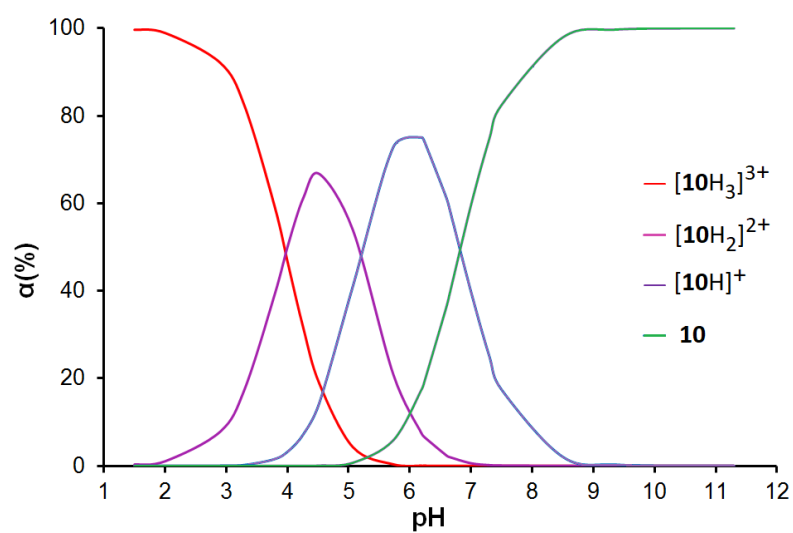

**Figure S25.** Distribution diagram of the protonated species of **10** calculated with the Specfit/32 program.

## 2.3 NMR studies of the compound 6

A

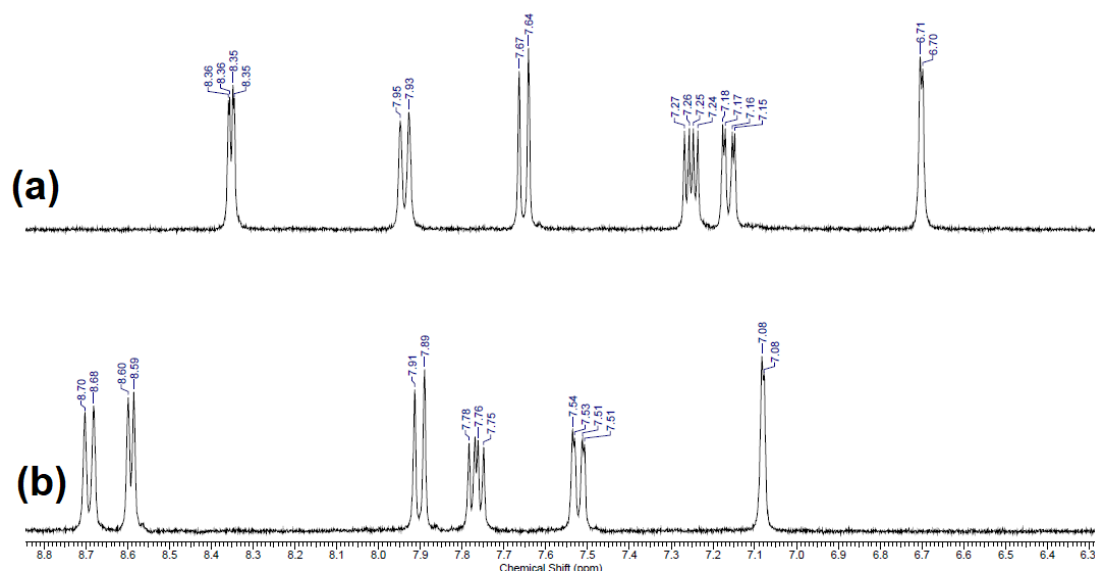

B

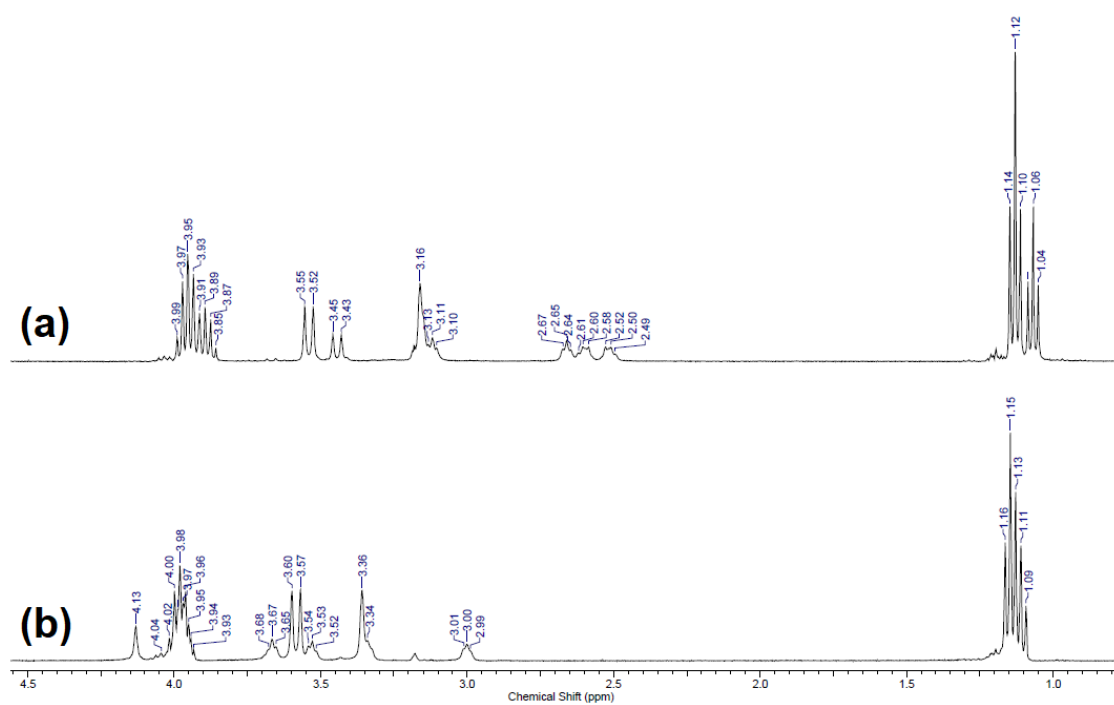

**Figure S26.** Aromatic (A) and aliphatic (B) regions of  $^1\text{H}$  NMR (400 MHz) spectra of **6** in  $\text{D}_2\text{O}/\text{MeOD}$  (5:1 v/v,  $[\text{6}] = 0.04 \text{ M}$ ) at 298 K before (a) and after addition (b) addition of gaseous  $\text{HCl}$ .

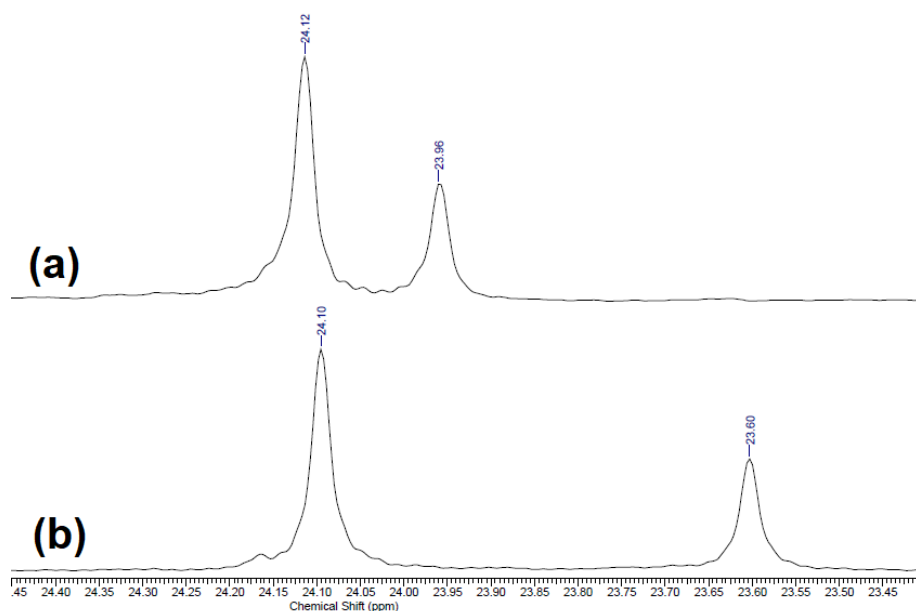

**Figure S27.**  $^{31}\text{P}\{^1\text{H}\}$  NMR (162.5 MHz) spectra (a) of **6** in  $\text{D}_2\text{O}$ -MeOD (5:1 v/v,  $[\mathbf{6}] = 0.04\text{ M}$ ) at 298 K before (a) and after addition (b) addition of gaseous HCl.



### 3. Metal binding studies of compounds 5, 6 and 10

#### 3.1 Fluorimetric and spectrophotometric studies of metal binding by compound 10

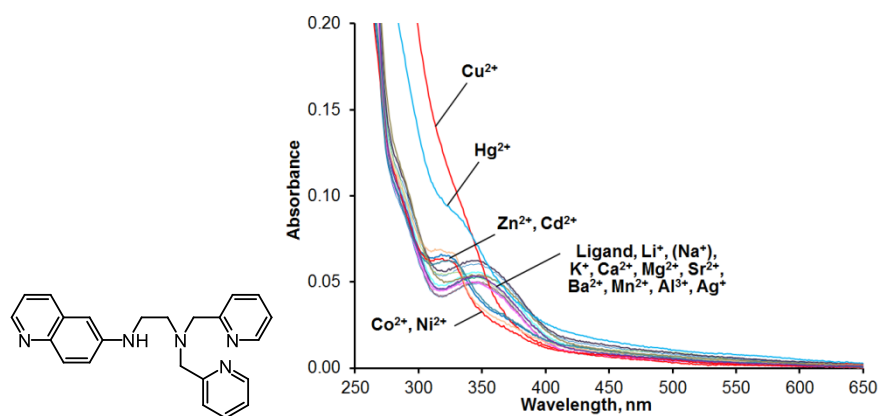

**Figure S28.** UV-vis spectra of **10** ( $[\mathbf{10}] = 20 \mu\text{M}$ , 0.03M HEPES buffer, 2% MeOH, pH = 7.4) before and after addition of 5 equiv. of metal perchlorates.

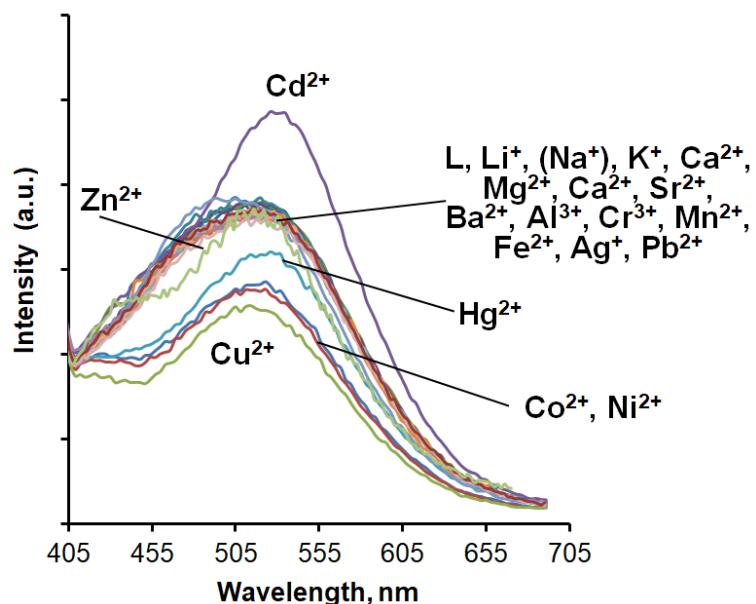

**Figure S29.** Fluorescence spectra of **10** ( $[\mathbf{10}] = 20 \mu\text{M}$ , 0.03M HEPES buffer, 2% MeOH, pH = 7.4,  $\lambda_{\text{ex}} = 345 \text{ nm}$ ) before and after addition of 5 equiv. of metal perchlorates.

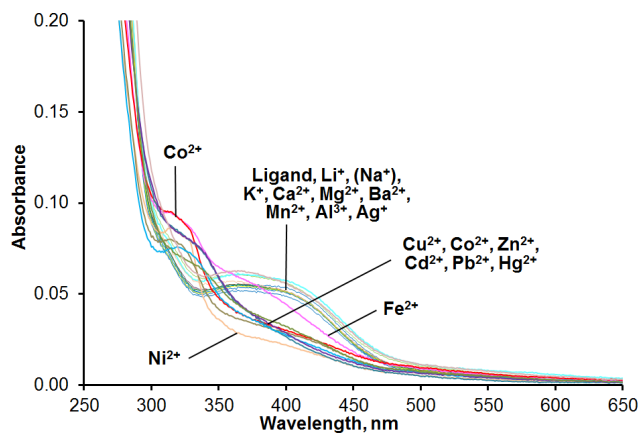

**Figure S30.** UV-vis spectra of **10** ( $[\mathbf{10}] = 27 \mu\text{M}$ , 0.03M acetate buffer, 2% MeOH pH = 5.0) before and after addition of 5 equiv. of metal perchlorates.

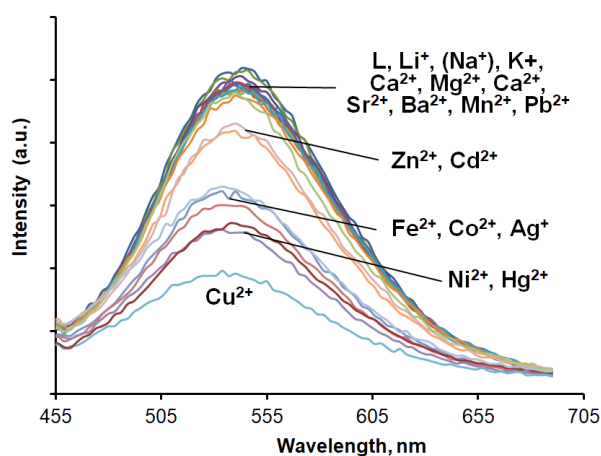

**Figure S31.** Fluorescence spectra of **10** ( $[\mathbf{10}] = 27 \mu\text{M}$ , 0.03M acetate buffer, 2% MeOH, pH = 5.0,  $\lambda_{\text{ex}} = 385 \text{ nm}$ ) before and after addition of 5 equiv. of metal perchlorates.

### 3.2 Fluorimetric and spectrophotometric studies of metal binding by compound **5**

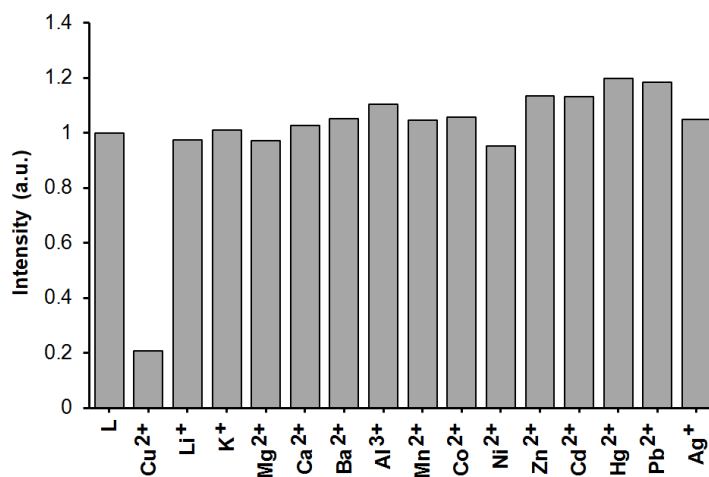

**Figure S32.** Normalized (to the ligand emission) fluorescence intensity ( $\lambda = 551$  nm) of ligand **5** ( $[5] = 27$   $\mu$ M) in 0.03 M HEPES buffer at pH = 7.4 ( $\lambda_{\text{ex}} = 355$  nm) and solutions obtained after addition of 1 equiv of metal perchlorates.

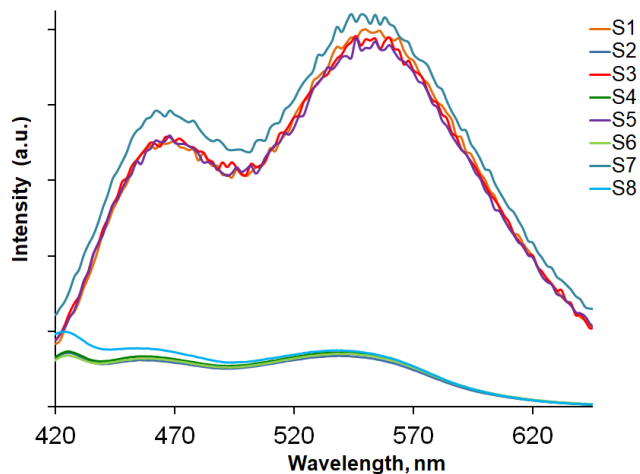

**Figure S33.** Cross-selectivity studies of metal ion binding by ligand **5** ( $[5] = 27 \mu\text{M}$ ,  $0.03\text{M}$  HEPES buffer,  $\text{pH} = 7.4$ ,  $\lambda_{\text{ex}} = 355 \text{ nm}$ ) using fluorescence spectroscopy:

(S1) emission spectrum of **5**,

(S2) emission spectrum of **5** after addition of  $\text{Cu}^{2+}$  (1 equiv),

(S3) emission spectrum of **5** after addition of  $\text{Li}^+$ ,  $(\text{Na}^+)$ ,  $\text{K}^+$ ,  $\text{Mg}^{2+}$ ,  $\text{Ca}^{2+}$ ,  $\text{Ba}^{2+}$ ,  $\text{Al}^{3+}$  (1 equiv of each metal ion),

(S4) emission spectrum of **5** after addition of  $\text{Li}^+$ ,  $(\text{Na}^+)$ ,  $\text{K}^+$ ,  $\text{Mg}^{2+}$ ,  $\text{Ca}^{2+}$ ,  $\text{Ba}^{2+}$ ,  $\text{Al}^{3+}$  (1 equiv of each metal ion) and  $\text{Cu}^{2+}$  (1 equiv)

(S5) emission spectrum of **5** after addition of  $\text{Mn}^{2+}$ ,  $\text{Co}^{2+}$ ,  $\text{Ni}^{2+}$ ,  $\text{Zn}^{2+}$  (1 equiv of each metal ion),

(S6) emission spectrum of **5** after addition of  $\text{Mn}^{2+}$ ,  $\text{Co}^{2+}$ ,  $\text{Ni}^{2+}$ ,  $\text{Zn}^{2+}$  (1 equiv of each metal ion) and  $\text{Cu}^{2+}$  (1 equiv)

(S7) emission spectrum of **5** after addition of  $\text{Ag}^+$ ,  $\text{Hg}^{2+}$ ,  $\text{Cd}^{2+}$ ,  $\text{Pb}^{2+}$  (1 equiv of each metal ion),

(S8) emission spectrum of **5** after addition of  $\text{Ag}^+$ ,  $\text{Hg}^{2+}$ ,  $\text{Cd}^{2+}$ ,  $\text{Pb}^{2+}$  (1 equiv of each metal ion) and  $\text{Cu}^{2+}$  (1 equiv)

## Determination of stability constants

### Spectrophotometric titration

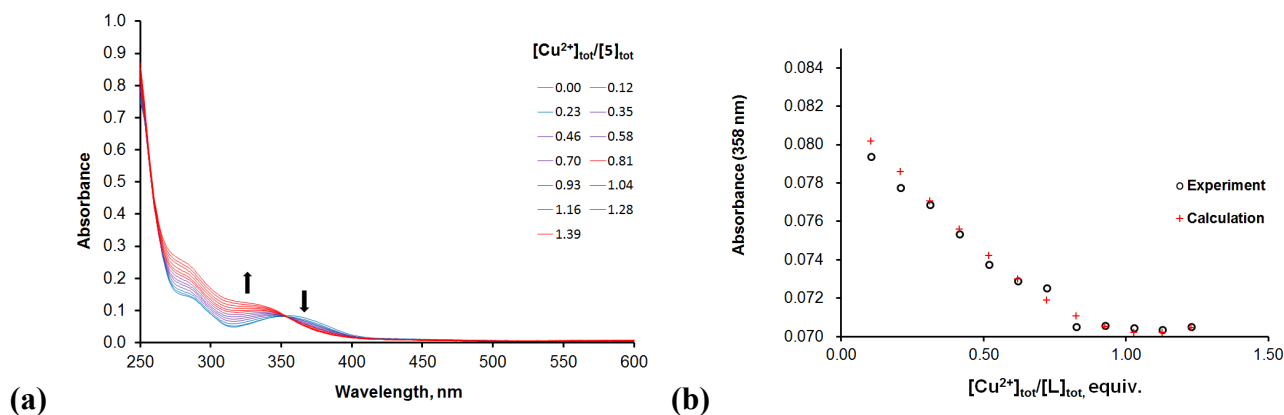

**Figure S34.** (a) Evolution of UV-vis spectrum of **5** (**5** = 27  $\mu\text{M}$ , 0.03M HEPES buffer, pH = 7.4) upon addition of  $\text{Cu}(\text{ClO}_4)_2$  (0–1.4 equiv.). (b) Changes of absorbance against  $[\text{Cu}^{2+}]_{\text{tot}}/[\text{5}]_{\text{tot}}$  ratio at 358 nm.

Model for calculation:

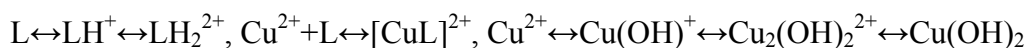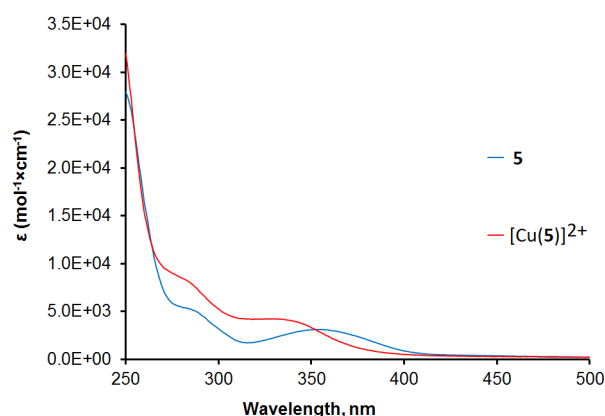

**Figure S35.** Calculated with the Specfit/32 program UV-vis spectra of **5** and  $[\text{Cu}(\text{5})]^{2+}$  in 0.03M HEPES buffer at pH = 7.4.

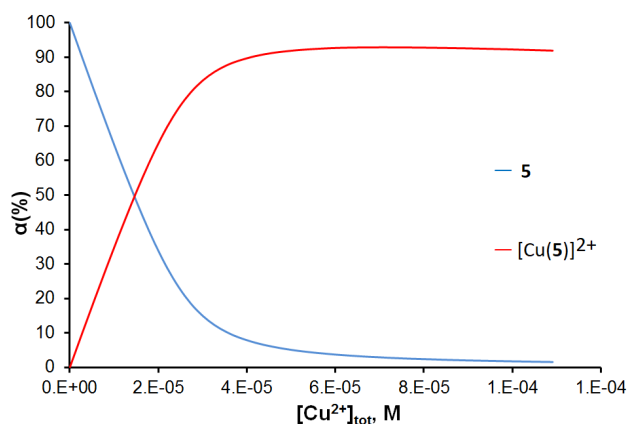

**Figure S36.** Distribution diagram of **5** complexes formed with  $\text{Cu}^{\text{II}}$  (**5** = 27  $\mu\text{M}$ , 0.03M HEPES buffer, pH = 7.4) calculated with the Specfit/32 program.

## Fluorescence titration

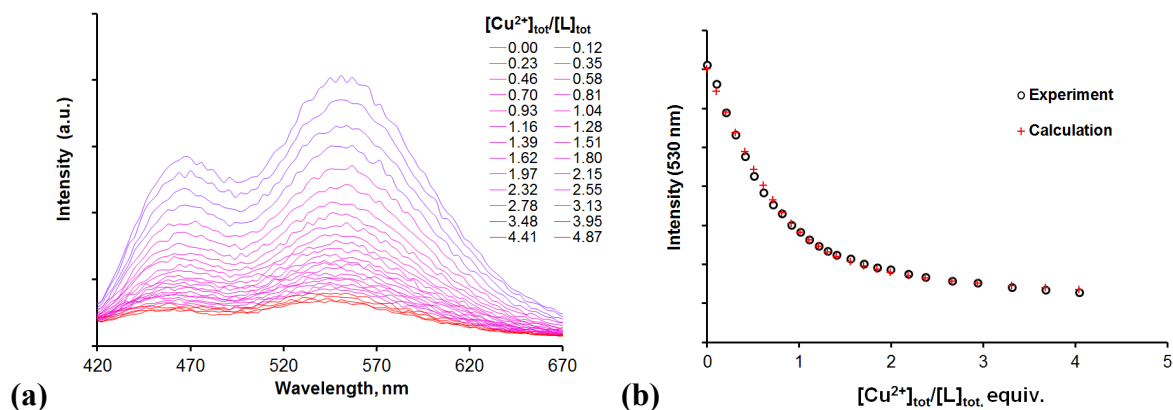

**Figure S37.** (a) Evolution of fluorescence spectrum of **5** ( $[\mathbf{5}] = 27 \mu\text{M}$ ,  $0.03\text{M}$  HEPES buffer,  $\text{pH}=7.4$ ,  $\lambda_{\text{ex}} = 355 \text{ nm}$ ) upon addition of  $\text{Cu}(\text{ClO}_4)_2$  ( $0 - 4.87$  equiv.). (b) Changes of fluorescence intensity against  $[\text{Cu}^{2+}]_{\text{tot}}/[\mathbf{5}]_{\text{tot}}$  ratio at  $550 \text{ nm}$ .

Model for calculation:

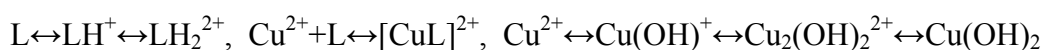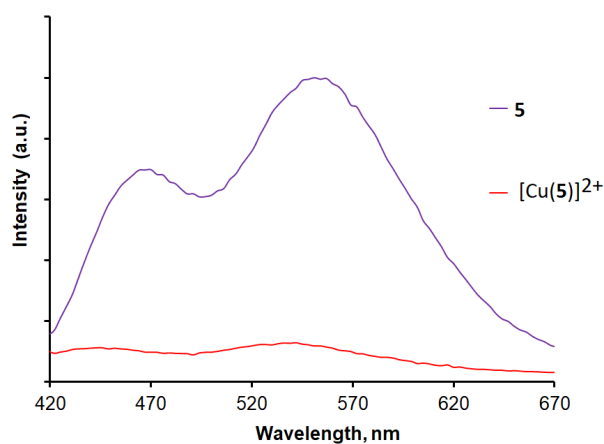

**Figure S38.** Calculated with the Specfit/32 program fluorescence spectra of **5** and  $[\text{Cu}(\mathbf{5})]^{2+}$  in water.

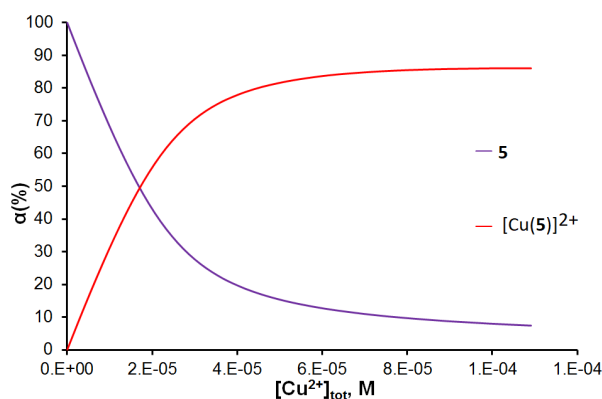

**Figure S39.** Species distribution diagram for the  $\mathbf{5}/\text{Cu}^{2+}$  system in water calculated with the Specfit/32 program.

### 3.3. Fluorimetric and spectrophotometric studies of metal binding by the compound 6

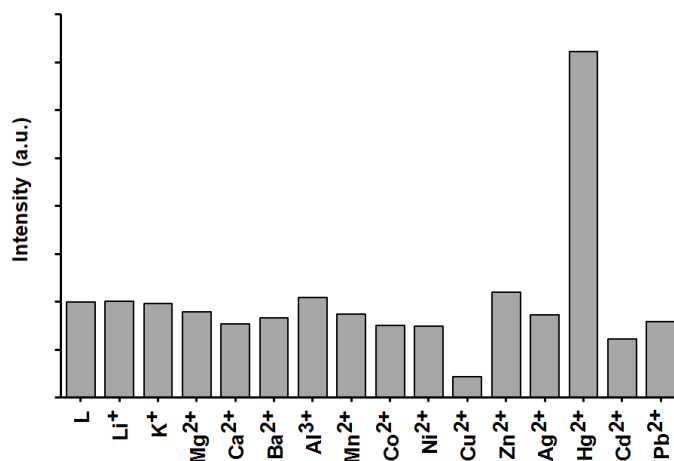

**Figure S40.** Fluorescence intensity of **6** ( $[6] = 20 \mu\text{M}$ , 0.03M HEPES buffer, pH=7.4,  $\lambda_{\text{ex}} = 356 \text{ nm}$ ) before and after addition of 1 equiv of metal perchlorates solutions at 548 nm.

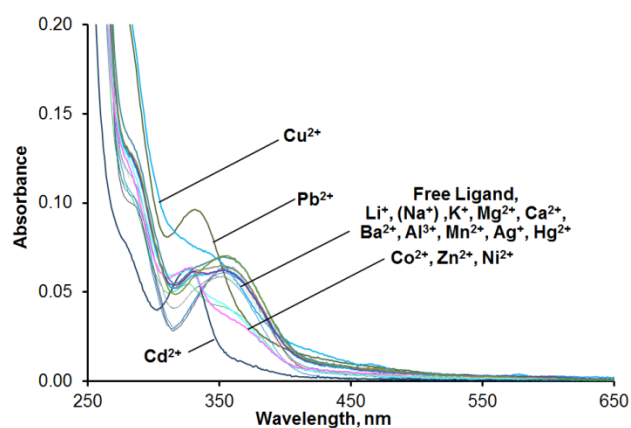

**Figure S41.** UV-vis spectra of **6** ( $[6] = 20 \mu\text{M}$ , 0.03M HEPES buffer, pH=7.4) before and after addition of 1 equiv of metal perchlorates.

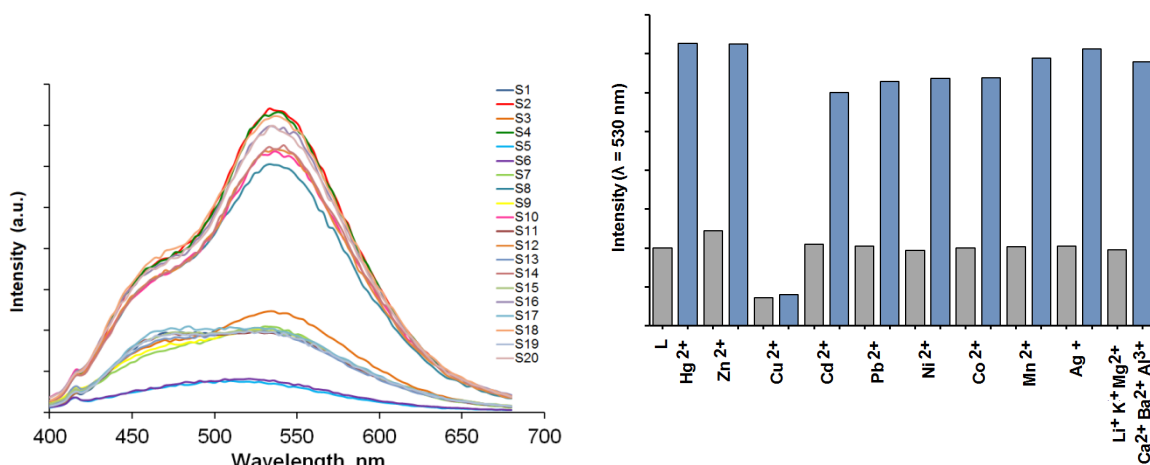

**Figure S42.** Cross-selectivity studies of metal ion binding by ligand **8** ([**8**] = 20  $\mu$ M, 0.03M HEPES buffer, pH=7.4,  $\lambda_{\text{ex}}$  = 356 nm) using fluorescence spectroscopy:

- (S1) emission spectrum of **6**,
- (S2) emission spectrum of **6** after addition of Hg<sup>2+</sup> (1 equiv.),
- (S3) emission spectrum of **6** after addition of Zn<sup>2+</sup> (1 equiv.),
- (S4) emission spectrum of **6** after addition of Zn<sup>2+</sup> (1 equiv.), and Hg<sup>2+</sup> (1 equiv.)
- (S5) emission spectrum of **6** after addition of Cu<sup>2+</sup> (1 equiv.),
- (S6) emission spectrum of **6** after addition of Cu<sup>2+</sup> (1 equiv.), and Hg<sup>2+</sup> (1 equiv.)
- (S7) emission spectrum of **6** after addition of Cd<sup>2+</sup> (1 equiv.),
- (S8) emission spectrum of **6** after addition of Cd<sup>2+</sup> (1 equiv.), and Hg<sup>2+</sup> (1 equiv.)
- (S9) emission spectrum of **6** after addition of Pb<sup>2+</sup> (1 equiv.),
- (S10) emission spectrum of **6** after addition of Pb<sup>2+</sup> (1 equiv.), and Hg<sup>2+</sup> (1 equiv.)
- (S11) emission spectrum of **6** after addition of Ni<sup>2+</sup> (1 equiv.),
- (S12) emission spectrum of **6** after addition of Ni<sup>2+</sup> (1 equiv.), and Hg<sup>2+</sup> (1 equiv.)
- (S13) emission spectrum of **6** after addition of Co<sup>2+</sup> (1 equiv.),
- (S14) emission spectrum of **6** after addition of Co<sup>2+</sup> (1 equiv.), and Hg<sup>2+</sup> (1 equiv.)
- (S15) emission spectrum of **6** after addition of Mn<sup>2+</sup> (1 equiv.),
- (S16) emission spectrum of **6** after addition of Mn<sup>2+</sup> (1 equiv.), and Hg<sup>2+</sup> (1 equiv.)
- (S17) emission spectrum of **6** after addition of Ag<sup>+</sup> (1 equiv.),
- (S18) emission spectrum of **6** after addition of Ag<sup>+</sup> (1 equiv.), and Hg<sup>2+</sup> (1 equiv.)
- (S19) emission spectrum of **6** after addition of Li<sup>+</sup>, (Na<sup>+</sup>), K<sup>+</sup>, Mg<sup>2+</sup>, Ca<sup>2+</sup>, Ba<sup>2+</sup>, Al<sup>3+</sup> (1 equiv. of each metal ion),
- (S20) emission spectrum of **6** after addition of Li<sup>+</sup>, (Na<sup>+</sup>), K<sup>+</sup>, Mg<sup>2+</sup>, Ca<sup>2+</sup>, Ba<sup>2+</sup>, Al<sup>3+</sup> (1 equiv. of each metal ion) and Hg<sup>2+</sup> (1 equiv.)



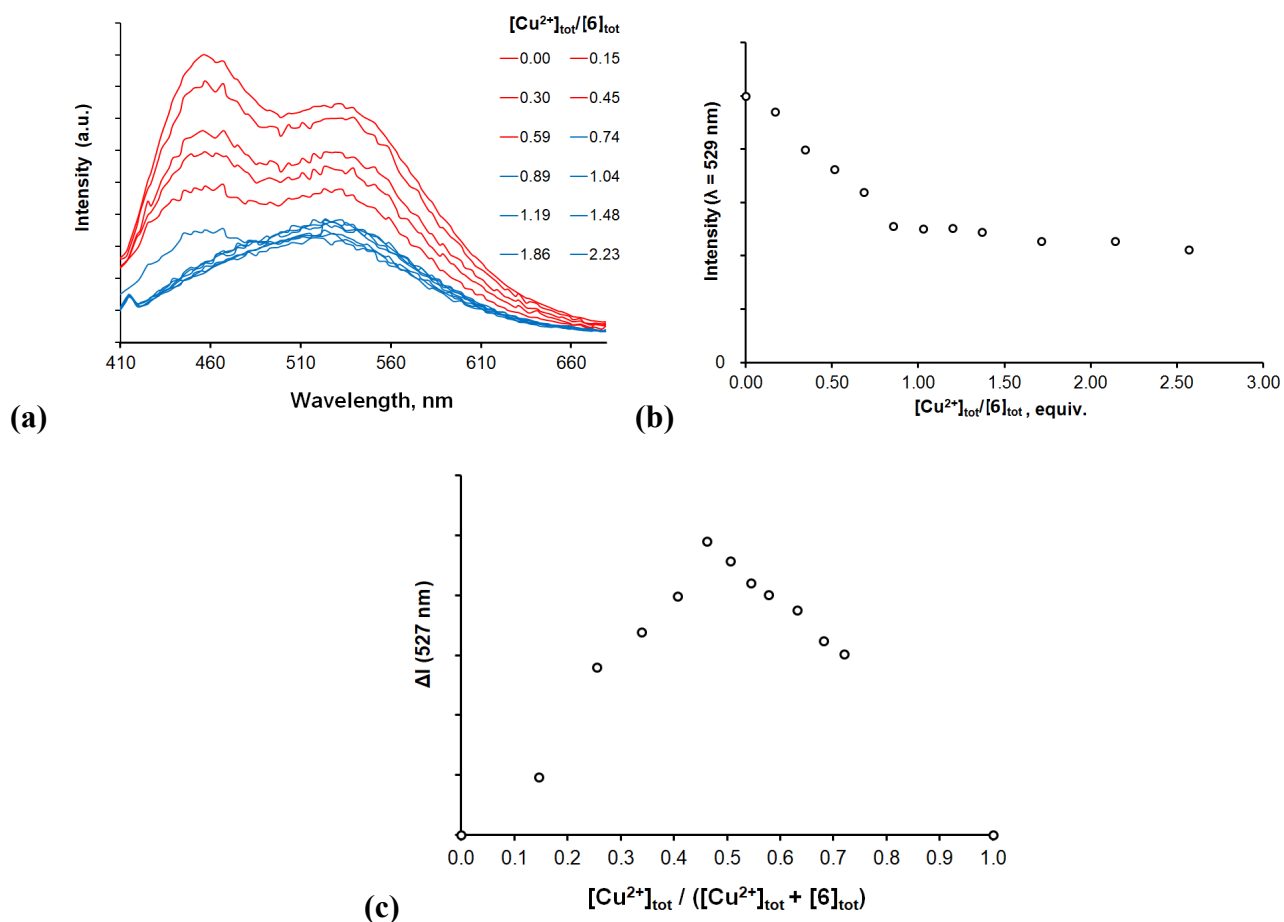

**Figure S43.** (a) Evolution of fluorescence spectrum of **6** ([**6**] = 13  $\mu$ M, 0.03M HEPES buffer, pH=7.4,  $\lambda_{\text{ex}}$  = 356 nm) upon addition of  $\text{Cu}(\text{ClO}_4)_2$  (0–2.5 equiv.). (b) Changes of fluorescence intensity against  $[\text{Cu}^{2+}]_{\text{tot}}/[\text{6}]_{\text{tot}}$  ratio at 529 nm. (c) Job's plot derived from the titration curve {P. MacCarthy, *Anal. Chem.*, 1978, 50(14), 2165}.

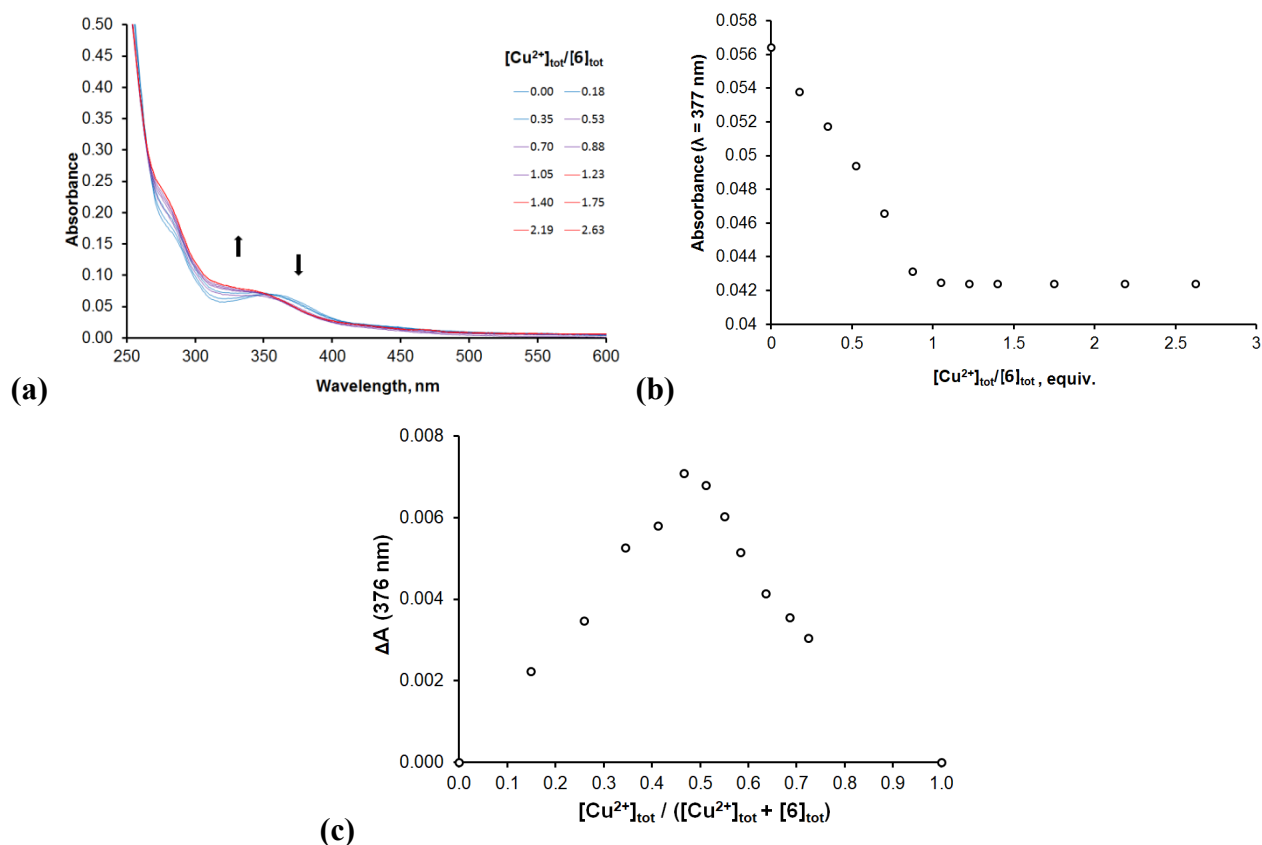

**Figure S44.** (a) Evolution of UV–vis spectrum of **6** ( $[\text{6}] = 15 \mu\text{M}$ , 0.03M HEPES buffer, pH=7.4) upon addition of  $\text{Cu}(\text{ClO}_4)_2$  (0 – 2.5 equiv.). (b) Changes of absorbance against  $[\text{Cu}^{2+}]_{\text{tot}}/[\text{6}]_{\text{tot}}$  ratio at 377 nm. (c) Job's plot derived from the titration curve {P. MacCarthy, *Anal. Chem.*, **1978**, 50, 2165}.

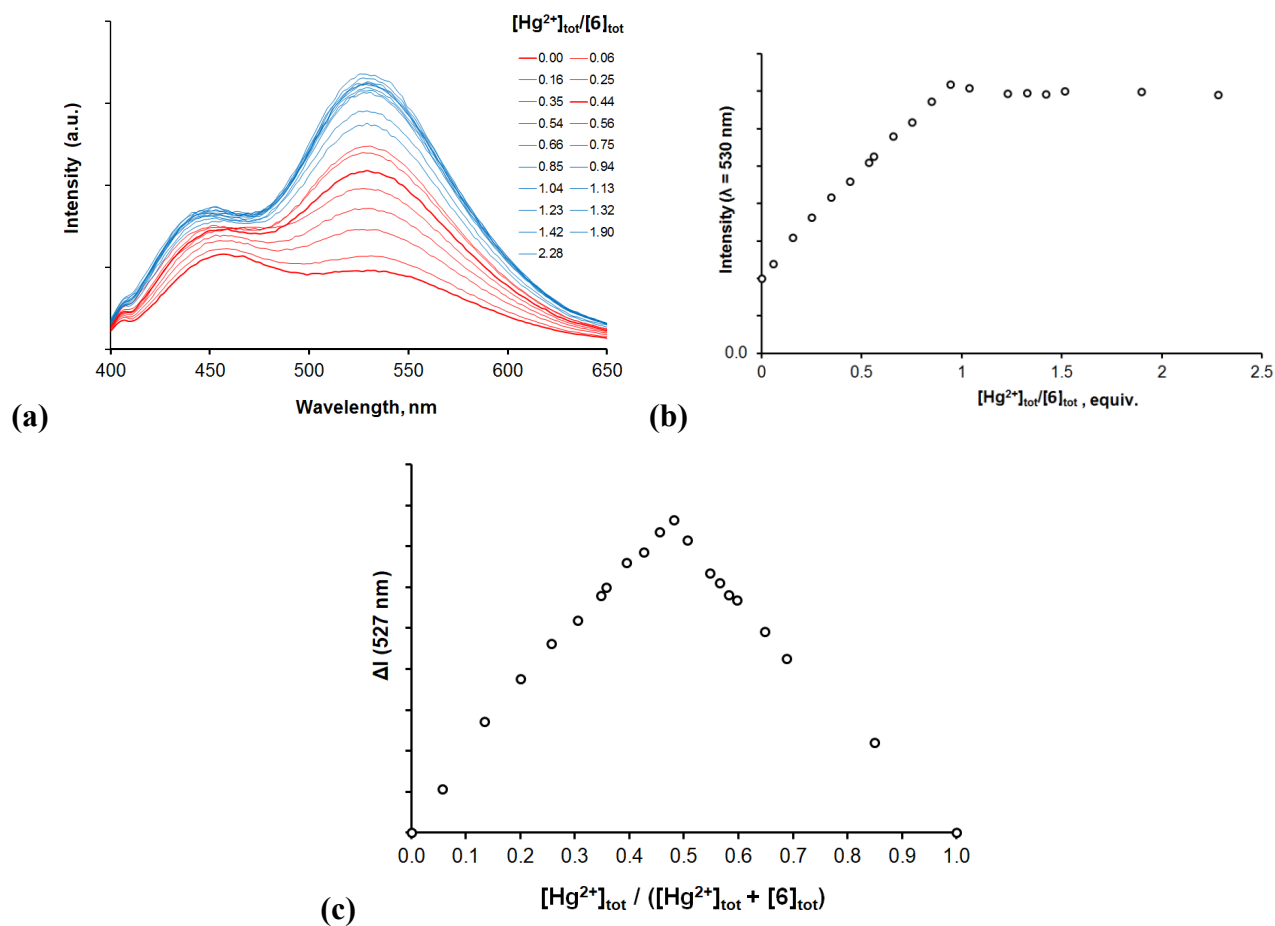

**Figure S45.** (a) Evolution of fluorescence spectrum of **6** ([**6**] = 20  $\mu\text{M}$ , 0.03M HEPES buffer, pH=7.4,  $\lambda_{\text{ex}}$  = 356 nm) upon addition of  $\text{Hg}(\text{ClO}_4)_2$  (0–2.5 equiv.); (b) Changes of fluorescence intensity against  $[\text{Hg}^{2+}]_{\text{tot}}/[\text{6}]_{\text{tot}}$  ratio at 530 nm. (c) Job's plot derived from the titration curve {P. MacCarthy, *Anal. Chem.*, **1978**, 50, 2165}.

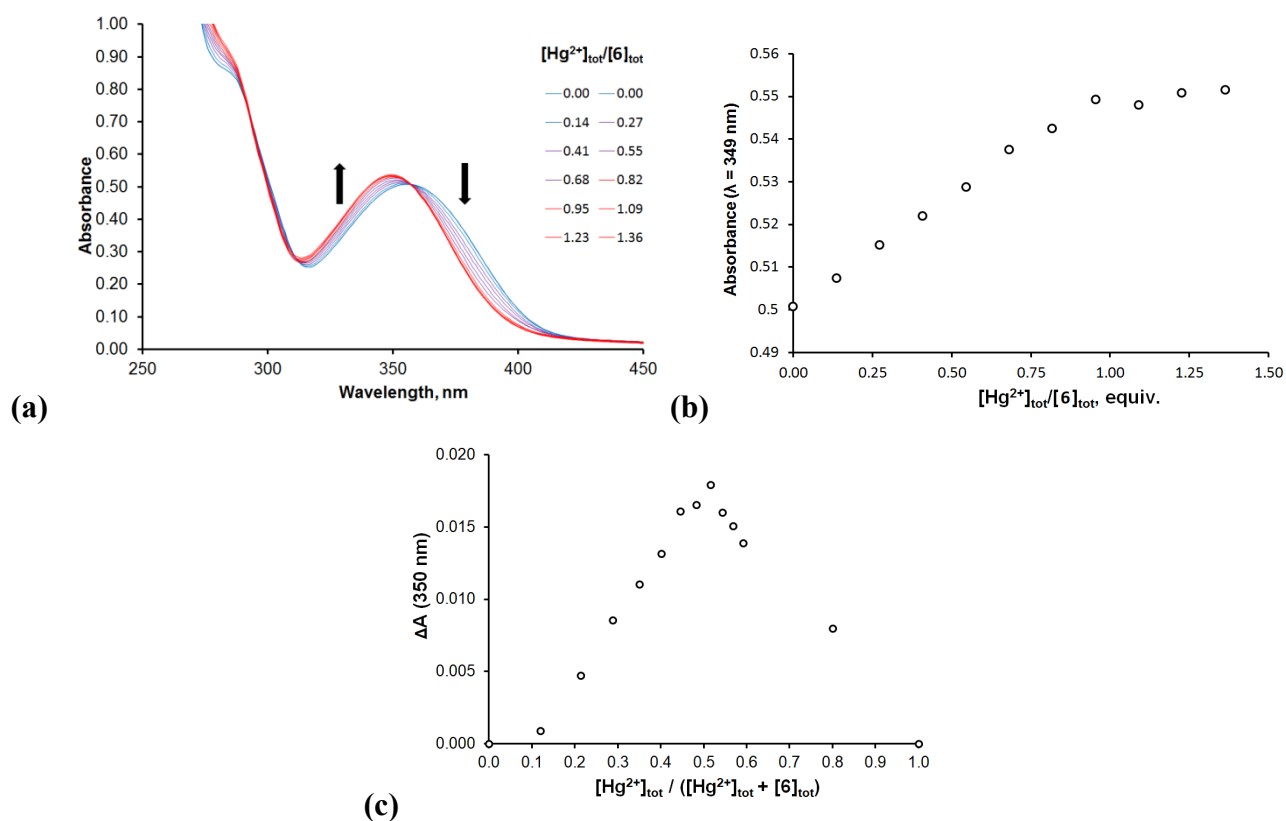

**Figure S46.** (a) Evolution of UV–vis spectrum of **6** ( $[\text{6}] = 196 \mu\text{M}$ , 0.03M HEPES buffer, pH=7.4) upon addition of  $\text{Hg}(\text{ClO}_4)_2$  (0–1.5 equiv); (b) Changes of absorbance against  $[\text{Hg}^{2+}]_{\text{tot}}/[\text{6}]_{\text{tot}}$  ratio at 349 nm. (c) Job's plot derived from the titration curve {P. MacCarthy, *Anal. Chem.*, **1978**, 50, 2165}.

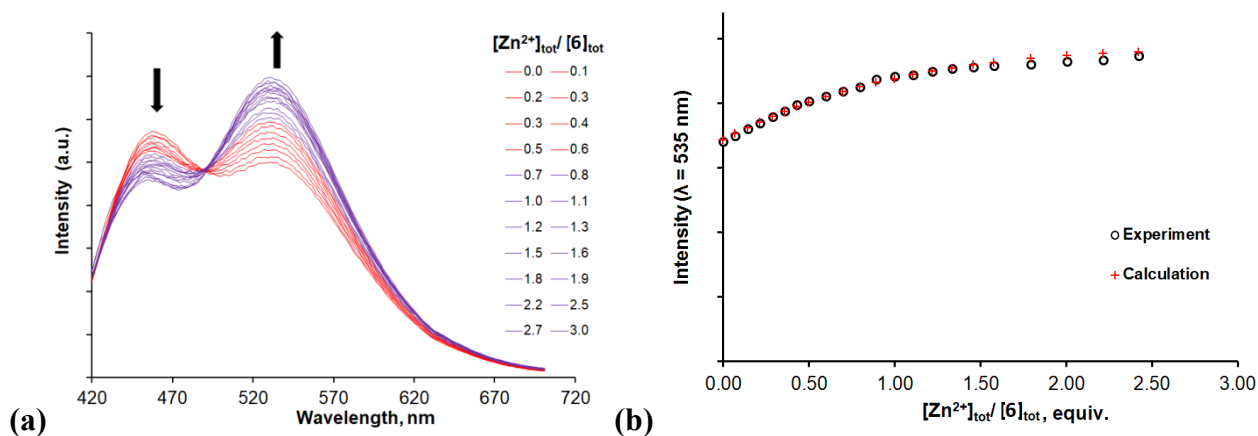

**Figure S47.** (a) Evolution of fluorescence spectrum of **6** (**6** = 20  $\mu\text{M}$ , 0.03M HEPES buffer, pH=7.4,  $\lambda_{\text{ex}}$  = 356 nm) upon addition of  $\text{Zn}(\text{ClO}_4)_2$  (0–3 equiv.); (b) Changes of fluorescence intensity against  $[\text{Zn}^{2+}]_{\text{tot}}/[\text{6}]_{\text{tot}}$  ratio at 550 nm.

Model for calculation:

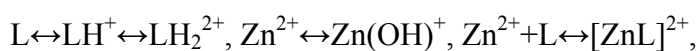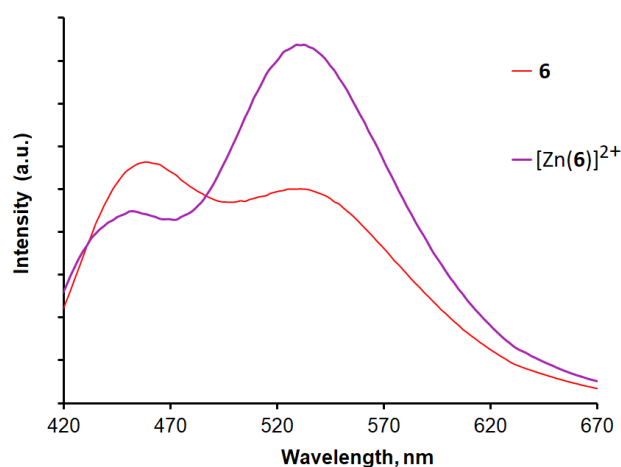

**Figure S48.** Calculated with the Specfit/32 program normalized fluorescence spectra of **6** and  $[\text{Zn}(\text{6})]^{2+}$  in water.

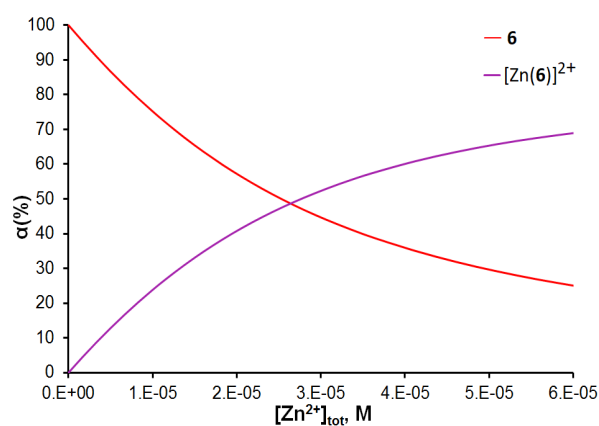

**Figure S49.** Species distribution diagram for the **6**/ $\text{Zn}^{2+}$  system in water calculated with the Specfit/32 program.

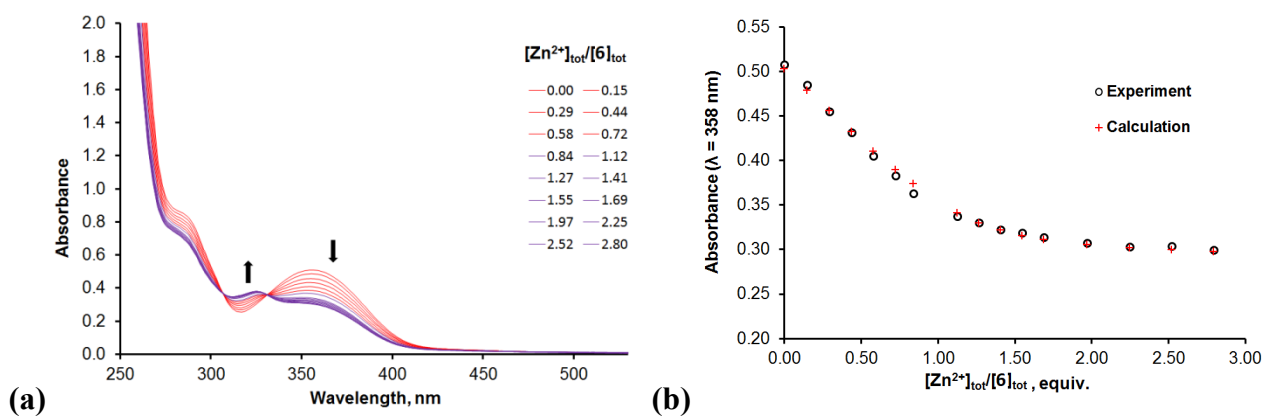

**Figure S50.** (a) Evolution of UV-vis spectrum of **6** ( $[\text{6}] = 160 \mu\text{M}$ ,  $0.03\text{M}$  HEPES buffer,  $\text{pH}=7.4$ ) upon addition of  $\text{Cu}(\text{ClO}_4)_2$  (0–2.8 equiv); (b) Changes of absorbance against  $[\text{Zn}^{2+}]_{\text{tot}}/[\text{6}]_{\text{tot}}$  ratio at  $358 \text{ nm}$ . Model for calculation:  $\text{L} \leftrightarrow \text{LH}^+ \leftrightarrow \text{LH}_2^{2+}$ ,  $\text{Zn}^{2+} \leftrightarrow \text{Zn}(\text{OH})^+$ ,  $\text{Zn}^{2+} + \text{L} \leftrightarrow [\text{ZnL}]^{2+}$ .

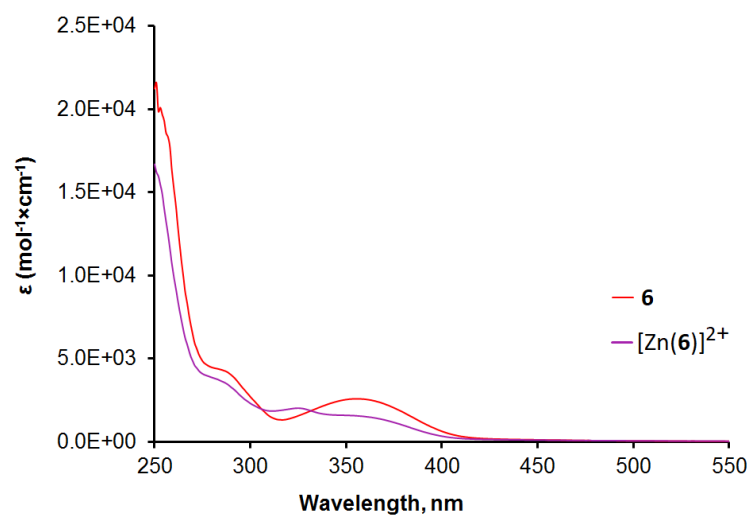

**Figure S51.** UV-vis spectra of **6** and  $[\text{Zn}(\text{6})]^{2+}$  in water calculated with the Specfit/32 program.

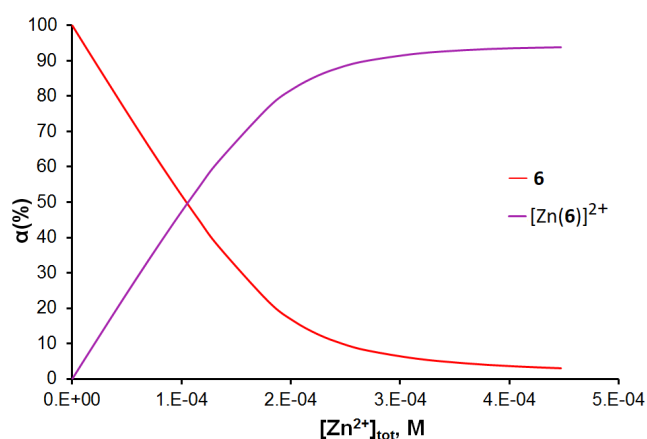

**Figure S52.** Species distribution diagram for the **6**/ $\text{Zn}^{2+}$  system in water calculated with the Specfit/32 program.

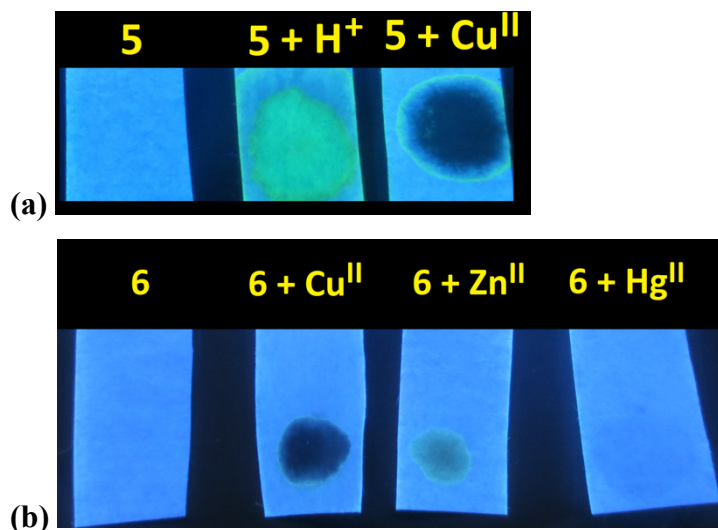

**Figure S53.** (a) Visual detection of Cu<sup>2+</sup> and H<sup>+</sup> using paper stripes with **5**. (b) Visual detection of Cu<sup>2+</sup>, Zn<sup>2+</sup>, Hg<sup>2+</sup> and H<sup>+</sup> using paper stripes with **6**.

#### 4.1. NMR-studies of $[\text{Zn(6)}]^{2+}$ complex

Figure 1 displays seven stacked  $^1\text{H}$  NMR spectra (a-g) of poly(2,2,2-trimethyl-6-oxo-1,2,3,4-tetrahydropyridine) (PMT) in  $\text{CDCl}_3$ . The x-axis represents the chemical shift in ppm, ranging from 8.7 to 6.5. The spectra show the effect of increasing the amount of PMT from 0.05 mmol (a) to 0.50 mmol (g). The peaks are labeled with their chemical shifts in ppm.

- (a) Reference spectrum with peaks at 8.33, 8.32, 7.91, 7.89, 7.63, 7.61, 7.23, 7.22, 7.21, 7.20, 7.14, 7.12, 7.11, and 6.67 ppm.
- (b) Spectrum with 0.05 mmol PMT, showing additional peaks at 8.44, 8.43, 8.01, 7.98, 7.96, 7.71, 7.69, 7.63, 7.60, 7.30, 7.28, 7.24, 7.23, 7.22, 7.21, 7.14, 7.12, 7.00, and 6.67 ppm.
- (c) Spectrum with 0.10 mmol PMT, showing additional peaks at 8.44, 8.43, 8.31, 8.30, 8.01, 7.99, 7.93, 7.91, 7.71, 7.68, 7.62, 7.60, 7.30, 7.29, 7.28, 7.24, 7.23, 7.22, 7.14, 7.11, 7.00, and 6.67 ppm.
- (d) Spectrum with 0.20 mmol PMT, showing additional peaks at 8.43, 8.43, 8.31, 8.30, 8.01, 7.99, 7.94, 7.91, 7.70, 7.68, 7.62, 7.60, 7.30, 7.29, 7.28, 7.24, 7.23, 7.22, 7.14, 7.11, 7.00, and 6.67 ppm.
- (e) Spectrum with 0.30 mmol PMT, showing additional peaks at 8.43, 8.43, 8.30, 8.29, 8.02, 8.00, 7.94, 7.70, 7.68, 7.69, 7.31, 7.30, 7.29, 7.24, 7.23, 7.22, 7.00, and 6.66 ppm.
- (f) Spectrum with 0.40 mmol PMT, showing additional peaks at 8.43, 8.43, 8.30, 8.29, 8.02, 8.00, 7.94, 7.70, 7.68, 7.69, 7.31, 7.30, 7.29, 7.24, 7.23, 7.22, 7.00, and 6.66 ppm.
- (g) Spectrum with 0.50 mmol PMT, showing additional peaks at 8.42, 8.41, 8.00, 7.98, 7.69, 7.66, 7.29, 7.28, 7.27, 7.26, 7.25, 7.24, 7.23, 7.22, 7.20, and 6.96 ppm.

32



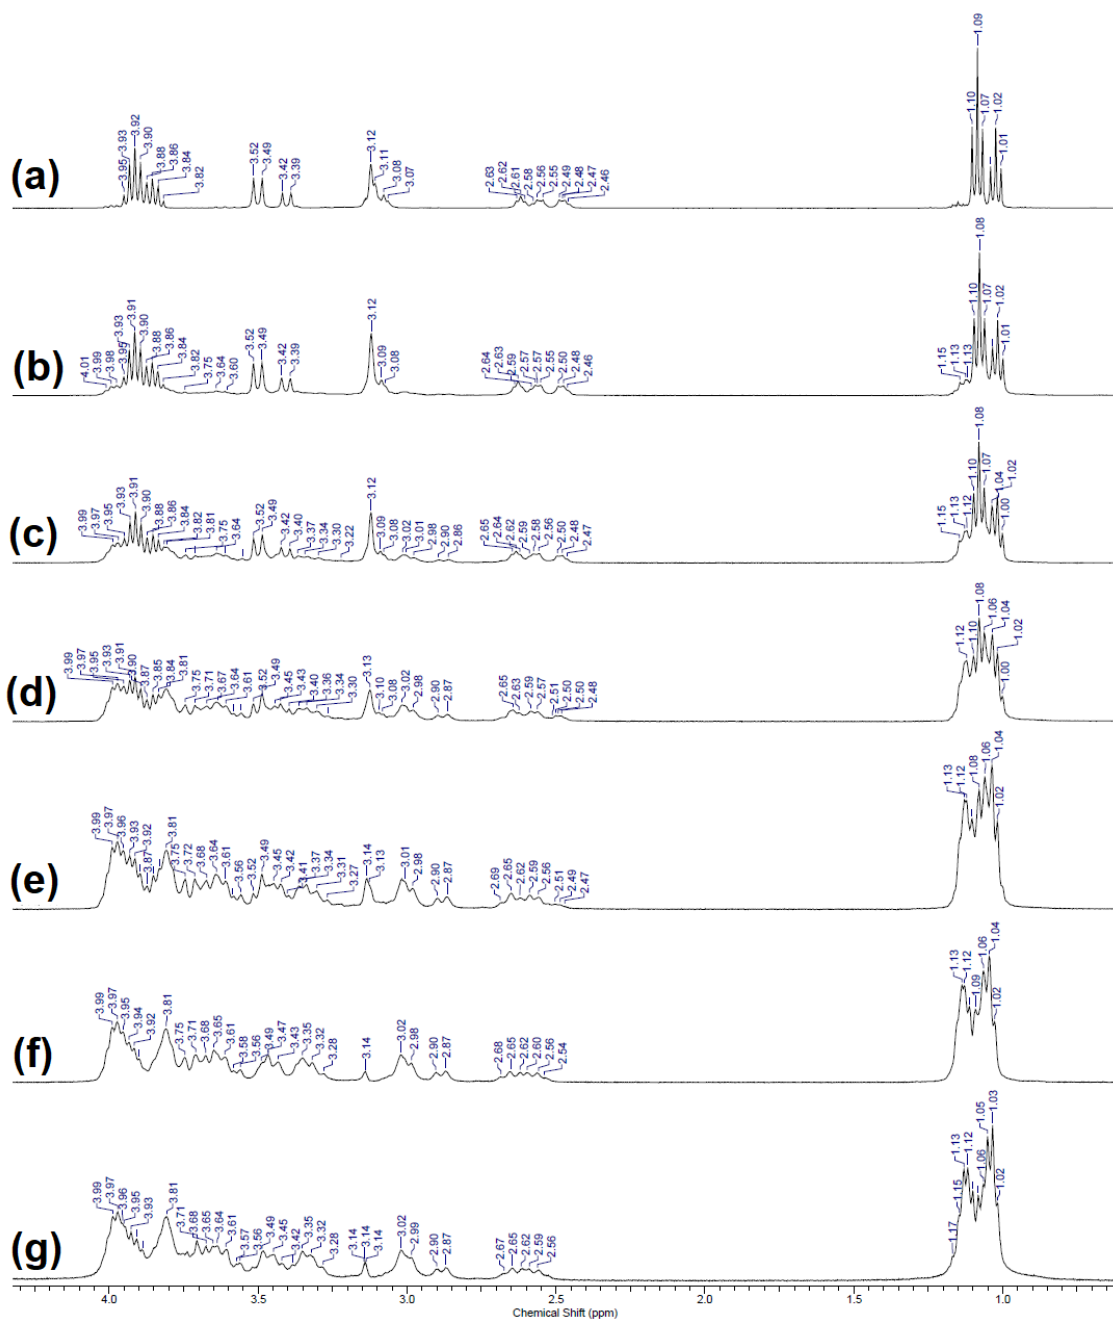

**Figure S55.** 400 MHz  $^1\text{H}$  NMR spectra (aliphatic) of **6** in  $\text{D}_2\text{O}/\text{MeOD}$  (5:1 v/v,  $[\textbf{6}] = 0.04 \text{ M}$ ) at 298 K before (a) and after addition of 0.2 (b), 0.4 (c), 0.6 (d), 0.8 (e), 1.0 (f) and 2.0 (g) equiv of zinc(II) perchlorate.

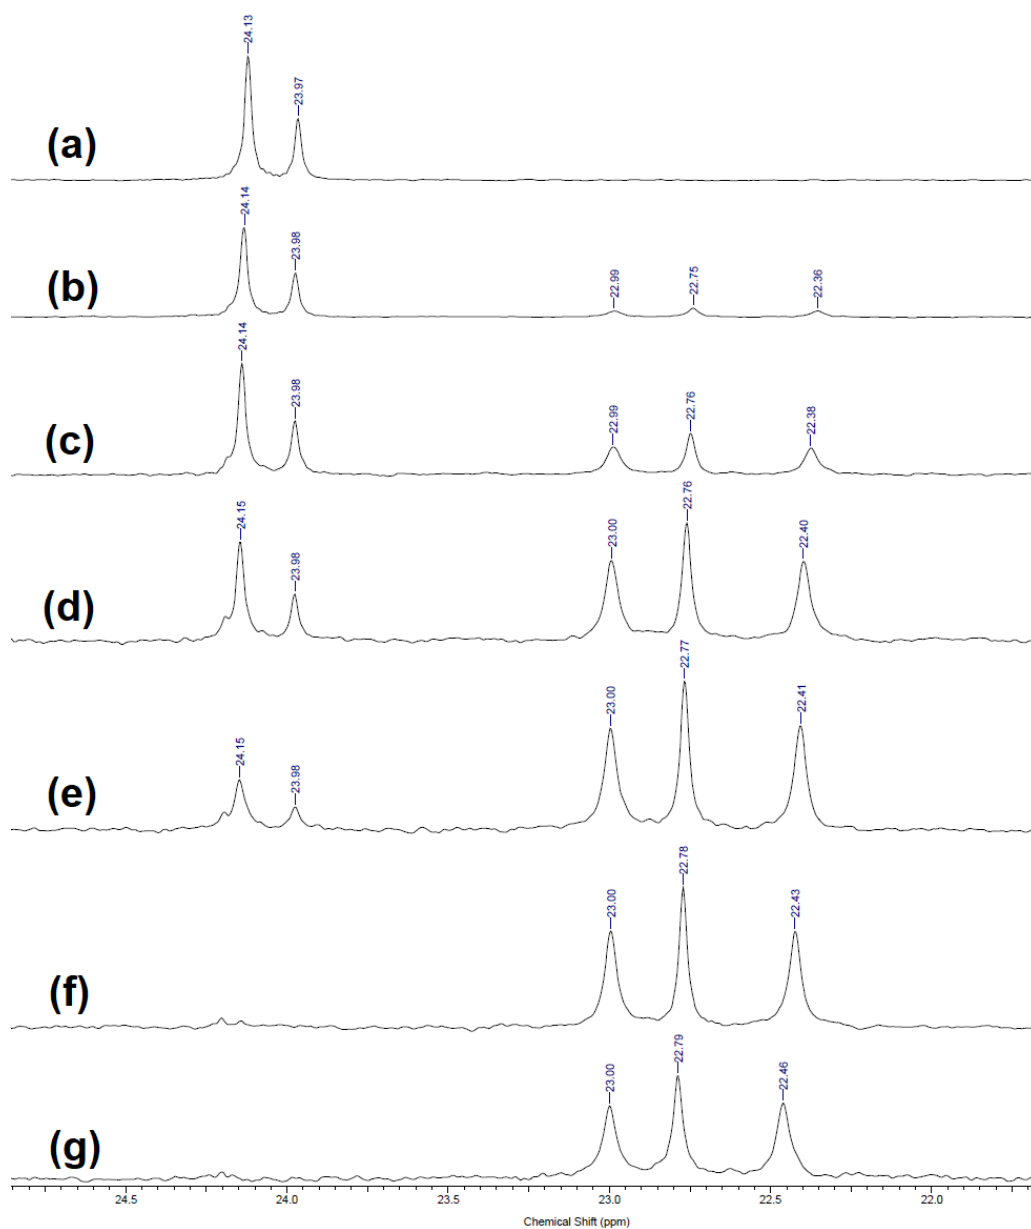

**Figure S56.** 162.5 MHz  $^{31}\text{P}$  NMR spectra of **6** in  $\text{D}_2\text{O}/\text{MeOD}$  (5:1 v/v,  $[\mathbf{6}] = 0.04$  M) at 298 K before (a) and after addition of 0.2 (b), 0.4 (c), 0.6 (d), 0.8 (e), 1.0 (f), and 2.0 (g) equiv of zinc(II) perchlorate.

$^1\text{H}$ - $^1\text{H}$  COSY NMR spectra of  $[\text{Zn}(\mathbf{6})]^{2+}$  complex

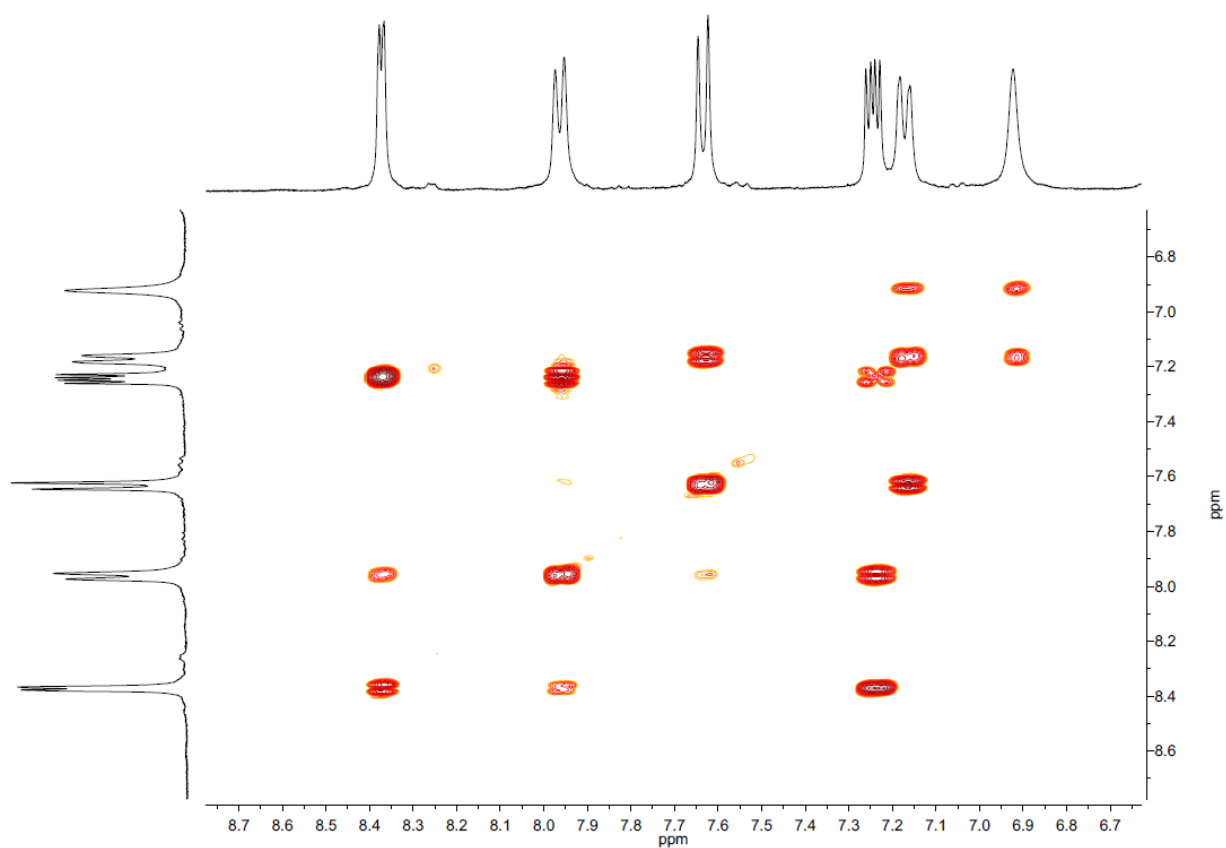

**Figure S57.** Aromatic region of  $^1\text{H}$ - $^1\text{H}$  COSY spectra (400 MHz) of complex  $[\text{Zn}(\mathbf{6})]^{2+}$  in  $\text{D}_2\text{O}/\text{MeOD}$  (5:1 v/v) at 298 K.

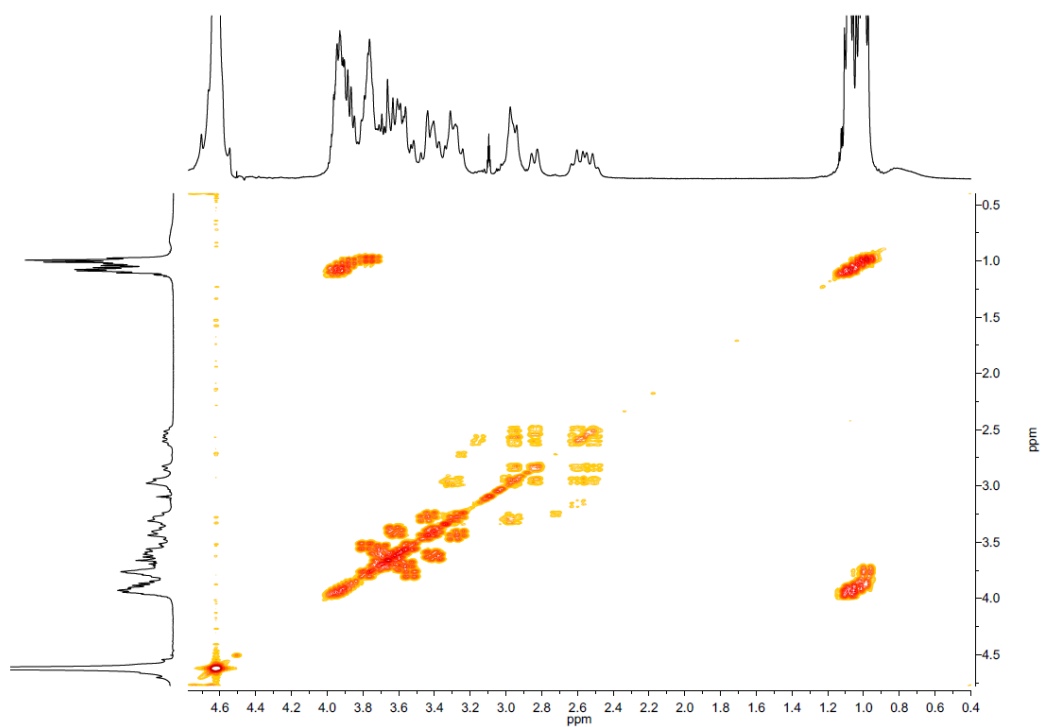

**Figure S58.** Aliphatic region (0.4–4.6 ppm) of  $^1\text{H}$ - $^1\text{H}$  COSY spectra (400 MHz) of complex  $[\text{Zn}(\mathbf{6})]^{2+}$  in  $\text{D}_2\text{O}/\text{MeOD}$  (5:1 v/v) at 298 K.

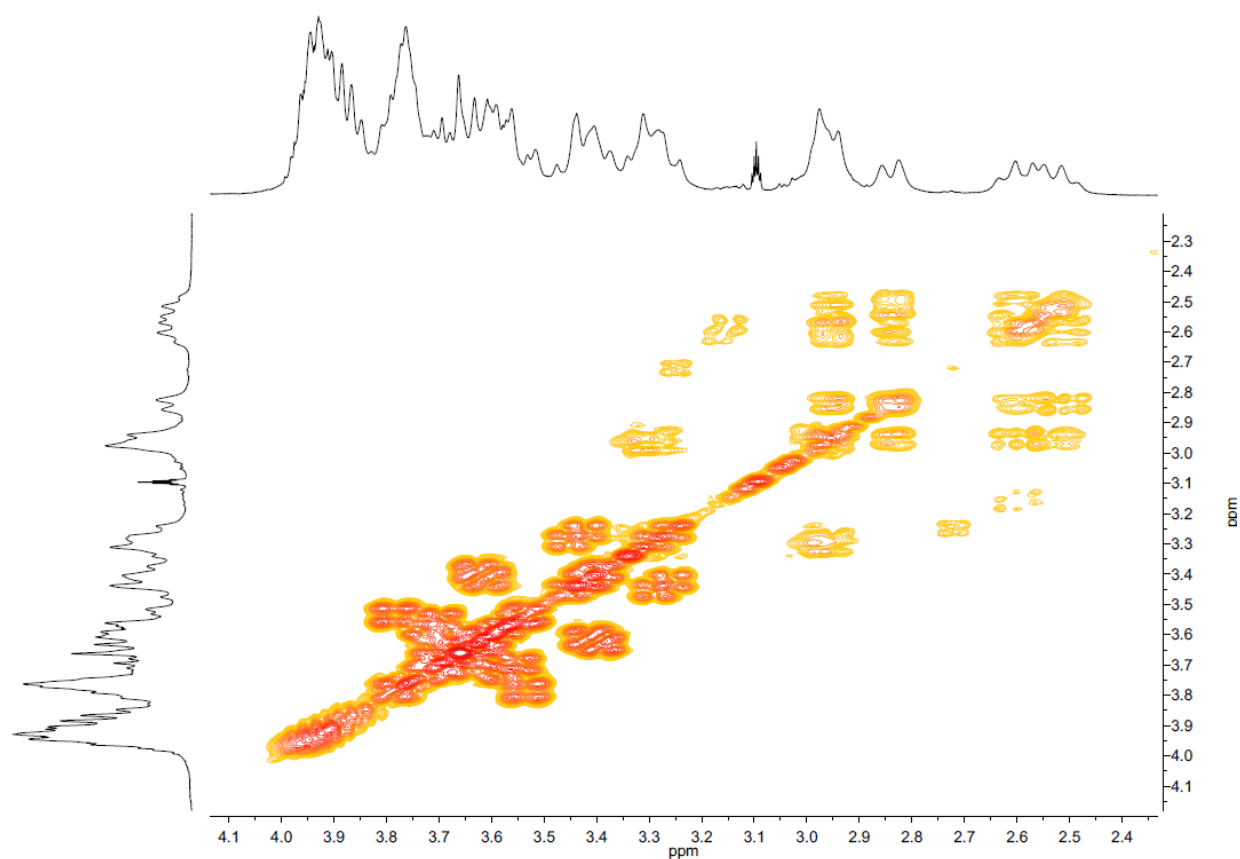

**Figure S59.** Aliphatic region (2.35–4.1 ppm) of  $^1\text{H}$ – $^1\text{H}$  COSY spectra (400 MHz) of complex  $[\text{Zn}(\mathbf{6})]^{2+}$  in  $\text{D}_2\text{O}/\text{MeOD}$  (5:1 v/v) at 298 K.

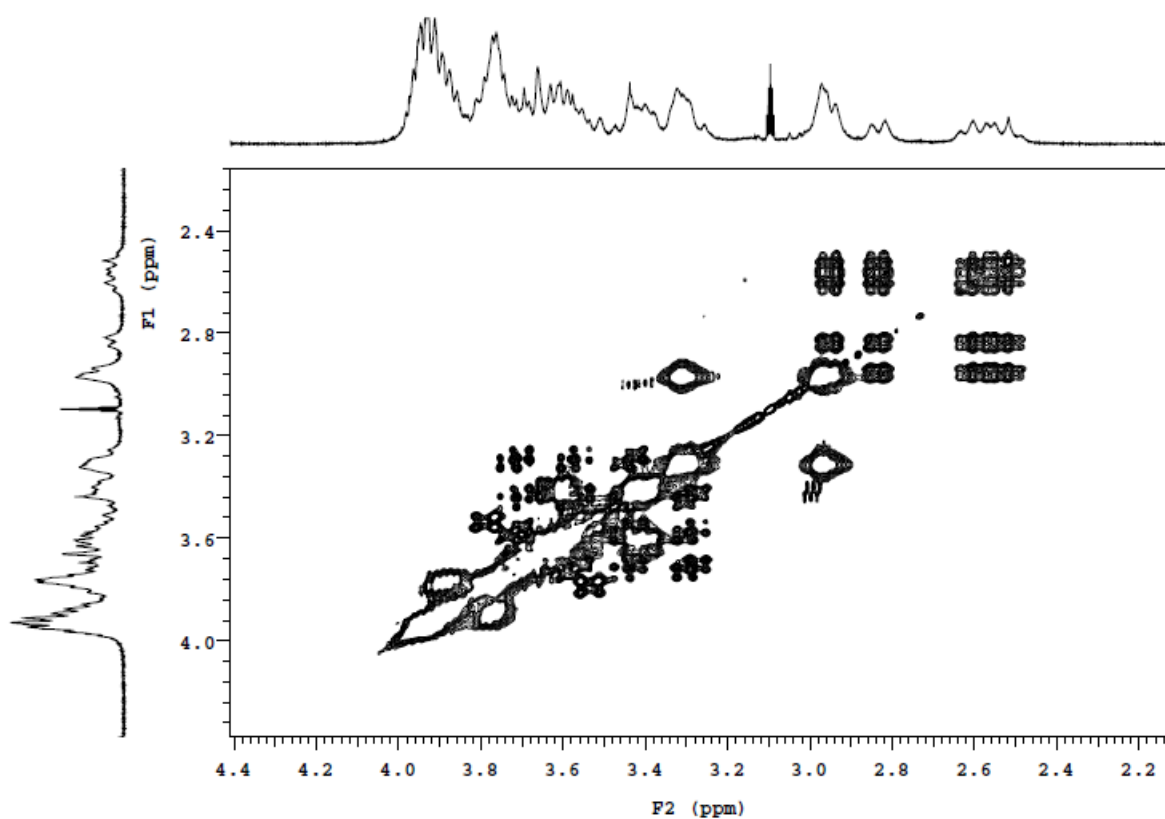

**Figure S60.** Aliphatic region of TOCSY spectra (400 MHz) of complex  $[\text{Zn}(\mathbf{6})]^{2+}$  in  $\text{D}_2\text{O}/\text{MeOD}$  (5:1 v/v) at 298 K.

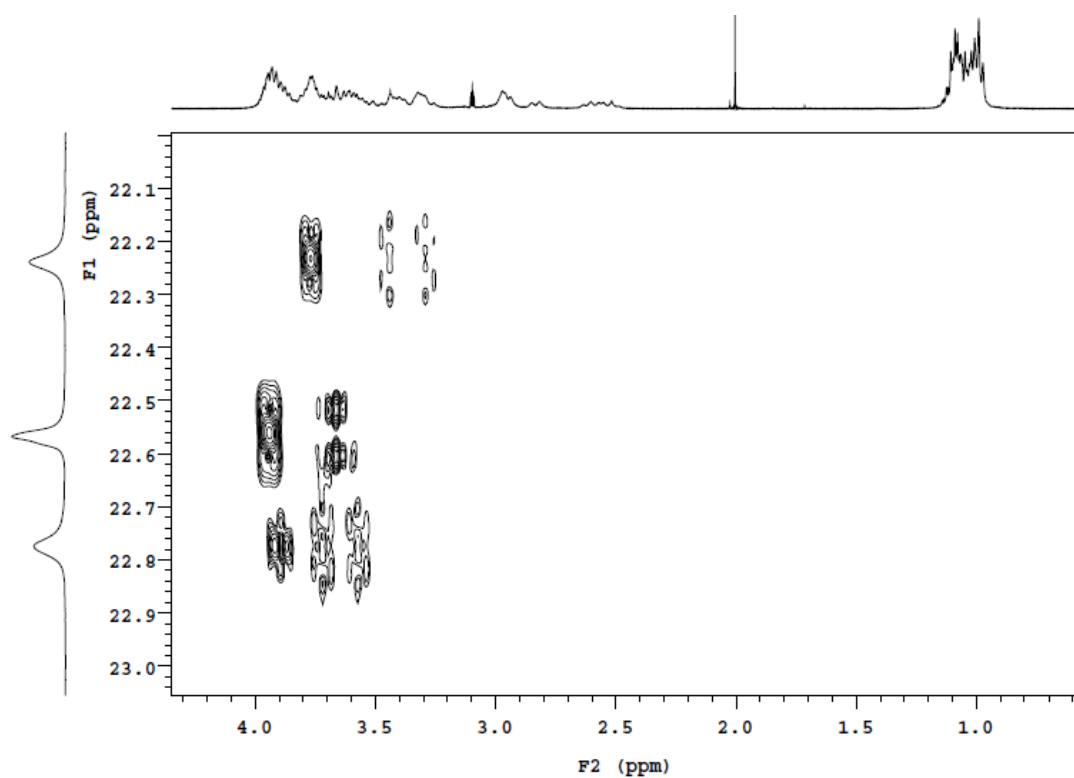

**Figure S61.** Aliphatic region (0.5–4.3 ppm) of gHMBCAD–{ $^1\text{H}$ – $^{31}\text{P}$ } NMR spectra of  $[\text{Zn}(\mathbf{6})]^{2+}$  complex in  $\text{D}_2\text{O}/\text{MeOD}$  (5:1 v/v) at 298 K.

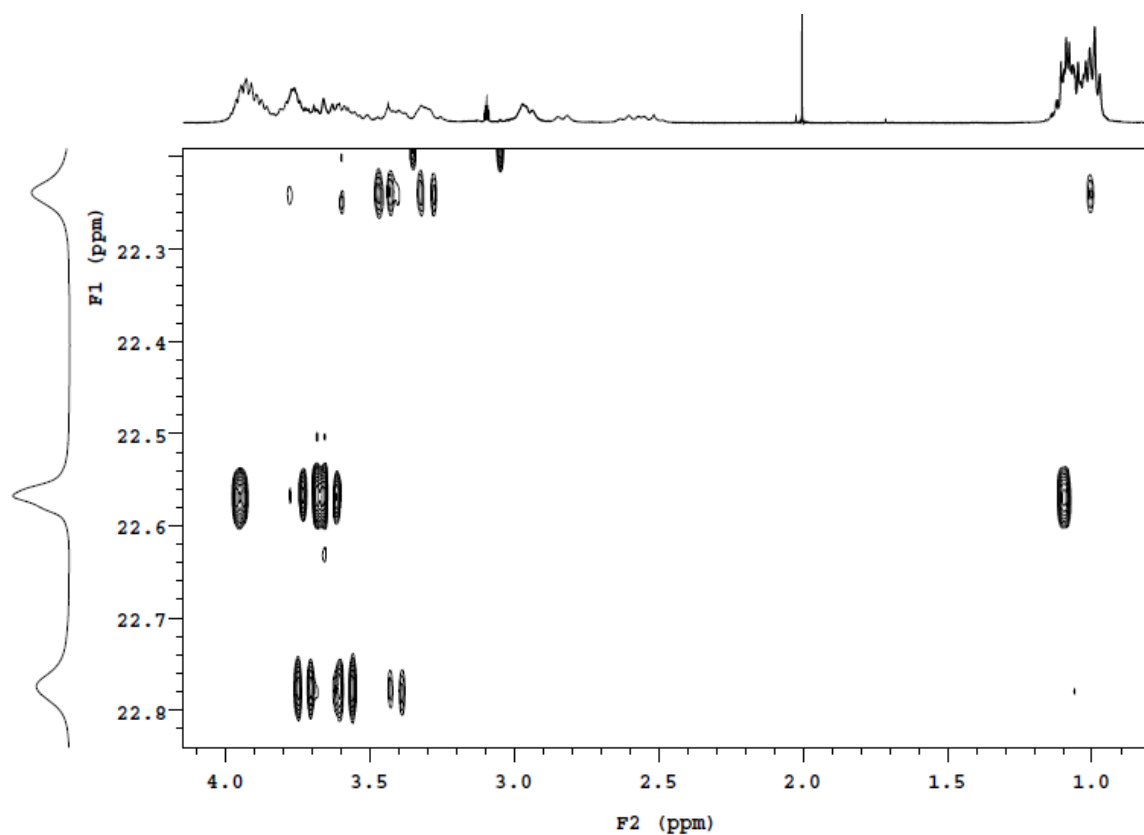

**Figure S62.** Aliphatic region (0.8–4.1 ppm) of LR-HMBCAD–{ $^1\text{H}$ – $^{31}\text{P}$ } NMR spectra of  $[\text{Zn}(\mathbf{6})]^{2+}$  complex in  $\text{D}_2\text{O}/\text{MeOD}$  (5:1 v/v) at 298 K. {R.T. Williamson, A.V. Buevich, G.E. Martin and T. Parella, *J. Org. Chem.*, **2014**, 79, 3887-3894}.



(a)

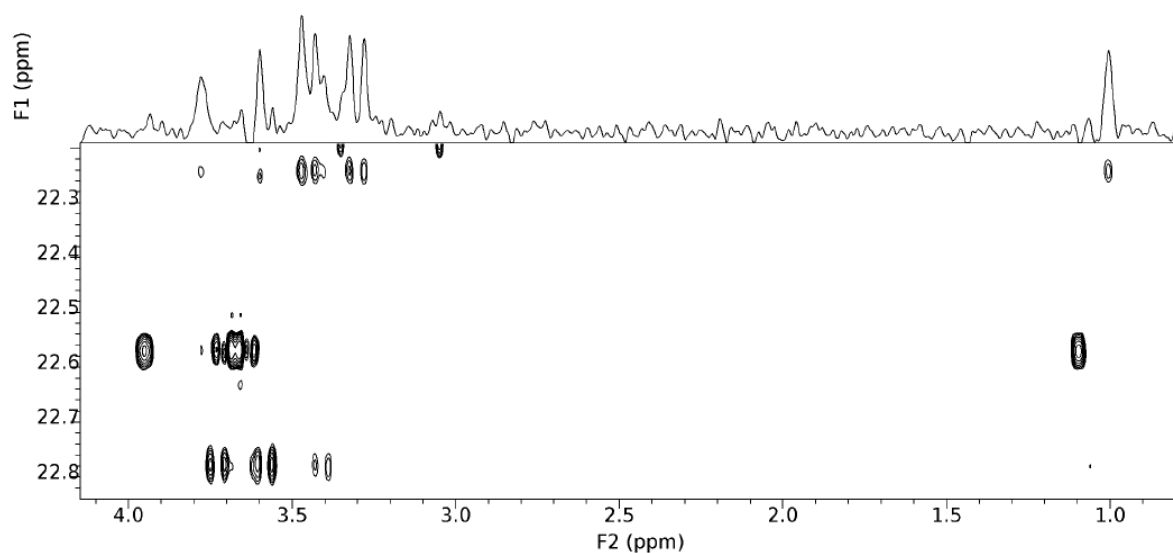

(b)

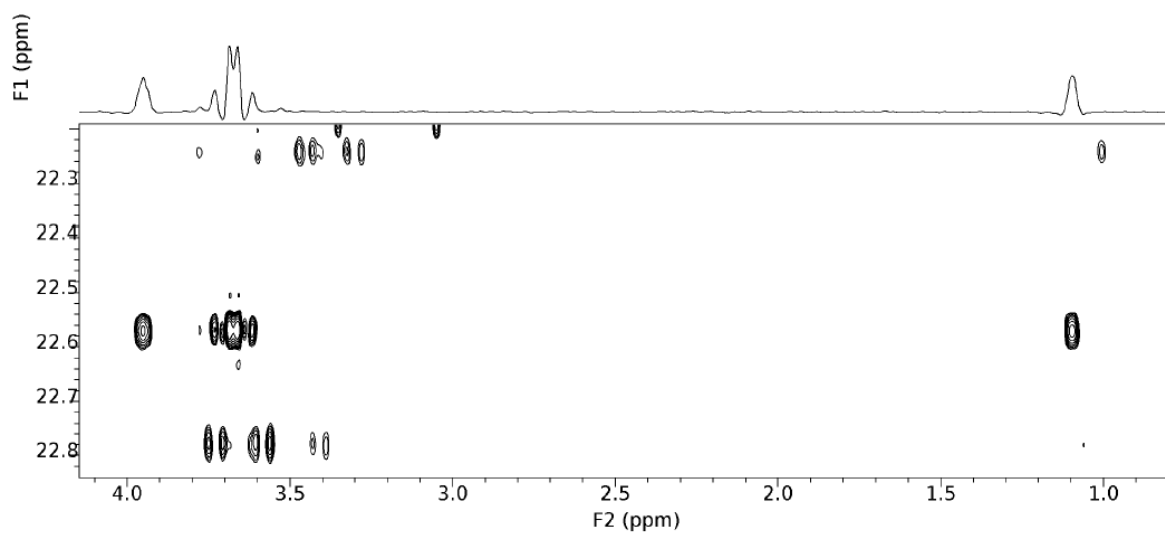

(c)

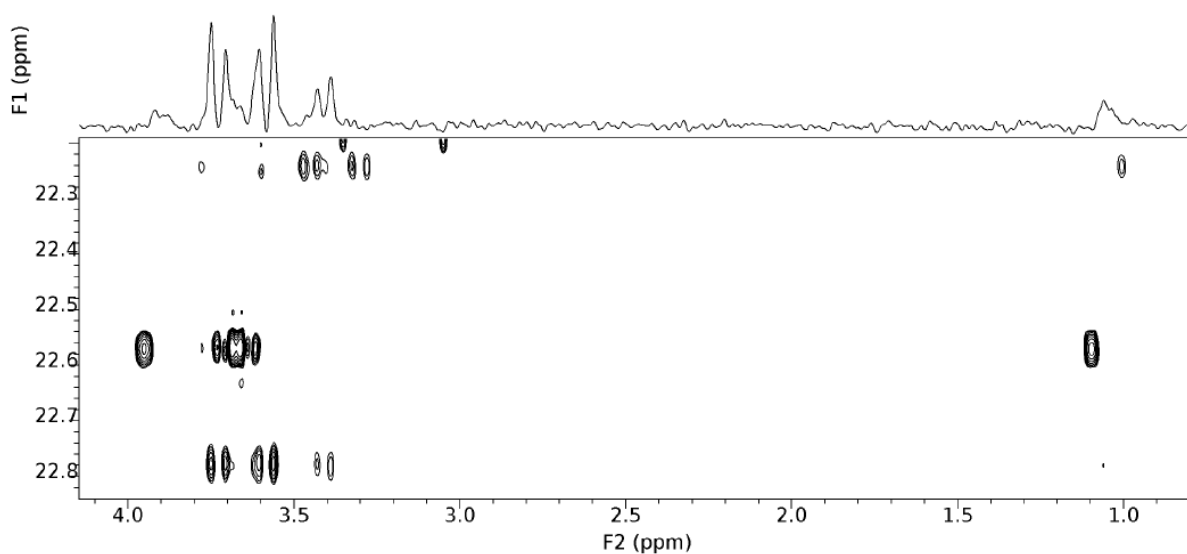

**Figure S63.** Aliphatic region (0.8–4.1 ppm) of LR-HMBCAD- $\{^1\text{H}-^{31}\text{P}\}$  NMR spectra of  $[\text{Zn}(\mathbf{6})]^{2+}$  complex in  $\text{D}_2\text{O}/\text{MeOD}$  (5:1 v/v) at 298 K: correlations of  $^{31}\text{P}$  spectra with Sections of 2D-spectra at  $^{31}\text{P}$  shift 22.2 (a), 22.6 (b) and 22.8 (c) ppm.

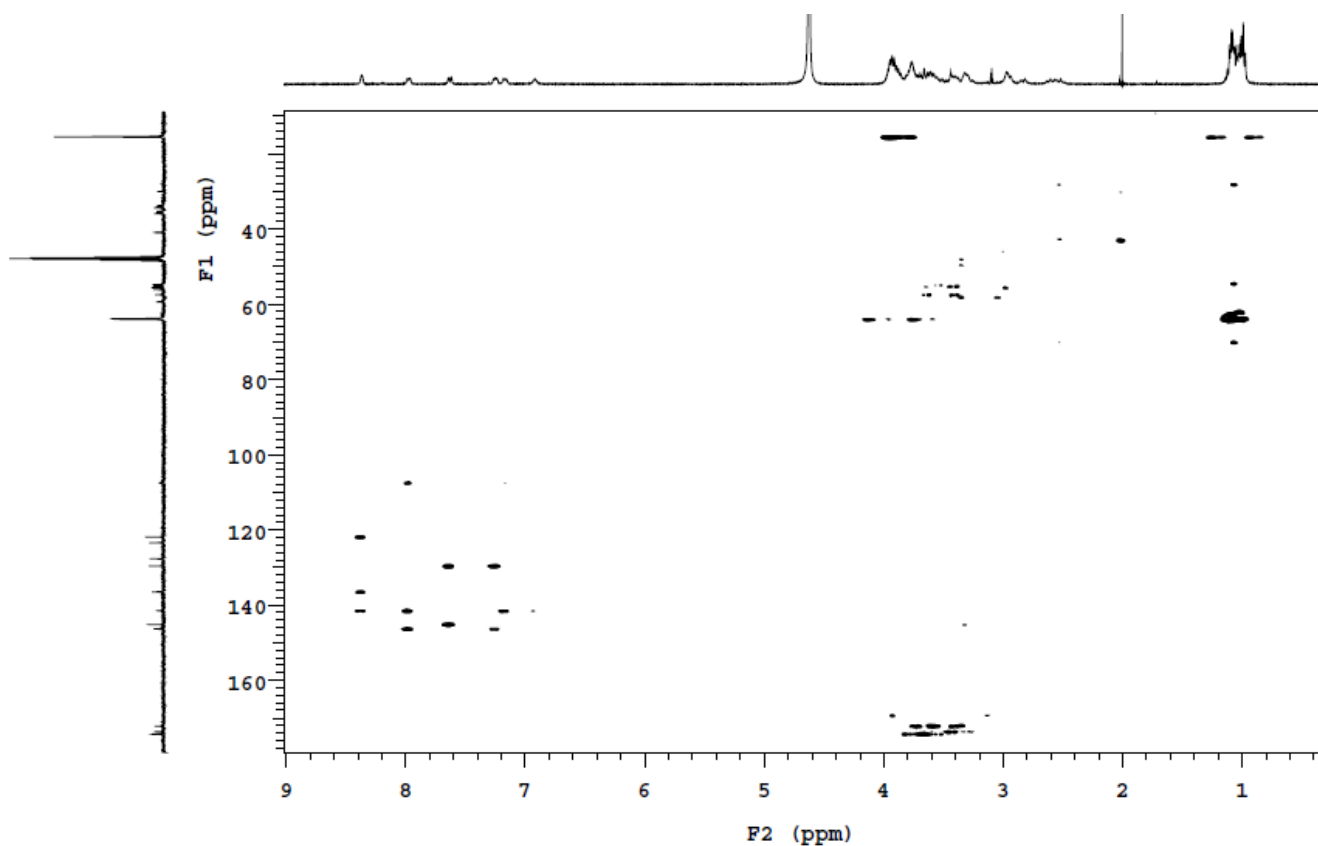

**Figure S64.** gHMBCAD- $\{^1\text{H}-^{13}\text{C}\}$  NMR spectra of  $[\text{Zn}(\mathbf{6})]^{2+}$  complex in  $\text{D}_2\text{O}/\text{MeOD}$  (5:1 v/v) at 298 K.

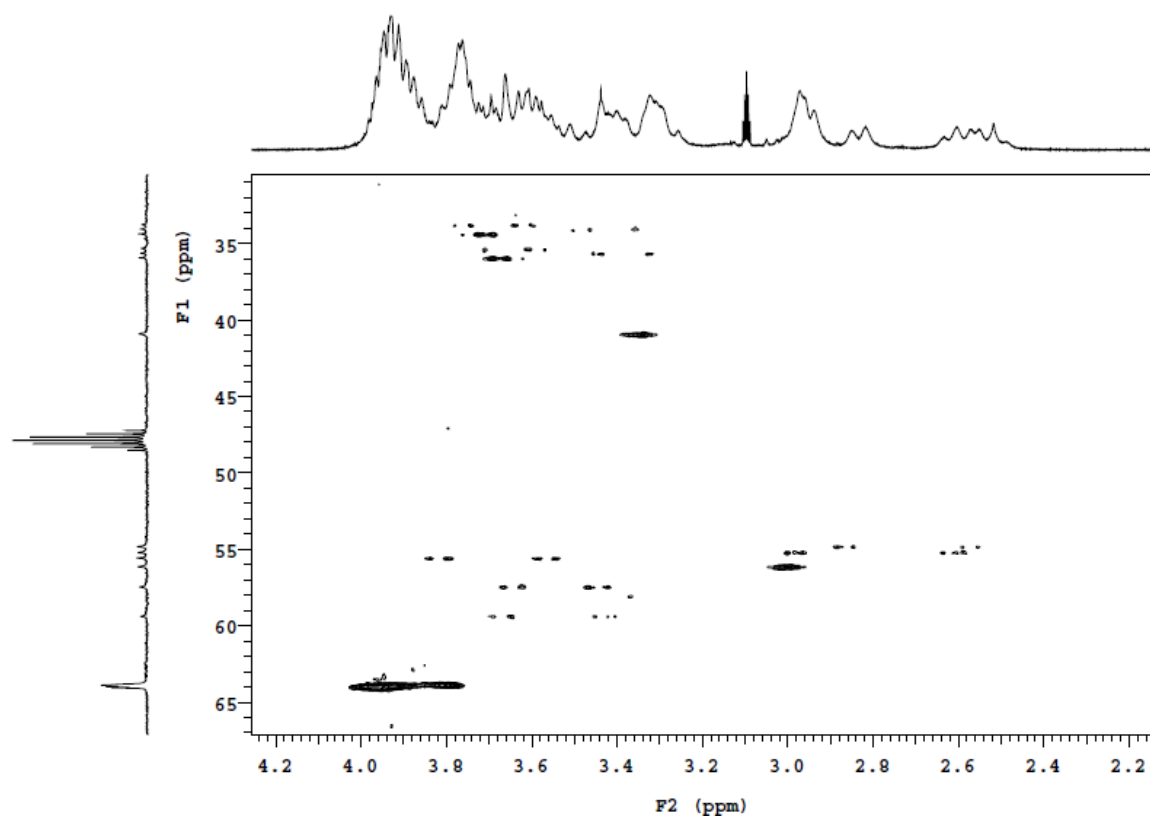

**Figure S65.** Aliphatic region (2.2–4.2 ppm) of gHMQCAD- $\{^1\text{H}-^{13}\text{C}\}$  NMR spectra of  $[\text{Zn}(\mathbf{6})]^{2+}$  complex in  $\text{D}_2\text{O}/\text{MeOD}$  (5:1 v/v) at 298 K.



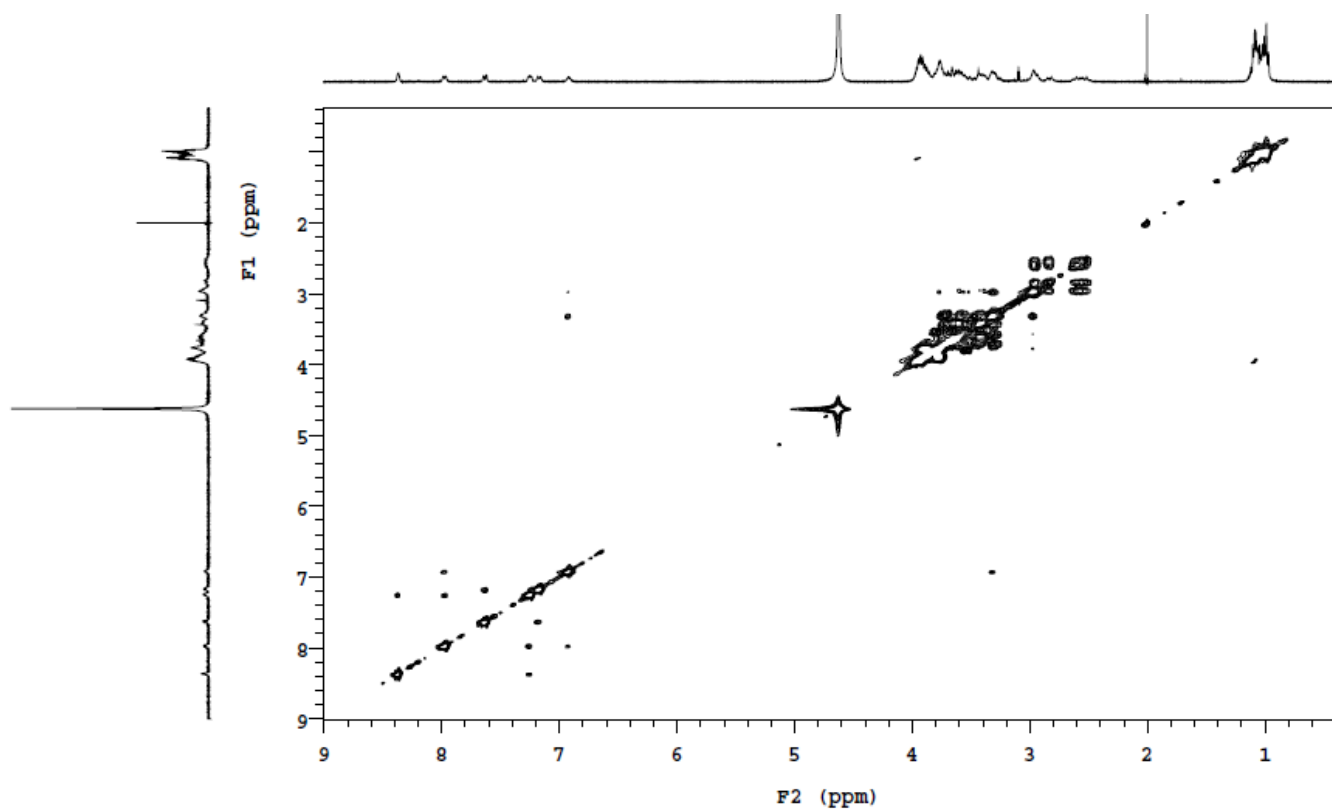

**Figure S66.** NOESY spectra of  $[\text{Zn}(\mathbf{6})]^{2+}$  complex in  $\text{D}_2\text{O}/\text{MeOD}$  (5:1 v/v) at 298 K.

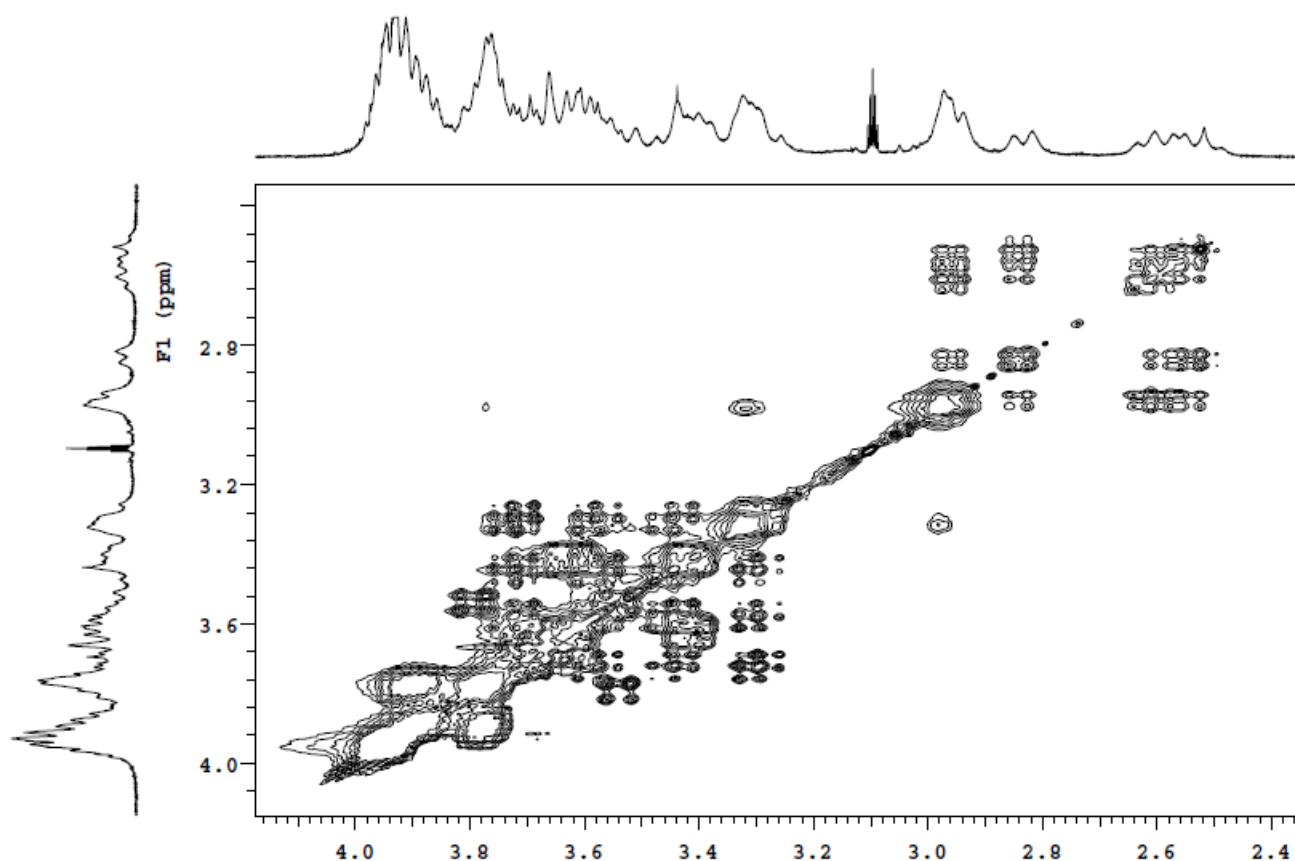

**Figure S67.** Aliphatic region (2.4–4.0 ppm) of NOESY spectra of  $[\text{Zn}(\mathbf{6})]^{2+}$  complex in  $\text{D}_2\text{O}/\text{MeOD}$  (5:1 v/v) at 298 K.

**Table S1.** Assignment of signals in  $^1\text{H}$  NMR spectrum of  $[\text{Zn}(\mathbf{6})]^{2+}$ .

| Assignment* | Chemical shift (ppm) |                 |                 | <i>J</i> (Hz) |      |      |
|-------------|----------------------|-----------------|-----------------|---------------|------|------|
|             | $^1\text{H}$         | $^{13}\text{C}$ | $^{31}\text{P}$ | H-H           | H-P  | C-P  |
| 2           | 8.38                 | 146.32          |                 | -             |      |      |
| 3           | 7.27                 | 121.89          |                 | -             |      |      |
| 4           | 7.99                 | 136.51          |                 | -             |      |      |
| 5           |                      | 129.61          |                 |               |      |      |
| 6           | 6.94                 | 107.49          |                 | -             |      |      |
| 7           |                      | 145.18          |                 |               |      |      |
| 8           | 7.18                 | 123.43          |                 | -             |      |      |
| 9           | 7.65                 | 127.68          |                 | -             |      |      |
| 10          |                      | 141.5           |                 |               |      |      |
| 12          | 3.32                 | 3.32            | 40.924          | <0.1          |      |      |
| 13          | 2.98                 | 2.98            | 56.138          | <0.1          |      |      |
| 15          | 2.84                 | 2.54            | 54.833          | 14.8          |      |      |
| 16          | 2.96                 | 2.59            | 55.205          | 12.8          |      |      |
| 18          | 3.62                 | 3.42            | 57.47           | 17.2          |      |      |
| 19          |                      | 173.67          |                 |               |      |      |
| 21          | 3.79                 | 3.54            | 55.57           | 17.4          |      |      |
| 22          |                      | 174.31          |                 |               |      | 4.14 |
| 24          | 3.64                 | 3.40            | 59.39           | 16.8          |      |      |
| 25          |                      | 172.21          |                 |               |      |      |
| 28          | 3.44                 | 3.30            | 34.85           | 14.4          | 12.2 | 157  |
| 29          |                      |                 | 22.22           |               |      |      |
| 31,46       | 3.77                 | 63.89           |                 |               |      |      |
| 32,47       | 0.99                 | 15.5            |                 |               |      |      |
| 34          | 3.69                 | 3.64            | 35.15           | 15.6          | 12.4 | 157  |
| 35          |                      |                 | 22.57           |               |      |      |
| 37,50       | 3.94                 | 64.03           |                 |               |      | 6.95 |
| 38,51       | 1.08                 | 15.5            |                 |               |      |      |
| 40          | 3.7                  | 3.58            | 34.55           | 16            | 11.6 | 157  |
| 41          |                      |                 | 22.85           |               |      |      |
| 43,54       | 3.90                 | 63.92           |                 |               |      |      |
| 44,55       | 1.03                 | 15.5            |                 |               |      |      |

\* Chemical shifts of the proton and carbon atoms were obtained from gHSCAD (at = 0.5s) and LR-HSQMBC (at=0.3s). The assignment was provided using gHMBCAD, NOESY and gCOSY-spectra (Figs. S59-67).

## 4.2. DFT-calculation studies of $[\text{Zn(6)}]^{2+}$ complex

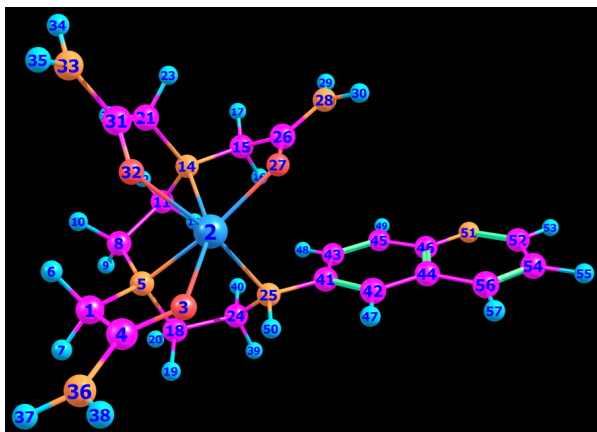

**Figure S68.** The structure of model **M1** (hydrogen atoms and phosphonate pendant arms are omitted) of Zn complex of ligand **6** obtained by full geometry optimization at B3LYP/6-31G(d,p) level.

| COORD 1 |          | -----<br>NUCLEAR COORDINATES<br>----- |           |           |
|---------|----------|---------------------------------------|-----------|-----------|
| VIB 1   |          |                                       |           |           |
|         | ATOM     | X                                     | Y         | Z         |
| 1       | CARBON   | 28.567741                             | 5.070436  | 15.070565 |
| 2       | ZINC     | 23.810598                             | 7.899411  | 14.818165 |
| 3       | OXYGEN   | 24.209790                             | 4.068907  | 14.128771 |
| 4       | CARBON   | 26.445092                             | 3.307599  | 14.175834 |
| 5       | NITROGEN | 27.486915                             | 7.091643  | 16.662026 |
| 6       | HYDROGEN | 29.397535                             | 5.902003  | 13.371504 |
| 7       | HYDROGEN | 30.057261                             | 4.002057  | 16.042027 |
| 8       | CARBON   | 28.993470                             | 9.462507  | 16.631239 |
| 9       | HYDROGEN | 30.421591                             | 9.470384  | 18.134982 |
| 10      | HYDROGEN | 30.024969                             | 9.534807  | 14.842254 |
| 11      | CARBON   | 27.364915                             | 11.860490 | 16.892788 |
| 12      | HYDROGEN | 28.614266                             | 13.514983 | 16.798386 |
| 13      | HYDROGEN | 26.457499                             | 11.911473 | 18.743713 |
| 14      | NITROGEN | 25.348080                             | 11.972107 | 14.944429 |
| 15      | CARBON   | 23.090692                             | 13.437974 | 15.650325 |
| 16      | HYDROGEN | 22.777242                             | 13.280493 | 17.688059 |
| 17      | HYDROGEN | 23.263618                             | 15.456989 | 15.209334 |
| 18      | CARBON   | 26.918724                             | 6.097611  | 19.246462 |
| 19      | HYDROGEN | 26.768281                             | 4.041063  | 19.105071 |
| 20      | HYDROGEN | 28.491252                             | 6.485273  | 20.540012 |
| 21      | CARBON   | 26.289528                             | 12.669092 | 12.411826 |
| 22      | HYDROGEN | 28.229143                             | 13.392239 | 12.524368 |
| 23      | HYDROGEN | 25.150894                             | 14.203631 | 11.616215 |
| 24      | CARBON   | 24.462303                             | 7.122604  | 20.375034 |
| 25      | NITROGEN | 22.356033                             | 6.895581  | 18.531550 |
| 26      | CARBON   | 20.753281                             | 12.278084 | 14.380956 |
| 27      | OXYGEN   | 20.757410                             | 9.997473  | 13.771079 |
| 28      | NITROGEN | 18.762461                             | 13.759222 | 14.006525 |
| 29      | HYDROGEN | 18.740152                             | 15.598580 | 14.519111 |
| 30      | HYDROGEN | 17.145064                             | 12.995789 | 13.323340 |
| 31      | CARBON   | 26.246105                             | 10.446160 | 10.553899 |
| 32      | OXYGEN   | 25.592897                             | 8.298375  | 11.252794 |
| 33      | NITROGEN | 26.983945                             | 10.924681 | 8.194682  |
| 34      | HYDROGEN | 27.517891                             | 12.663781 | 7.604729  |
| 35      | HYDROGEN | 26.941950                             | 9.515491  | 6.900942  |
| 36      | NITROGEN | 27.084856                             | 0.993364  | 13.439054 |
| 37      | HYDROGEN | 28.881313                             | 0.350377  | 13.516631 |
| 38      | HYDROGEN | 25.742587                             | -0.165547 | 12.717686 |
| 39      | HYDROGEN | 24.044101                             | 6.092793  | 22.123173 |
| 40      | HYDROGEN | 24.673697                             | 9.103979  | 20.893811 |
| 41      | CARBON   | 19.914766                             | 7.862138  | 19.377096 |
| 42      | CARBON   | 17.758303                             | 6.547756  | 18.733411 |
| 43      | CARBON   | 19.734616                             | 10.160587 | 20.747311 |
| 44      | CARBON   | 15.336846                             | 7.484009  | 19.395310 |
| 45      | CARBON   | 17.400664                             | 11.110155 | 21.404475 |
| 46      | CARBON   | 15.147152                             | 9.822623  | 20.736887 |
| 47      | HYDROGEN | 17.886172                             | 4.772163  | 17.702660 |
| 48      | HYDROGEN | 21.415048                             | 11.155093 | 21.373647 |
| 49      | HYDROGEN | 17.220045                             | 12.843807 | 22.483825 |
| 50      | HYDROGEN | 22.100742                             | 5.013880  | 18.185896 |
| 51      | NITROGEN | 12.897740                             | 10.867204 | 21.428398 |
| 52      | CARBON   | 10.822640                             | 9.622673  | 20.840565 |
| 53      | HYDROGEN | 9.045731                              | 10.482956 | 21.414893 |
| 54      | CARBON   | 10.796792                             | 7.277059  | 19.530863 |
| 55      | HYDROGEN | 9.007449                              | 6.363479  | 19.125069 |

|    |          |           |          |           |
|----|----------|-----------|----------|-----------|
| 56 | CARBON   | 13.047930 | 6.212121 | 18.802489 |
| 57 | HYDROGEN | 13.100220 | 4.424057 | 17.795396 |

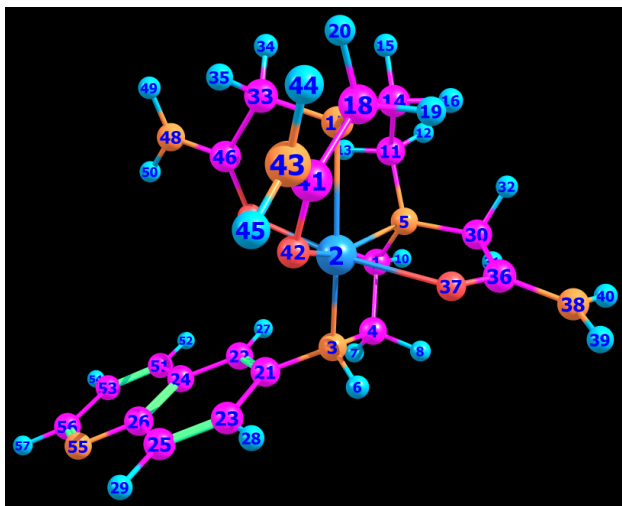

**Figure S69.** The structure of model **M2** (hydrogen atoms and phosphonate pendant arms are omitted) of Zn complex of ligand **6** obtained by full geometry optimization at B3LYP/6-31G(d,p) level.

| COORD 3 |          | NUCLEAR COORDINATES |           |           |
|---------|----------|---------------------|-----------|-----------|
| VIB 1   |          |                     |           |           |
|         | ATOM     | X                   | Y         | Z         |
| 1       | CARBON   | 4.995841            | 6.172709  | 2.693548  |
| 2       | ZINC     | 3.727122            | 8.611654  | 7.315908  |
| 3       | NITROGEN | 3.782732            | 4.654839  | 7.035271  |
| 4       | CARBON   | 5.166810            | 4.038590  | 4.649561  |
| 5       | NITROGEN | 5.933712            | 8.600984  | 3.775121  |
| 6       | HYDROGEN | 4.895786            | 4.090178  | 8.501602  |
| 7       | HYDROGEN | 4.444615            | 2.287398  | 3.827388  |
| 8       | HYDROGEN | 7.140996            | 3.677389  | 5.145689  |
| 9       | HYDROGEN | 3.025511            | 6.461654  | 2.151884  |
| 10      | HYDROGEN | 6.054876            | 5.639507  | 0.991114  |
| 11      | CARBON   | 5.113142            | 10.895263 | 2.383673  |
| 12      | HYDROGEN | 6.335093            | 11.280969 | 0.752563  |
| 13      | HYDROGEN | 3.223861            | 10.537069 | 1.635724  |
| 14      | CARBON   | 5.090883            | 13.229625 | 4.118474  |
| 15      | HYDROGEN | 4.577148            | 14.898619 | 2.998734  |
| 16      | HYDROGEN | 6.992187            | 13.577583 | 4.848027  |
| 17      | NITROGEN | 3.377869            | 12.894840 | 6.314252  |
| 18      | CARBON   | 4.191854            | 14.105375 | 8.677708  |
| 19      | HYDROGEN | 6.258058            | 14.106582 | 8.763989  |
| 20      | HYDROGEN | 3.568689            | 16.077368 | 8.845625  |
| 21      | CARBON   | 1.328538            | 3.438447  | 7.445446  |
| 22      | CARBON   | -0.186508           | 2.603114  | 5.506238  |
| 23      | CARBON   | 0.542361            | 3.210878  | 9.998637  |
| 24      | CARBON   | -2.565823           | 1.481425  | 6.052718  |
| 25      | CARBON   | -1.752392           | 2.139846  | 10.569587 |
| 26      | CARBON   | -3.370424           | 1.250111  | 8.621028  |
| 27      | HYDROGEN | 0.373123            | 2.775271  | 3.540161  |
| 28      | HYDROGEN | 1.775793            | 3.862793  | 11.508443 |
| 29      | HYDROGEN | -2.380954           | 1.922097  | 12.507787 |
| 30      | CARBON   | 8.682281            | 8.562019  | 4.235889  |
| 31      | HYDROGEN | 9.594215            | 7.013882  | 3.204902  |
| 32      | HYDROGEN | 9.557673            | 10.302316 | 3.535163  |
| 33      | CARBON   | 0.704727            | 13.402407 | 5.731418  |
| 34      | HYDROGEN | 0.509738            | 14.754913 | 4.169847  |
| 35      | HYDROGEN | -0.224817           | 14.259854 | 7.369907  |
| 36      | CARBON   | 9.284903            | 8.356908  | 7.060866  |
| 37      | OXYGEN   | 7.577465            | 8.616459  | 8.661910  |
| 38      | NITROGEN | 11.683951           | 7.941464  | 7.703635  |
| 39      | HYDROGEN | 12.154454           | 7.838865  | 9.555741  |
| 40      | HYDROGEN | 13.075149           | 7.715624  | 6.414330  |
| 41      | CARBON   | 3.268072            | 12.528511 | 10.933905 |
| 42      | OXYGEN   | 2.802898            | 10.229797 | 10.665397 |
| 43      | NITROGEN | 3.029453            | 13.685862 | 13.148835 |
| 44      | HYDROGEN | 3.377605            | 15.549523 | 13.377503 |
| 45      | HYDROGEN | 2.542902            | 12.663919 | 14.693206 |
| 46      | CARBON   | -0.738682           | 10.972604 | 5.111168  |
| 47      | OXYGEN   | 0.258682            | 8.867567  | 5.447328  |
| 48      | NITROGEN | -3.076450           | 11.218161 | 4.216753  |
| 49      | HYDROGEN | -3.901530           | 12.917407 | 3.935062  |
| 50      | HYDROGEN | -4.123268           | 9.647282  | 3.903048  |
| 51      | CARBON   | -4.218858           | 0.551651  | 4.156021  |
| 52      | HYDROGEN | -3.679241           | 0.670880  | 2.177831  |
| 53      | CARBON   | -6.480419           | -0.509220 | 4.864335  |
| 54      | HYDROGEN | -7.789519           | -1.253288 | 3.473512  |
| 55      | NITROGEN | -5.622819           | 0.205071  | 9.294585  |
| 56      | CARBON   | -7.098987           | -0.634777 | 7.472712  |

|    |          |           |           |          |
|----|----------|-----------|-----------|----------|
| 57 | HYDROGEN | -8.886530 | -1.467866 | 8.063967 |
|----|----------|-----------|-----------|----------|

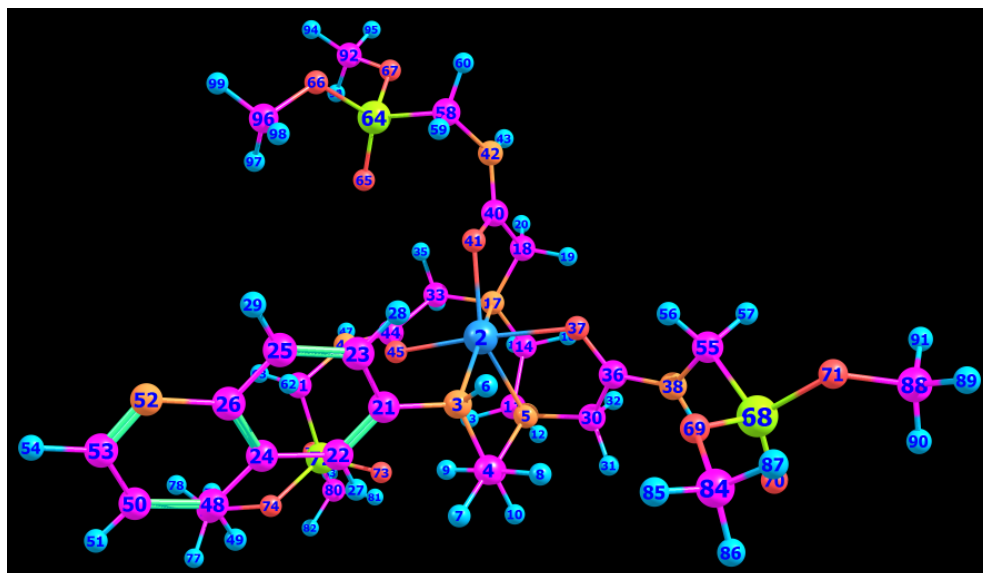

**Figure S70.** The optimized structure (B3LYP/6-31G(d,p)) of methyl analogue of  $\text{Zn}^{\text{II}}$  complex with ligand **6**.

COORD 2

NUCLEAR COORDINATES

VIB 1

| ATOM        | X         | Y         | Z         |
|-------------|-----------|-----------|-----------|
| 1 CARBON    | 4.058382  | 4.690461  | 1.323544  |
| 2 ZINC      | 2.896477  | 7.117825  | 6.029103  |
| 3 NITROGEN  | 3.044570  | 3.097994  | 5.697966  |
| 4 CARBON    | 4.398986  | 2.583033  | 3.268971  |
| 5 NITROGEN  | 4.879492  | 7.166838  | 2.387838  |
| 6 HYDROGEN  | 4.228647  | 2.598604  | 7.130536  |
| 7 HYDROGEN  | 3.745344  | 0.787693  | 2.461424  |
| 8 HYDROGEN  | 6.400009  | 2.314272  | 3.719779  |
| 9 HYDROGEN  | 2.079404  | 4.874512  | 0.766010  |
| 10 HYDROGEN | 5.143232  | 4.219167  | -0.382641 |
| 11 CARBON   | 3.872846  | 9.381759  | 0.987064  |
| 12 HYDROGEN | 5.014165  | 9.798833  | -0.695389 |
| 13 HYDROGEN | 1.984659  | 8.888114  | 0.311289  |
| 14 CARBON   | 3.814216  | 11.745701 | 2.679975  |
| 15 HYDROGEN | 3.043520  | 13.335756 | 1.593246  |
| 16 HYDROGEN | 5.737361  | 12.284106 | 3.211080  |
| 17 NITROGEN | 2.364049  | 11.324341 | 5.040652  |
| 18 CARBON   | 3.391154  | 12.557988 | 7.309313  |
| 19 HYDROGEN | 5.453594  | 12.413341 | 7.275437  |
| 20 HYDROGEN | 2.894048  | 14.568526 | 7.443426  |
| 21 CARBON   | 0.690544  | 1.742976  | 6.130979  |
| 22 CARBON   | -0.884922 | 1.000586  | 4.198594  |
| 23 CARBON   | 0.044259  | 1.239359  | 8.685203  |
| 24 CARBON   | -3.166234 | -0.302727 | 4.754099  |
| 25 CARBON   | -2.160487 | -0.001849 | 9.266050  |
| 26 CARBON   | -3.828439 | -0.808014 | 7.323763  |
| 27 HYDROGEN | -0.450238 | 1.401345  | 2.235348  |
| 28 HYDROGEN | 1.323238  | 1.821129  | 10.185959 |
| 29 HYDROGEN | -2.670589 | -0.432686 | 11.203763 |
| 30 CARBON   | 7.639117  | 7.283774  | 2.753794  |
| 31 HYDROGEN | 8.631340  | 6.017756  | 1.445923  |
| 32 HYDROGEN | 8.324127  | 9.192003  | 2.342320  |
| 33 CARBON   | -0.383434 | 11.725757 | 4.770494  |
| 34 HYDROGEN | -0.799036 | 13.227402 | 3.401203  |
| 35 HYDROGEN | -1.218886 | 12.274620 | 6.590593  |
| 36 CARBON   | 8.363560  | 6.701673  | 5.494801  |
| 37 OXYGEN   | 6.770144  | 6.980319  | 7.223490  |
| 38 NITROGEN | 10.730852 | 5.974418  | 5.908122  |
| 39 HYDROGEN | 11.891574 | 5.576390  | 4.424269  |
| 40 CARBON   | 2.428084  | 11.084994 | 9.611068  |
| 41 OXYGEN   | 2.145841  | 8.744734  | 9.470461  |
| 42 NITROGEN | 1.888157  | 12.390205 | 11.701308 |
| 43 HYDROGEN | 2.033208  | 14.296742 | 11.627218 |
| 44 CARBON   | -1.704677 | 9.268134  | 4.054129  |
| 45 OXYGEN   | -0.745099 | 7.188167  | 4.604680  |
| 46 NITROGEN | -3.946530 | 9.437486  | 2.905252  |
| 47 HYDROGEN | -4.604447 | 11.160048 | 2.402756  |
| 48 CARBON   | -4.851030 | -1.169175 | 2.852756  |
| 49 HYDROGEN | -4.408792 | -0.832883 | 0.876318  |
| 50 CARBON   | -7.005907 | -2.434894 | 3.561939  |
| 51 HYDROGEN | -8.326038 | -3.157863 | 2.169285  |

|    |            |           |           |           |
|----|------------|-----------|-----------|-----------|
| 52 | NITROGEN   | -5.984192 | -2.044302 | 7.997868  |
| 53 | CARBON     | -7.491076 | -2.820065 | 6.172682  |
| 54 | HYDROGEN   | -9.194978 | -3.814663 | 6.753122  |
| 55 | CARBON     | 11.746206 | 5.243488  | 8.374418  |
| 56 | HYDROGEN   | 10.204742 | 4.963120  | 9.710686  |
| 57 | HYDROGEN   | 13.000464 | 6.719321  | 9.104720  |
| 58 | CARBON     | 0.283462  | 11.348610 | 13.691937 |
| 59 | HYDROGEN   | 0.577168  | 9.311471  | 13.782922 |
| 60 | HYDROGEN   | 0.758472  | 12.187346 | 15.514265 |
| 61 | CARBON     | -5.299828 | 7.217450  | 1.989599  |
| 62 | HYDROGEN   | -4.937919 | 5.640496  | 3.270128  |
| 63 | HYDROGEN   | -7.325264 | 7.611045  | 1.960132  |
| 64 | PHOSPHORUS | -3.040700 | 12.016089 | 12.838324 |
| 65 | OXYGEN     | -3.508790 | 11.672990 | 10.073827 |
| 66 | OXYGEN     | -4.767501 | 10.371368 | 14.698127 |
| 67 | OXYGEN     | -3.260946 | 14.819048 | 13.949390 |
| 68 | PHOSPHORUS | 13.601856 | 2.338944  | 7.849470  |
| 69 | OXYGEN     | 11.557144 | 0.227096  | 8.590756  |
| 70 | OXYGEN     | 14.609662 | 2.365276  | 5.221259  |
| 71 | OXYGEN     | 15.617196 | 2.161096  | 10.092285 |
| 72 | PHOSPHORUS | -4.140492 | 6.332503  | -1.176224 |
| 73 | OXYGEN     | -1.332912 | 6.278990  | -1.351523 |
| 74 | OXYGEN     | -5.363192 | 3.636052  | -1.826028 |
| 75 | OXYGEN     | -5.558611 | 8.430444  | -2.860328 |
| 76 | CARBON     | -8.034583 | 3.230420  | -2.295668 |
| 77 | HYDROGEN   | -8.161006 | 1.725968  | -3.696440 |
| 78 | HYDROGEN   | -8.951077 | 2.630297  | -0.545521 |
| 79 | HYDROGEN   | -8.929838 | 4.939105  | -3.028082 |
| 80 | CARBON     | -4.850574 | 8.813373  | -5.490023 |
| 81 | HYDROGEN   | -2.804377 | 9.014886  | -5.652814 |
| 82 | HYDROGEN   | -5.497684 | 7.225175  | -6.638872 |
| 83 | HYDROGEN   | -5.795039 | 10.540514 | -6.089577 |
| 84 | CARBON     | 12.295554 | -2.420432 | 8.636307  |
| 85 | HYDROGEN   | 10.585717 | -3.482909 | 9.064927  |
| 86 | HYDROGEN   | 13.040465 | -2.989304 | 6.797280  |
| 87 | HYDROGEN   | 13.704069 | -2.726856 | 10.112026 |
| 88 | CARBON     | 18.273377 | 2.772016  | 9.733210  |
| 89 | HYDROGEN   | 19.325438 | 1.536416  | 10.999774 |
| 90 | HYDROGEN   | 18.831953 | 2.446416  | 7.775942  |
| 91 | HYDROGEN   | 18.592529 | 4.743576  | 10.255690 |
| 92 | CARBON     | -5.659193 | 16.159260 | 13.975212 |
| 93 | HYDROGEN   | -6.450380 | 16.249561 | 12.070557 |
| 94 | HYDROGEN   | -6.967767 | 15.214889 | 15.259637 |
| 95 | HYDROGEN   | -5.241871 | 18.054613 | 14.658761 |
| 96 | CARBON     | -5.993110 | 8.052997  | 13.902925 |
| 97 | HYDROGEN   | -6.684497 | 8.230306  | 11.968820 |
| 98 | HYDROGEN   | -4.666242 | 6.476212  | 14.043911 |
| 99 | HYDROGEN   | -7.559795 | 7.760360  | 15.205624 |



### 4.3. IR-studies

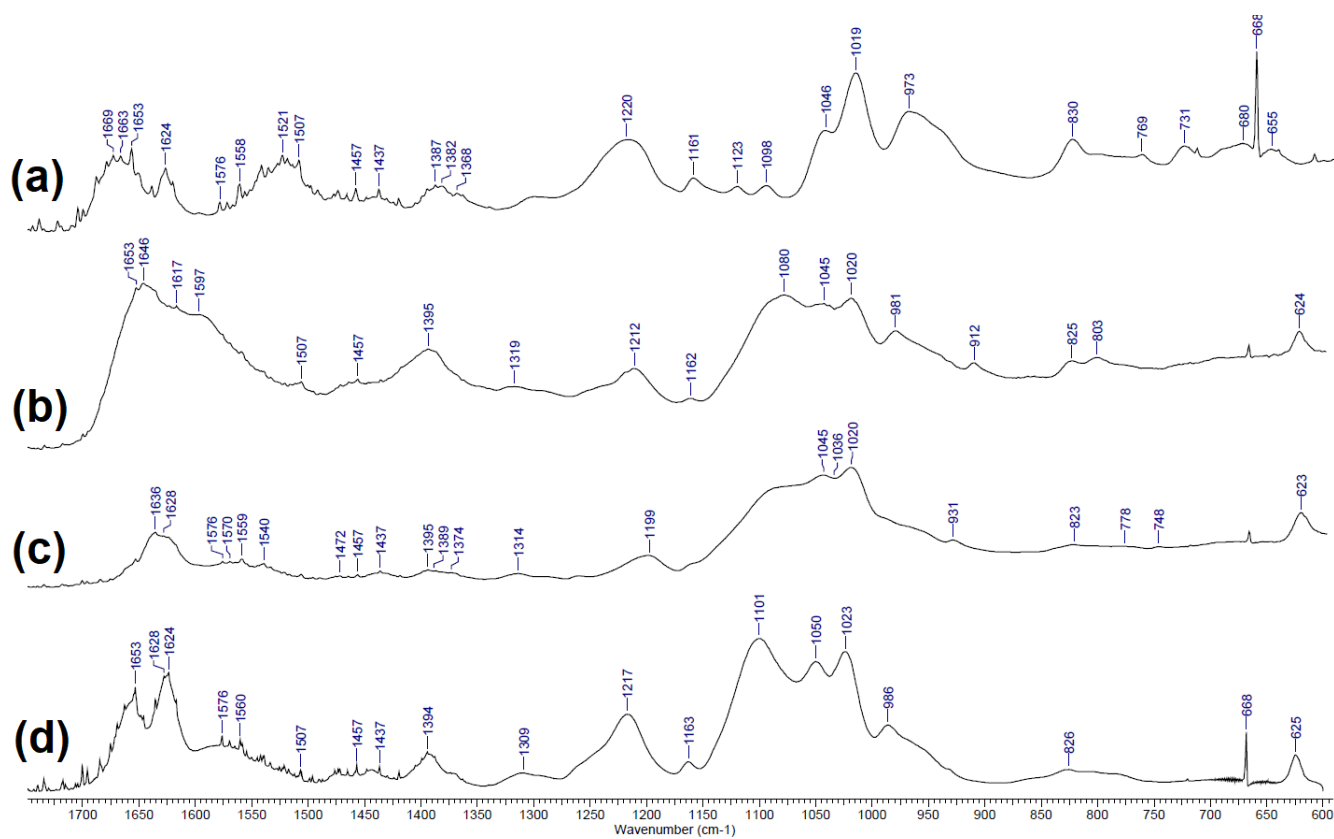

**Figure S71.** FT-IR-spectra (neat, ZnSe) of **6** (a), [Hg(**6**)](ClO<sub>4</sub>)<sub>2</sub> (b), [Zn(**6**)](ClO<sub>4</sub>)<sub>2</sub> (c) and [Cu(**6**)](ClO<sub>4</sub>)<sub>2</sub> (d).

#### 4.4. ESI-spectra of $[\text{Hg}(\mathbf{6})]^{2+}$ complex

Q3LHg\_1000x\_FA\_free\_pos #1-37 RT: 0.02-0.98 AV: 37 NL: 1.08E7  
T: FTMS + c ESI Full ms [100.00-2000.00]

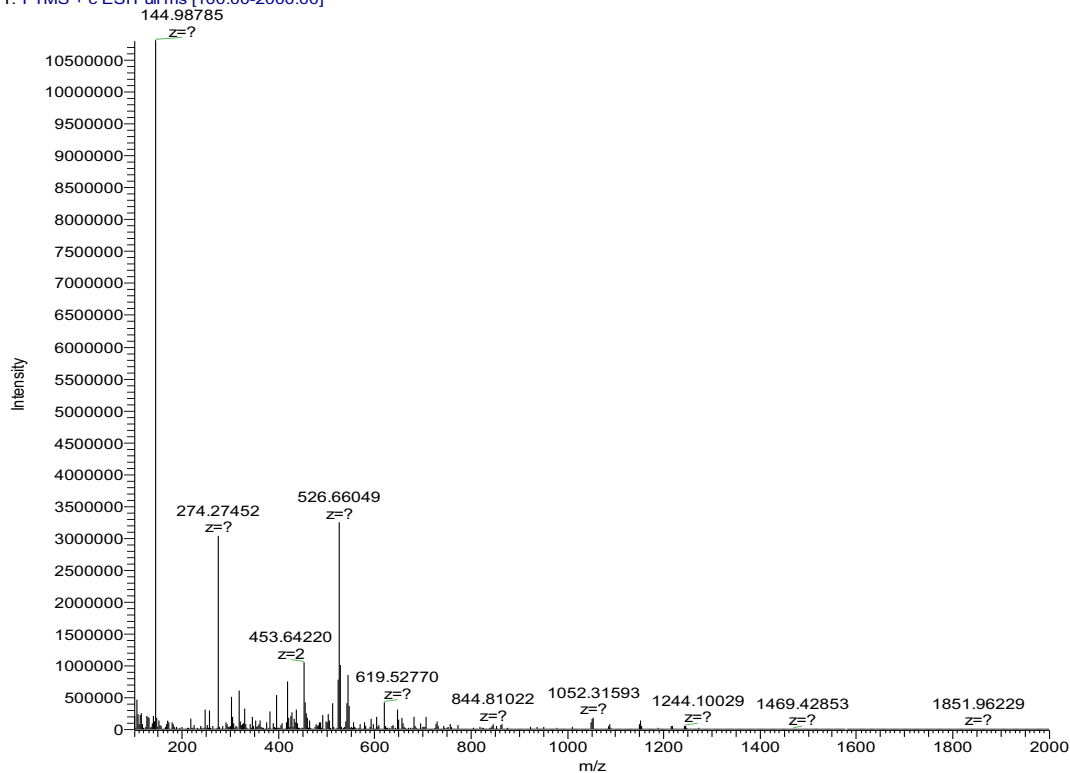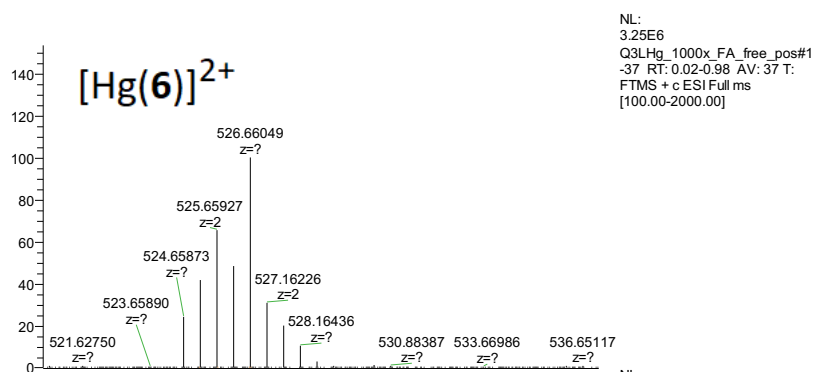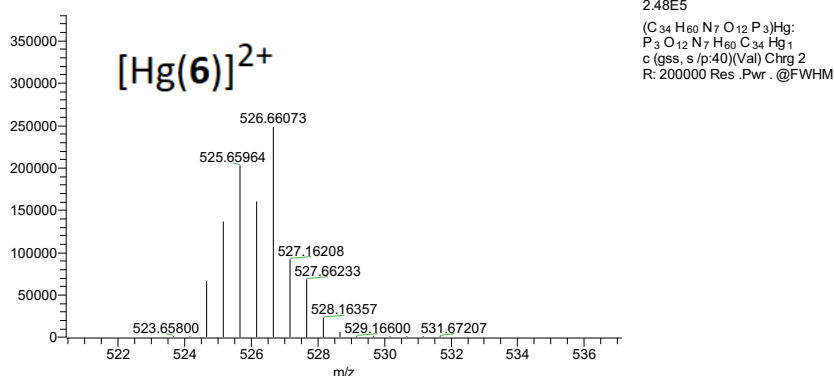

**Scheme S72.** HRMS ESI spectra of the aqueous solution of **6** and  $\text{Hg}(\text{ClO}_4)_2$  (1:1 molar ratio).

#### 4.5. NMR-studies of $[\text{Hg}(\mathbf{6})]^{2+}$ complex

##### NMR-titration of ligand **6** with Hg(II) perchlorate

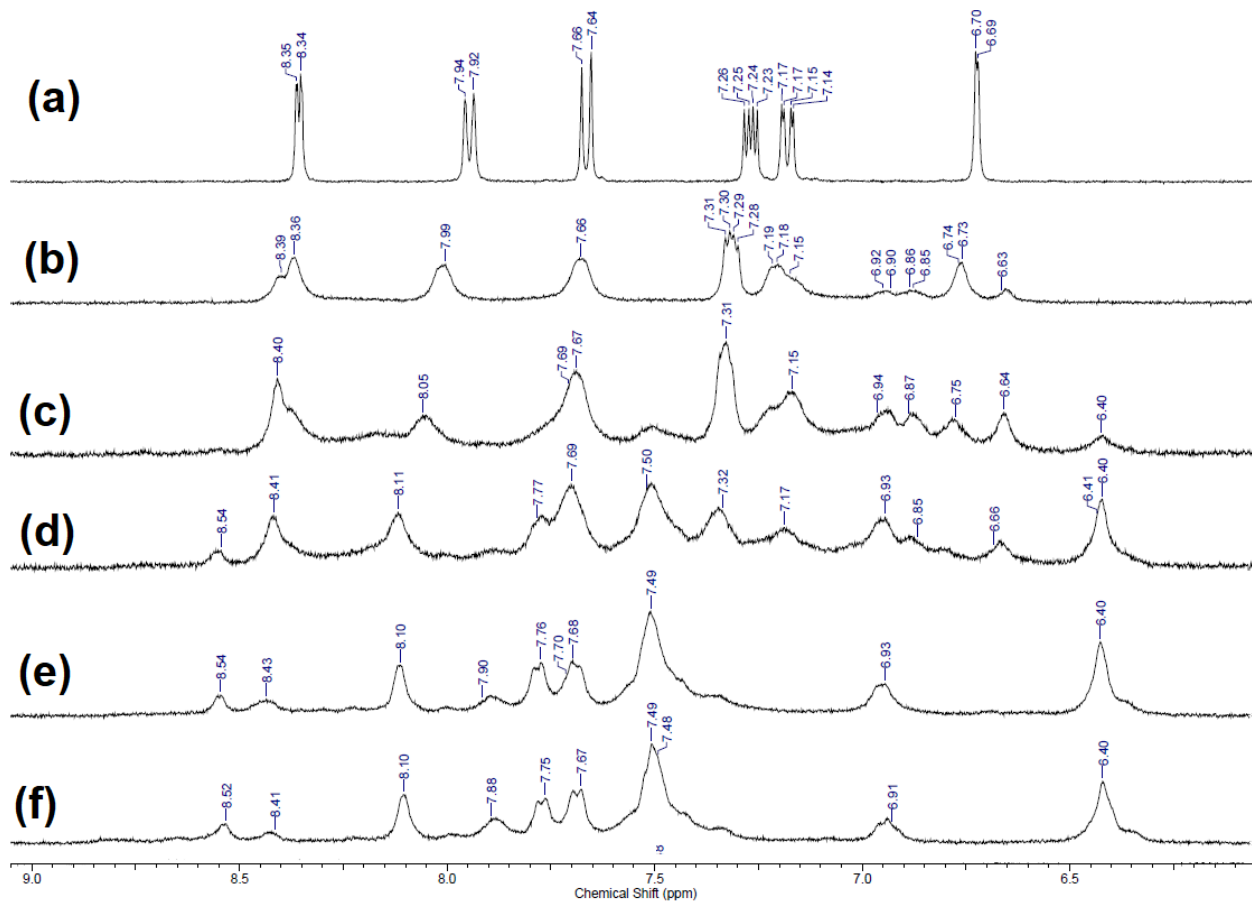

**Figure S73.** Aromatic region of  $^1\text{H}$  NMR spectra (400 MHz) of **6** in  $\text{D}_2\text{O}/\text{MeOD}$  (5:1 v/v,  $[\mathbf{6}] = 0.04$  M) at 298 K before (a) and after addition of 0.2 (b), 0.4 (c), 0.6 (d), 0.8 (e) and 1.0 (f) equiv of mercury(II) perchlorate.

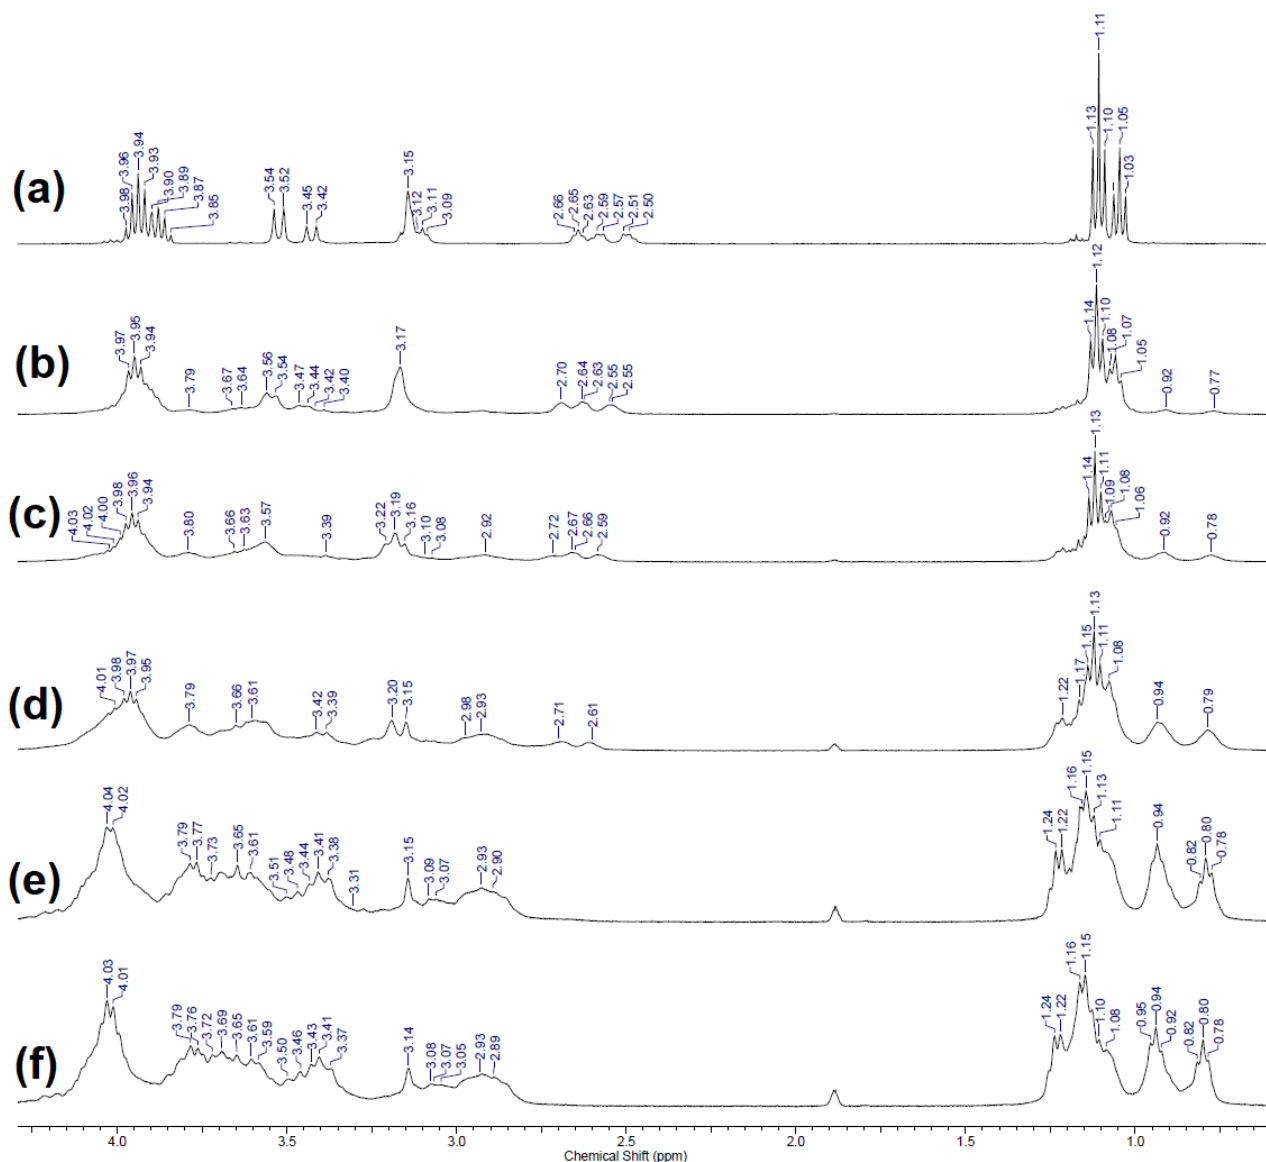

**Figure S74.** Aromatic region of  $^1\text{H}$  NMR spectra (400 MHz) of **6** in  $\text{D}_2\text{O}/\text{MeOD}$  (5:1 v/v,  $[\mathbf{6}] = 0.04 \text{ M}$ ) at 298 K before (a) and after addition of 0.2 (b), 0.4 (c), 0.6 (d), 0.8 (e) and 1.0 (f) equiv of mercury(II) perchlorate.

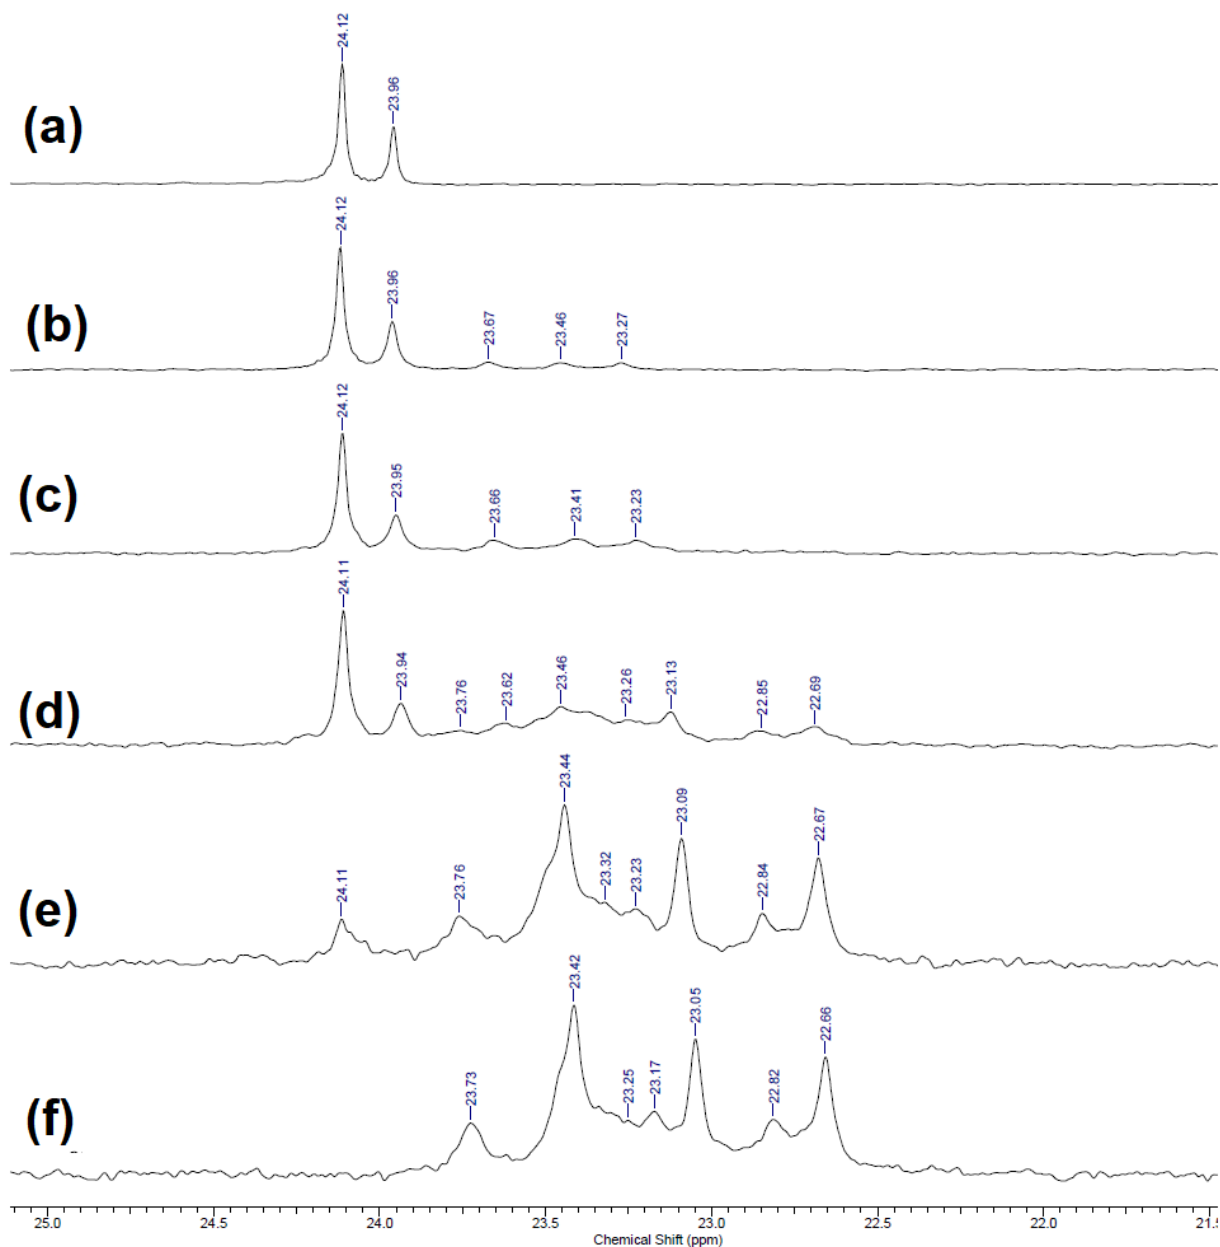

**Figure S75.** 162.5 MHz  $^{31}\text{P}$  NMR spectra of **6** in  $\text{D}_2\text{O}/\text{MeOD}$  (5:1 v/v,  $[\textbf{6}] = 0.04 \text{ M}$ ) at 298 K before (a) and after addition of 0.2 (b), 0.4 (c), 0.6 (d), 0.8 (e) and 1.0 (f) equiv of mercury(II) perchlorate.

## 5. Detection of sulfide anions

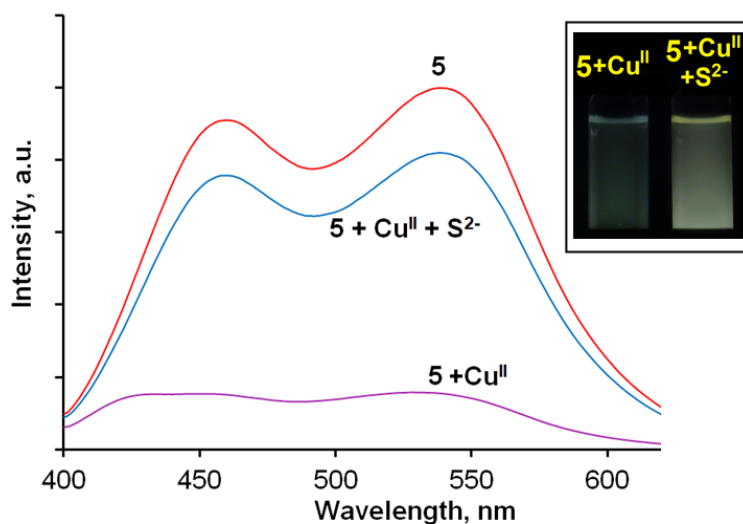

**Figure S76.** Changes in emission of an aqueous solution of ligand **5** (red line) (26.6 mM, pH = 7.4, 0.03M HEPES,  $\lambda_{\text{ex}} = 356$  nm) after addition of Cu<sup>II</sup> ions (1 equiv) (rose line) followed by S<sup>2-</sup> ions (excess) (blue line). Inset: Visual detection of S<sup>2-</sup> ions (excess) under UV light ( $\lambda = 365$  nm) in the aqueous solution of ligand **5** (26.6 mM, pH = 7.4, 0.03M HEPES) and copper(II) perchlorate (1 equiv).

## 6. Characterization of compounds 5, 6, 9a-f, 10

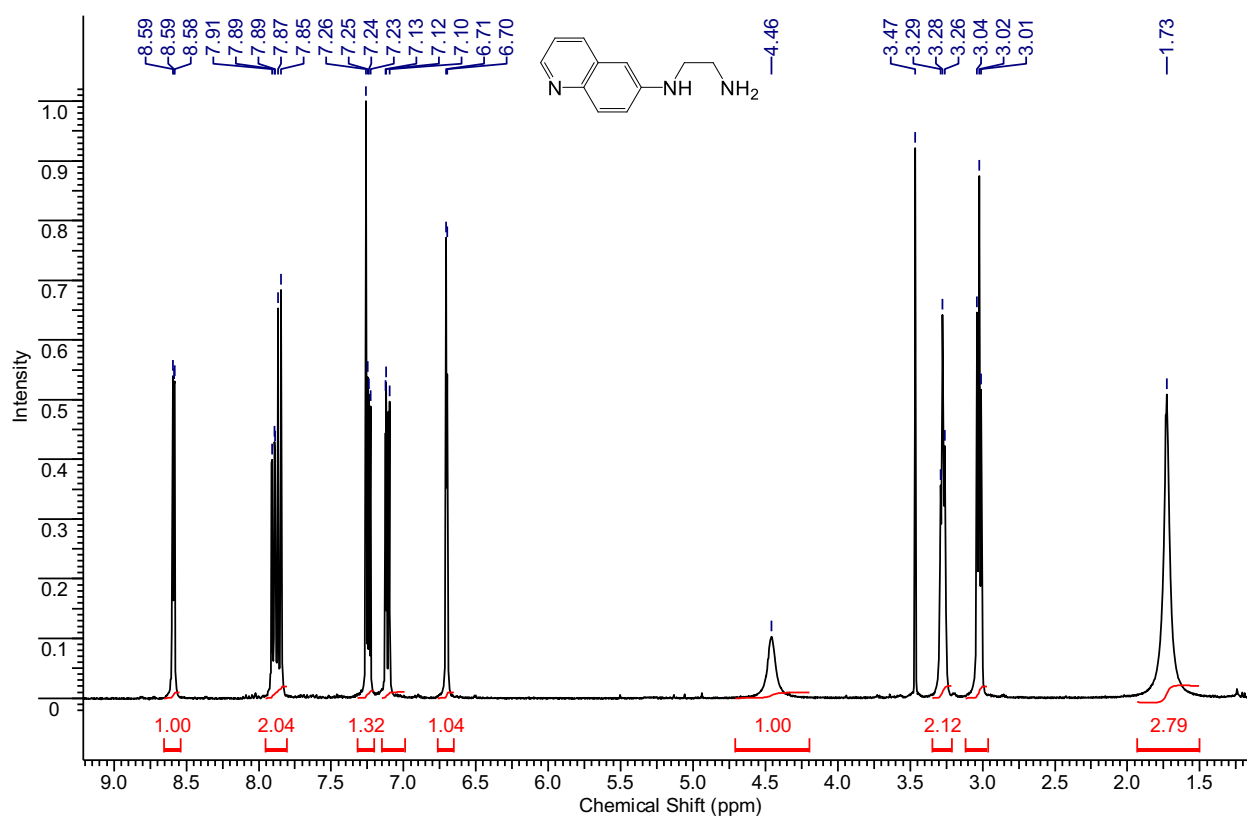

**Figure S77.** <sup>1</sup>H NMR spectrum of **9a** (CDCl<sub>3</sub>, 400MHz, 300K).

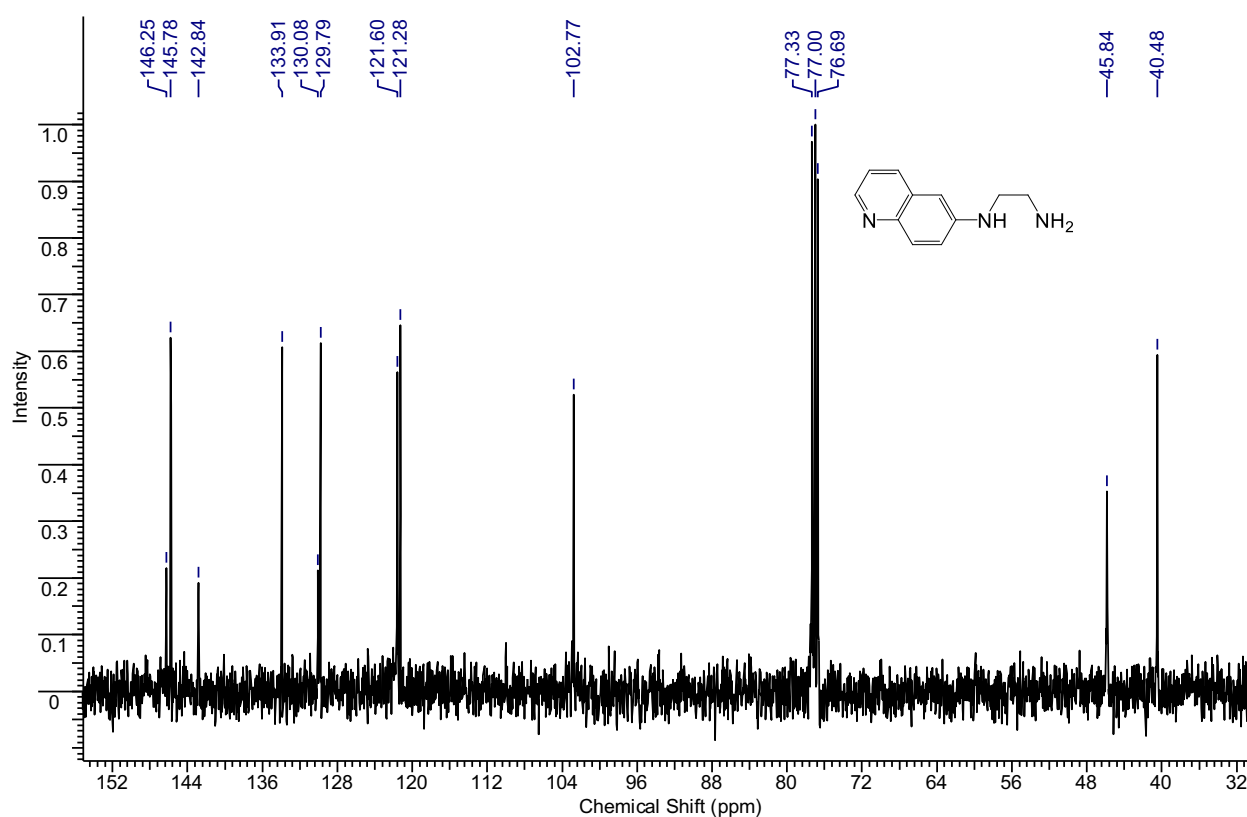

**Figure S78.** <sup>13</sup>C NMR spectrum of **9a** (CDCl<sub>3</sub>, 100.6 MHz, 300K).

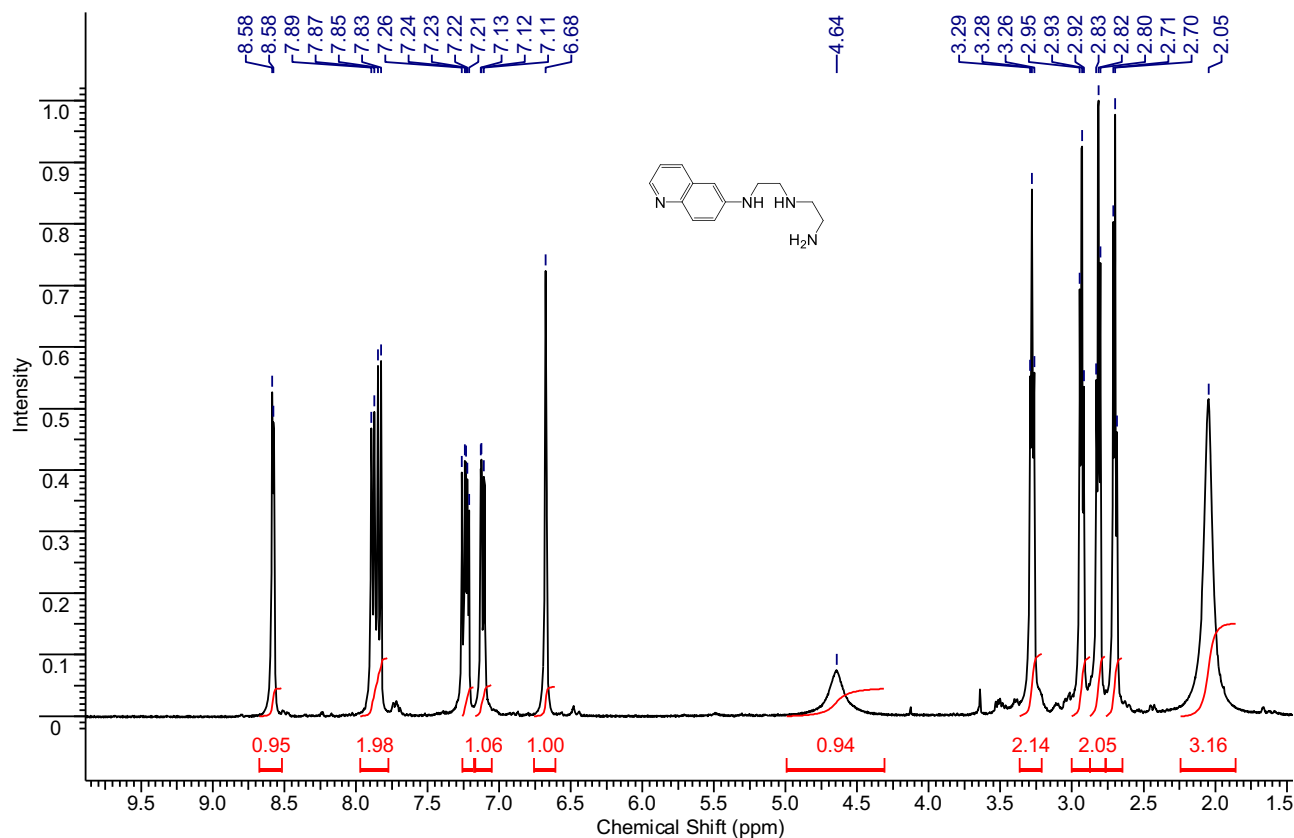

**Figure S79.**  $^1\text{H}$  NMR spectrum of **9b** ( $\text{CDCl}_3$ , 400MHz, 300K).

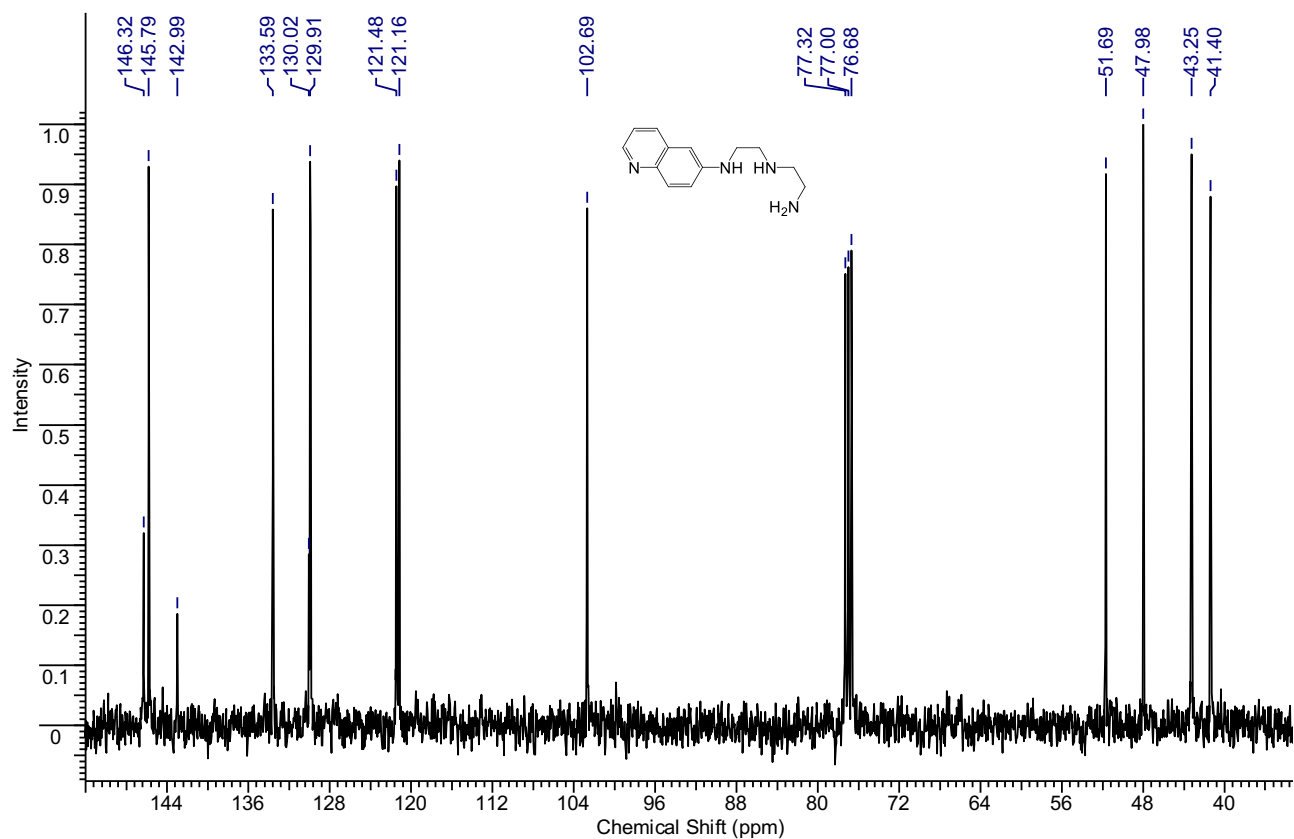

**Figure S80.**  $^{13}\text{C}$  NMR spectrum of **9b** ( $\text{CDCl}_3$ , 100.6 MHz, 300K).



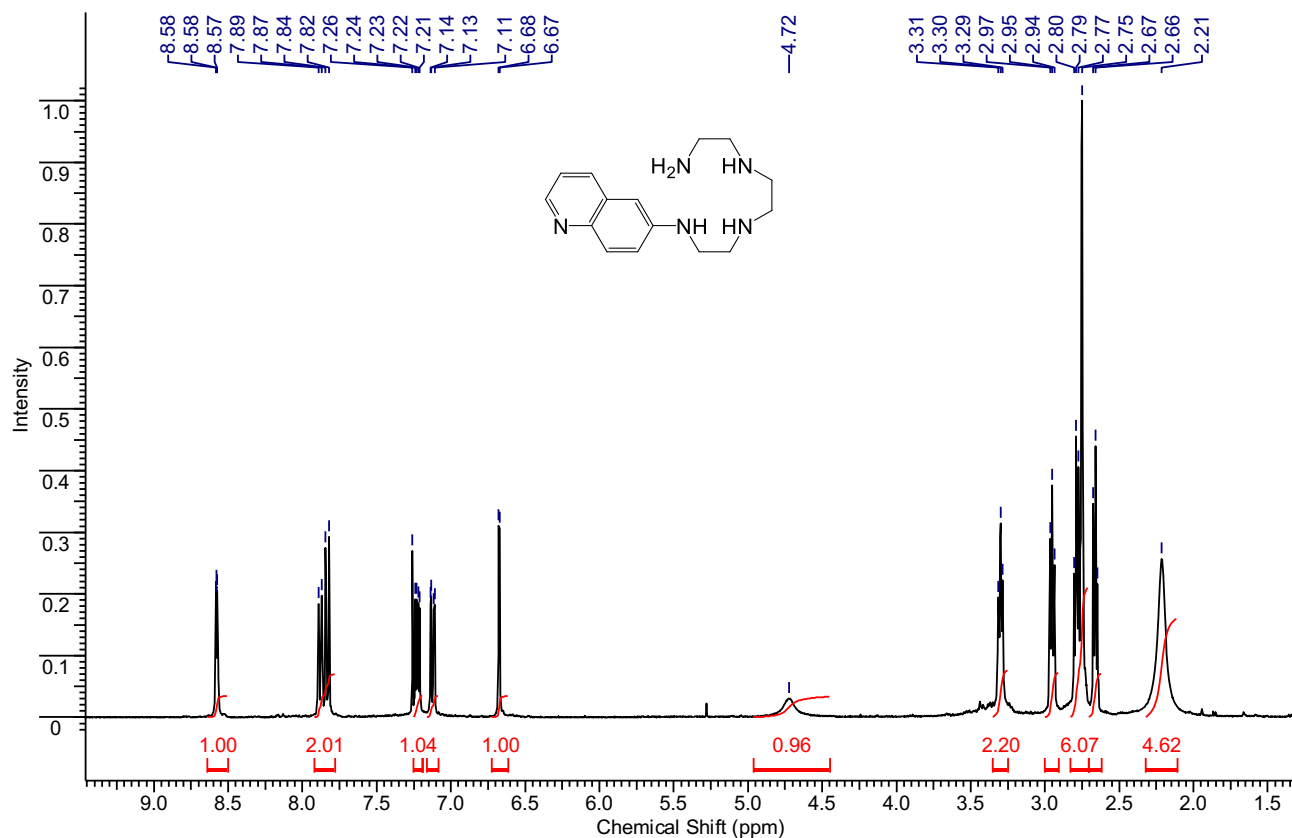

**Figure S81.** <sup>1</sup>H NMR spectrum of **9c** (CDCl<sub>3</sub>, 400MHz, 300K).

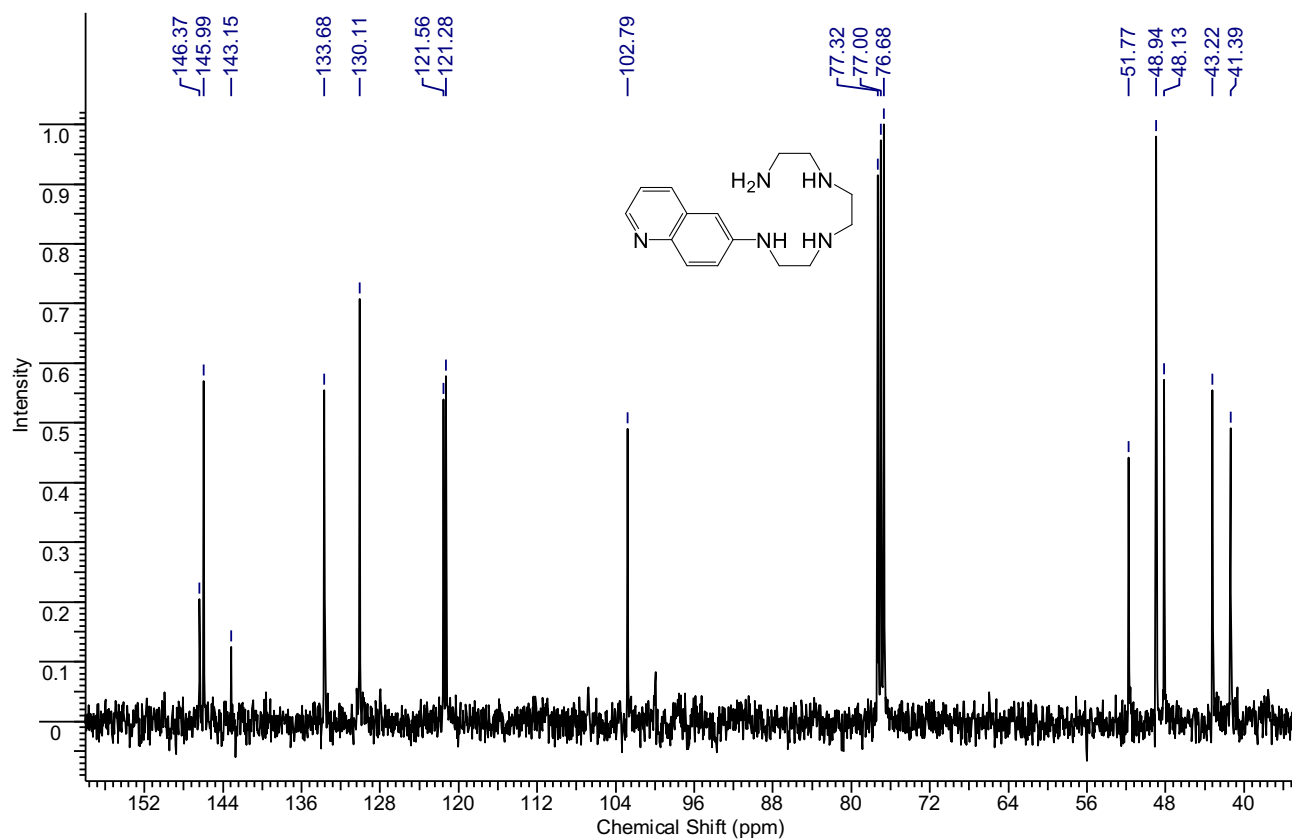

**Figure S82.** <sup>13</sup>C NMR spectrum of **9c** (CDCl<sub>3</sub>, 100.6 MHz, 300K).

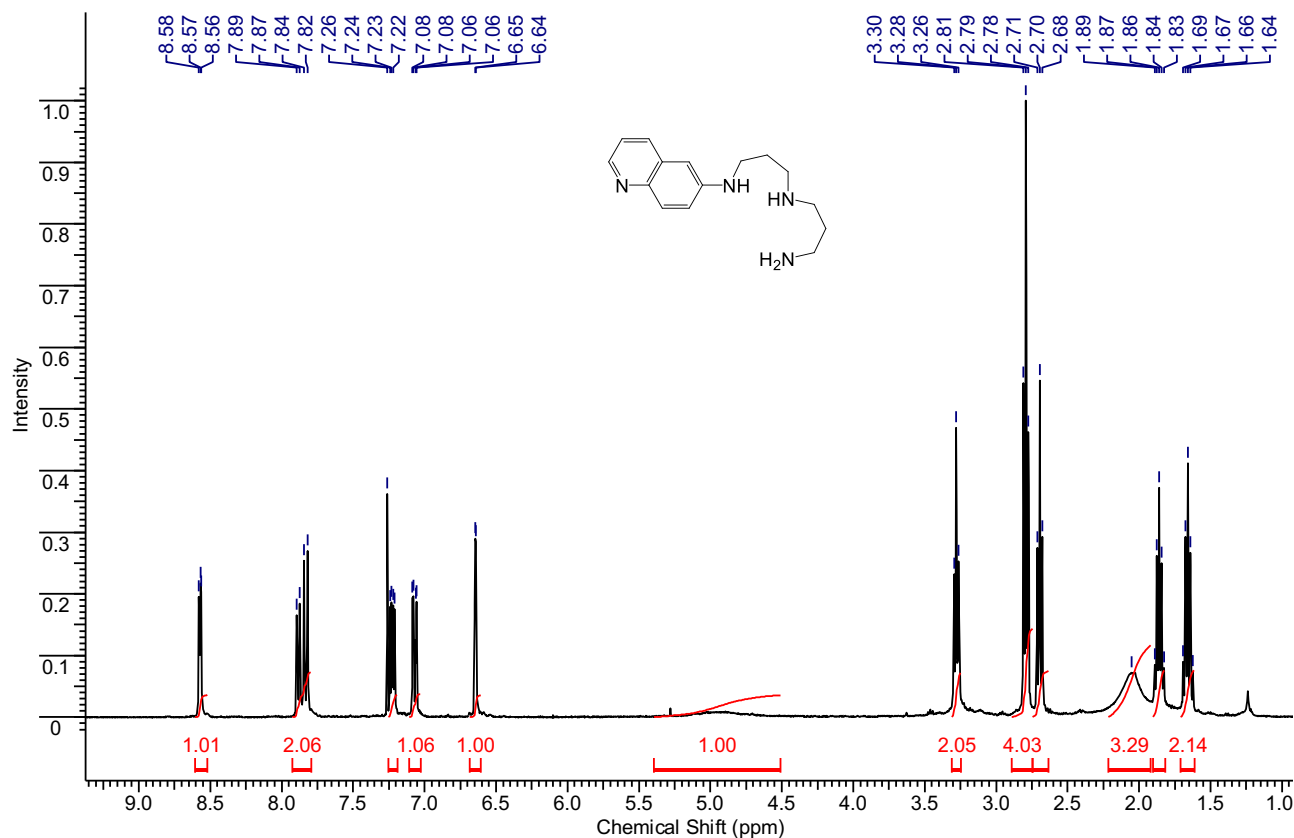

**Figure S83.**  $^1\text{H}$  NMR spectrum of **9d** ( $\text{CDCl}_3$ , 400MHz, 300K).

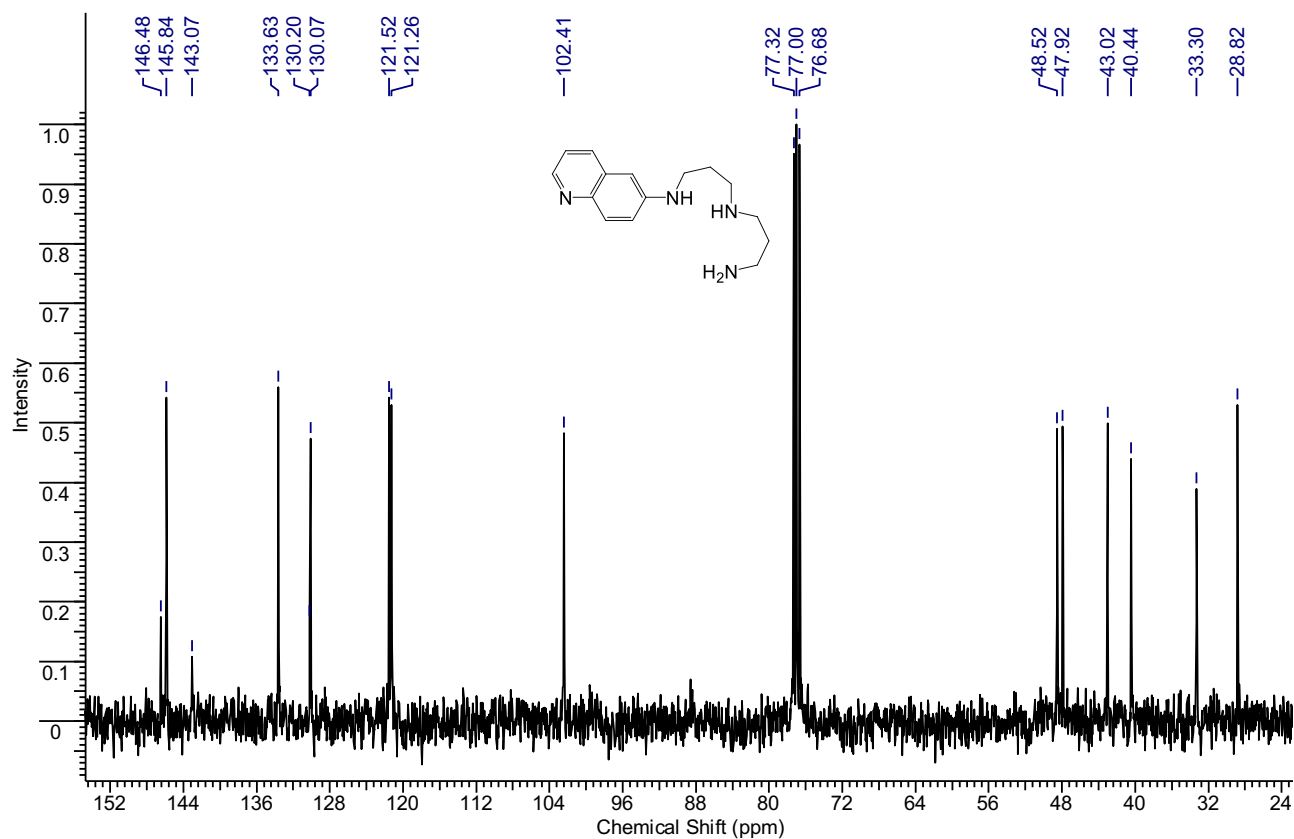

**Figure S84.**  $^{13}\text{C}$  NMR spectrum of **9d** ( $\text{CDCl}_3$ , 100.6 MHz, 300K).

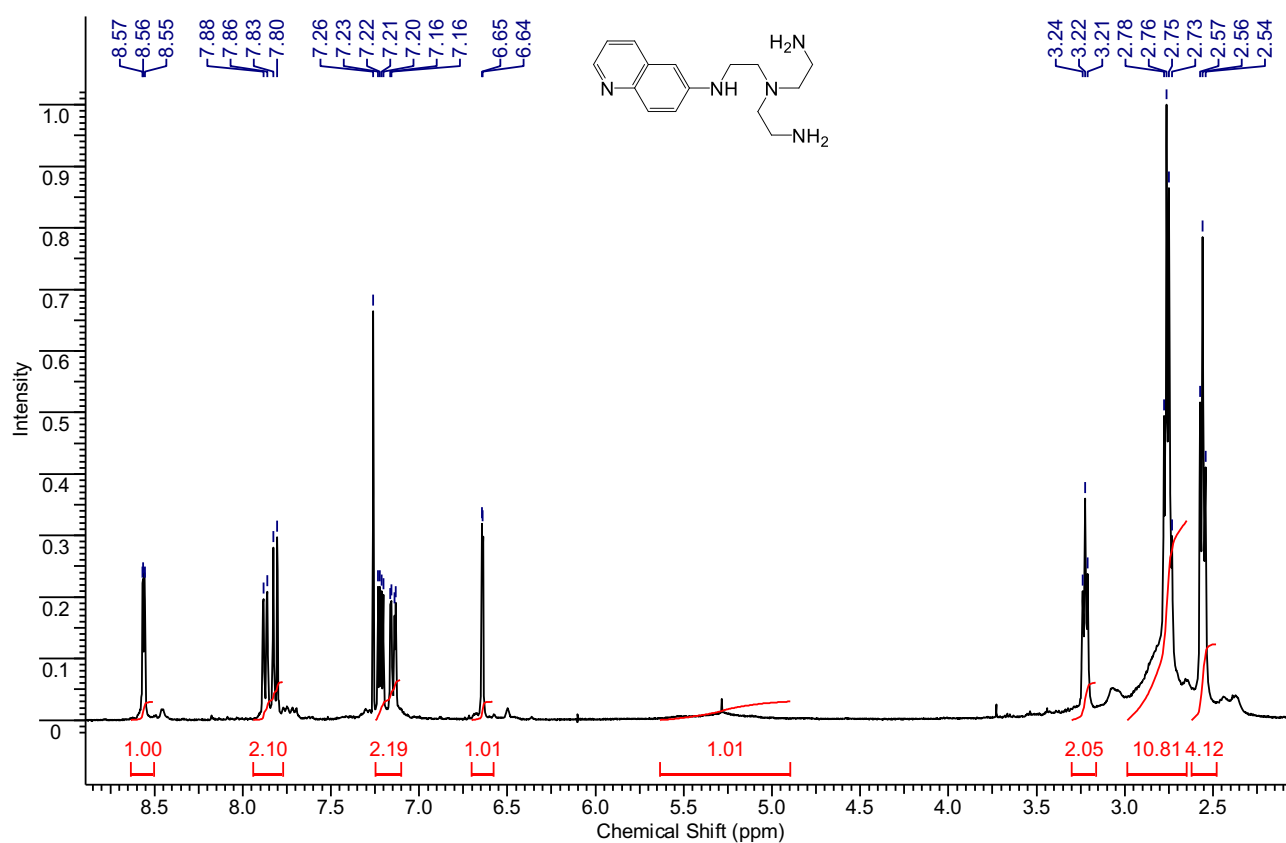

**Figure S85.** <sup>1</sup>H NMR spectrum of **9e** (CDCl<sub>3</sub>, 400MHz, 300K).

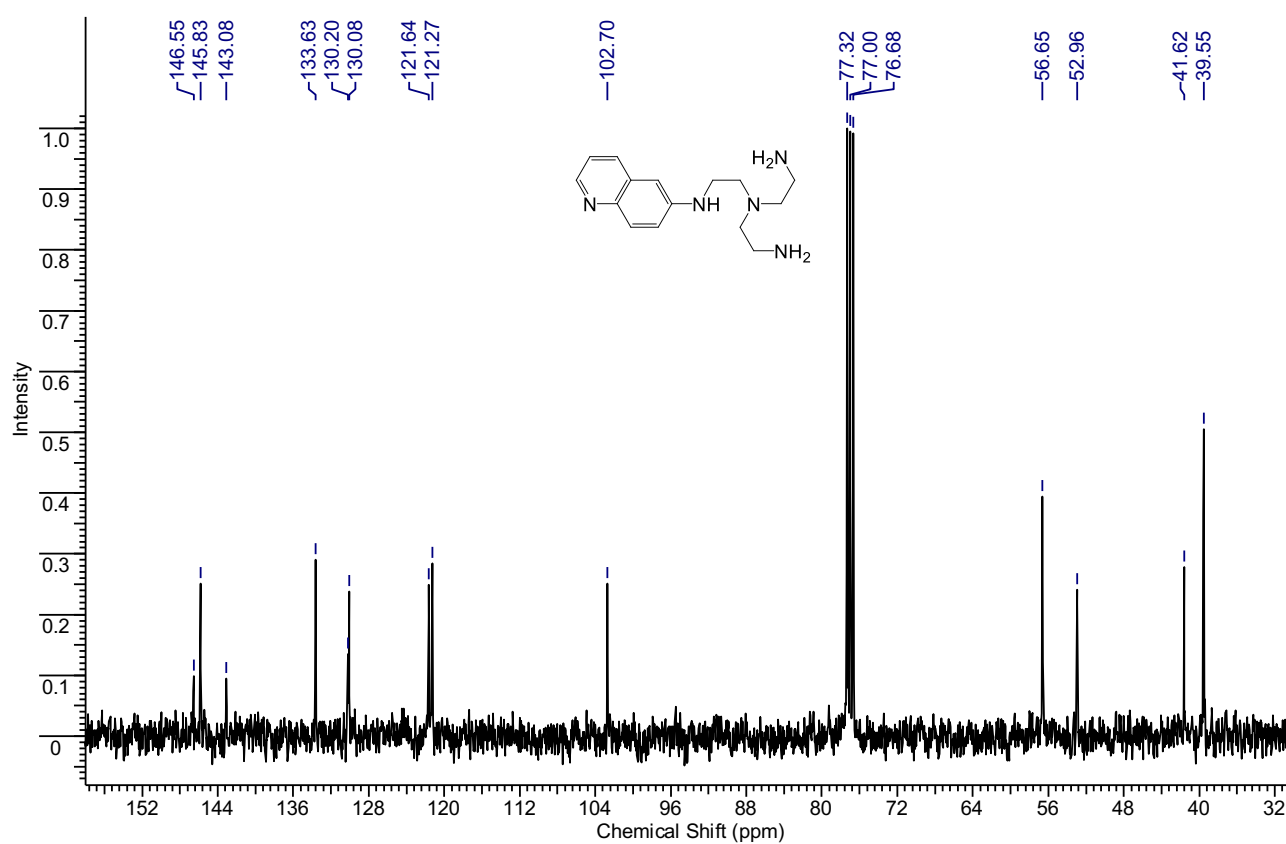

**Figure S86.** <sup>13</sup>C NMR spectrum of **9e** (CDCl<sub>3</sub>, 100.6 MHz, 300K).

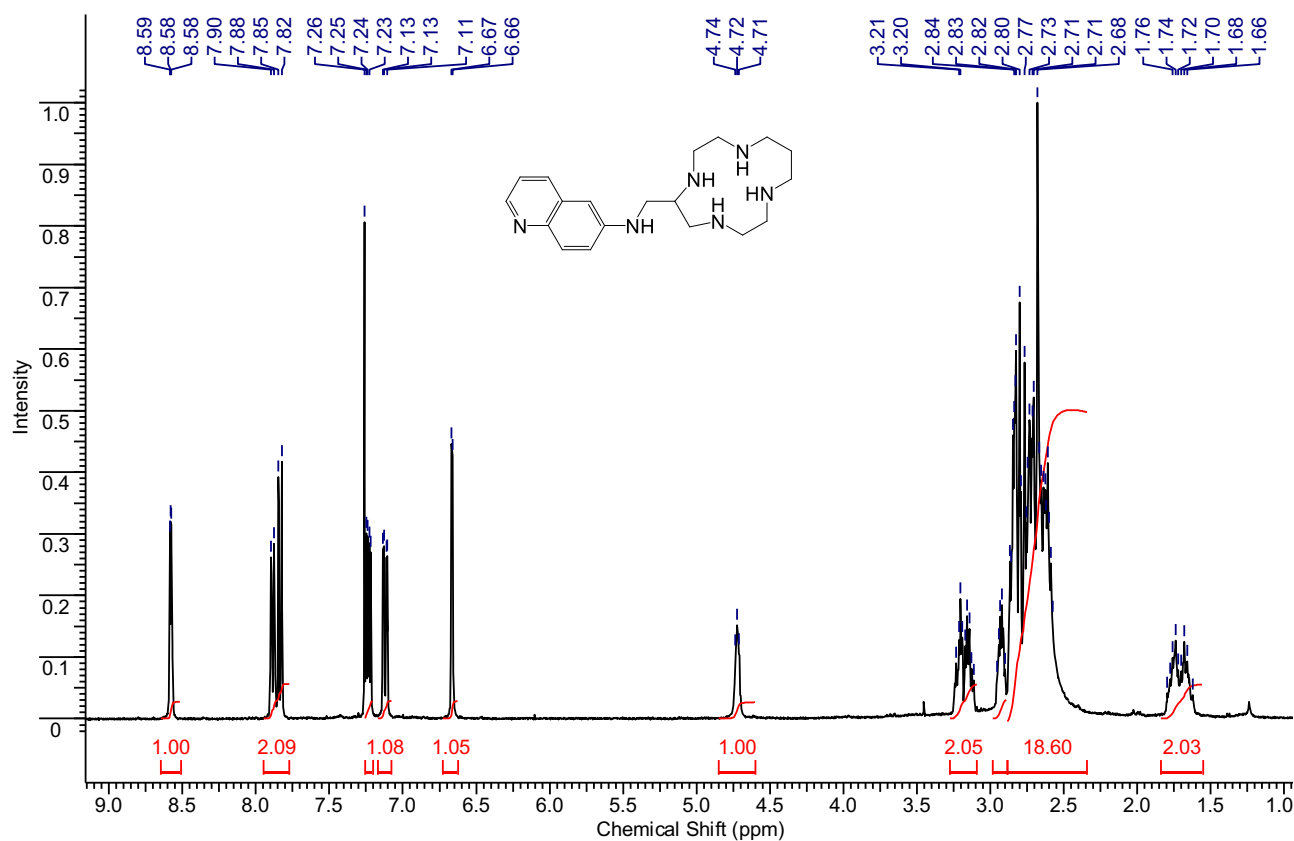

**Figure S87.** <sup>1</sup>H NMR spectrum of **9f** (CDCl<sub>3</sub>, 400MHz, 300K).

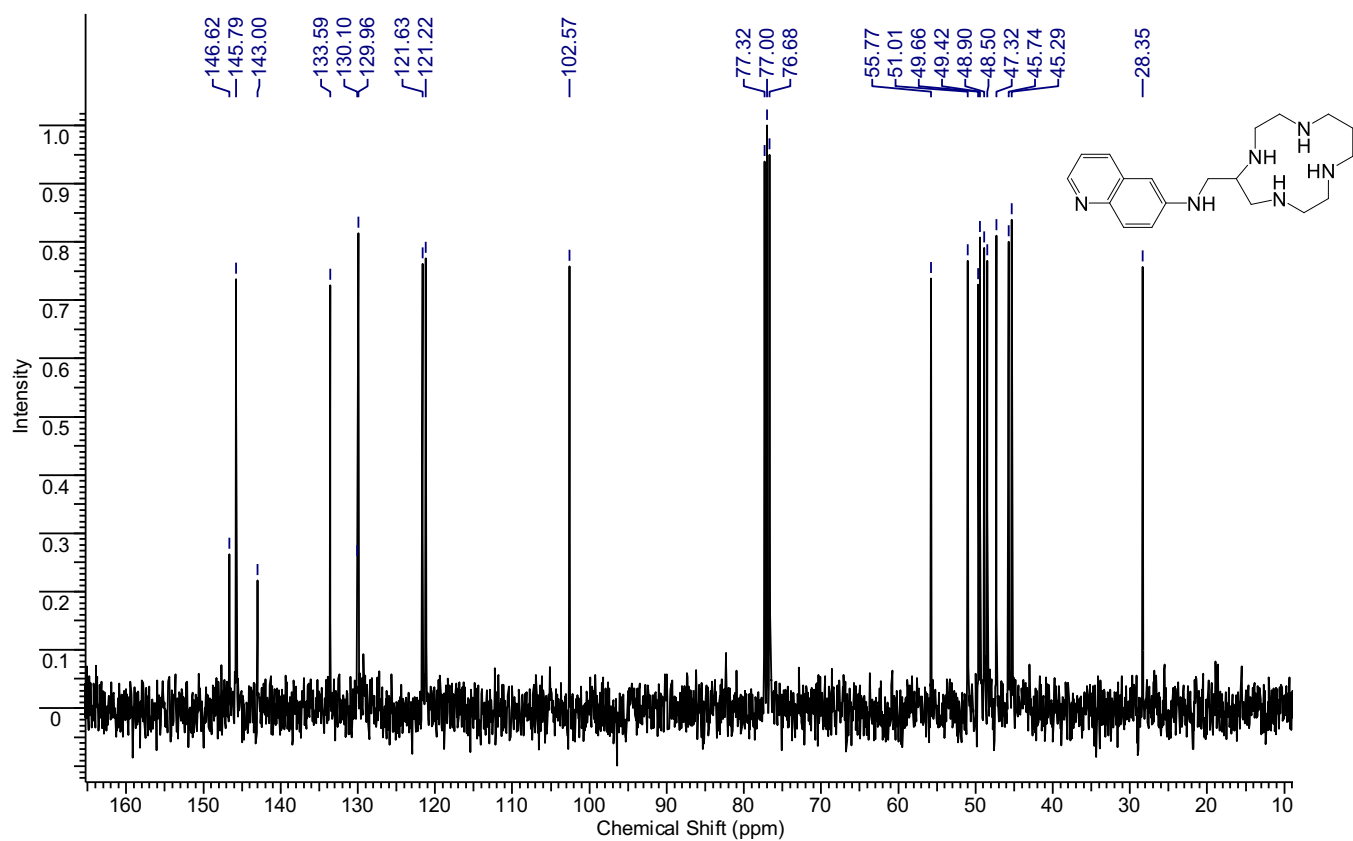

**Figure S88.** <sup>13</sup>C NMR spectrum of **9f** (CDCl<sub>3</sub>, 100.6 MHz, 300K).

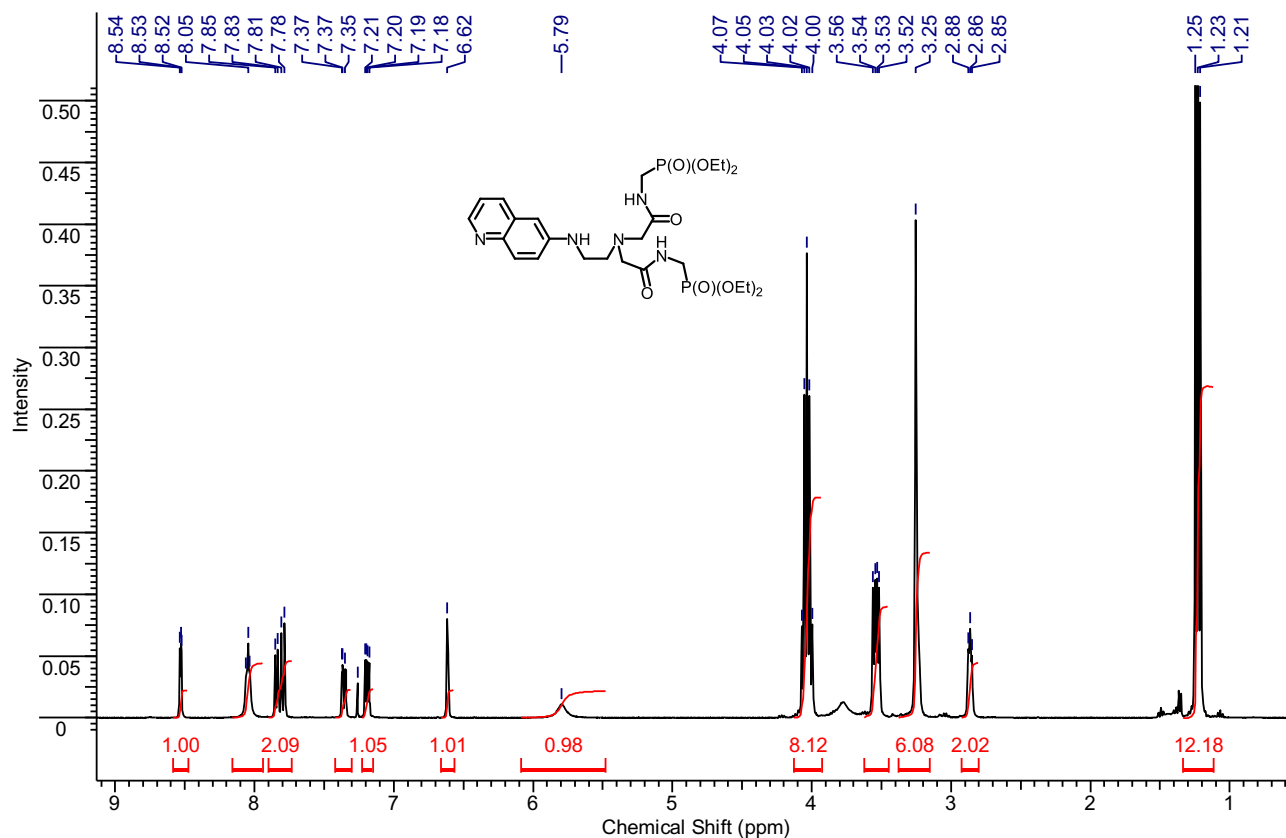

**Figure S89.**  $^1\text{H}$  NMR spectrum of **5** ( $\text{CDCl}_3$ , 400MHz, 300K).

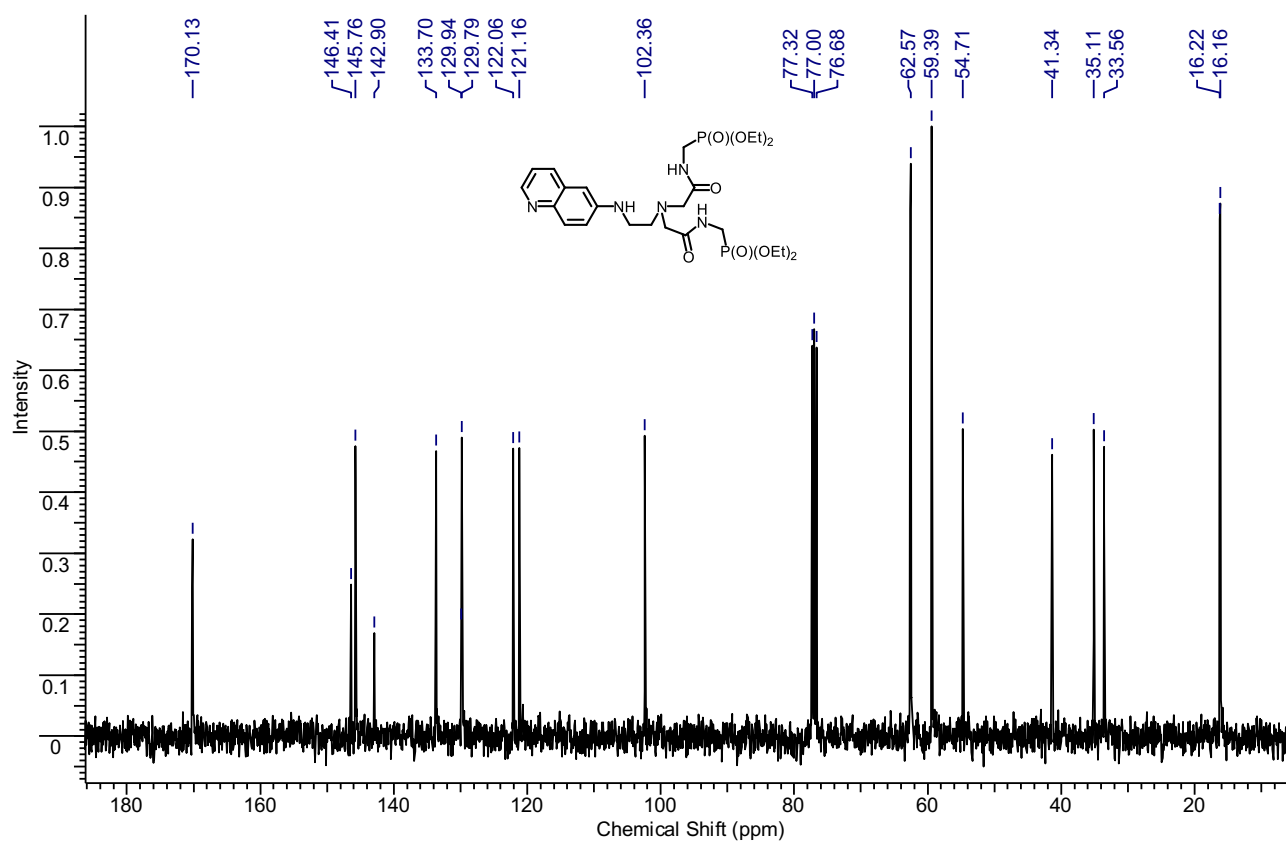

**Figure S90.**  $^{13}\text{C}$  NMR spectrum of **5** ( $\text{CDCl}_3$ , 100.6 MHz, 300K).

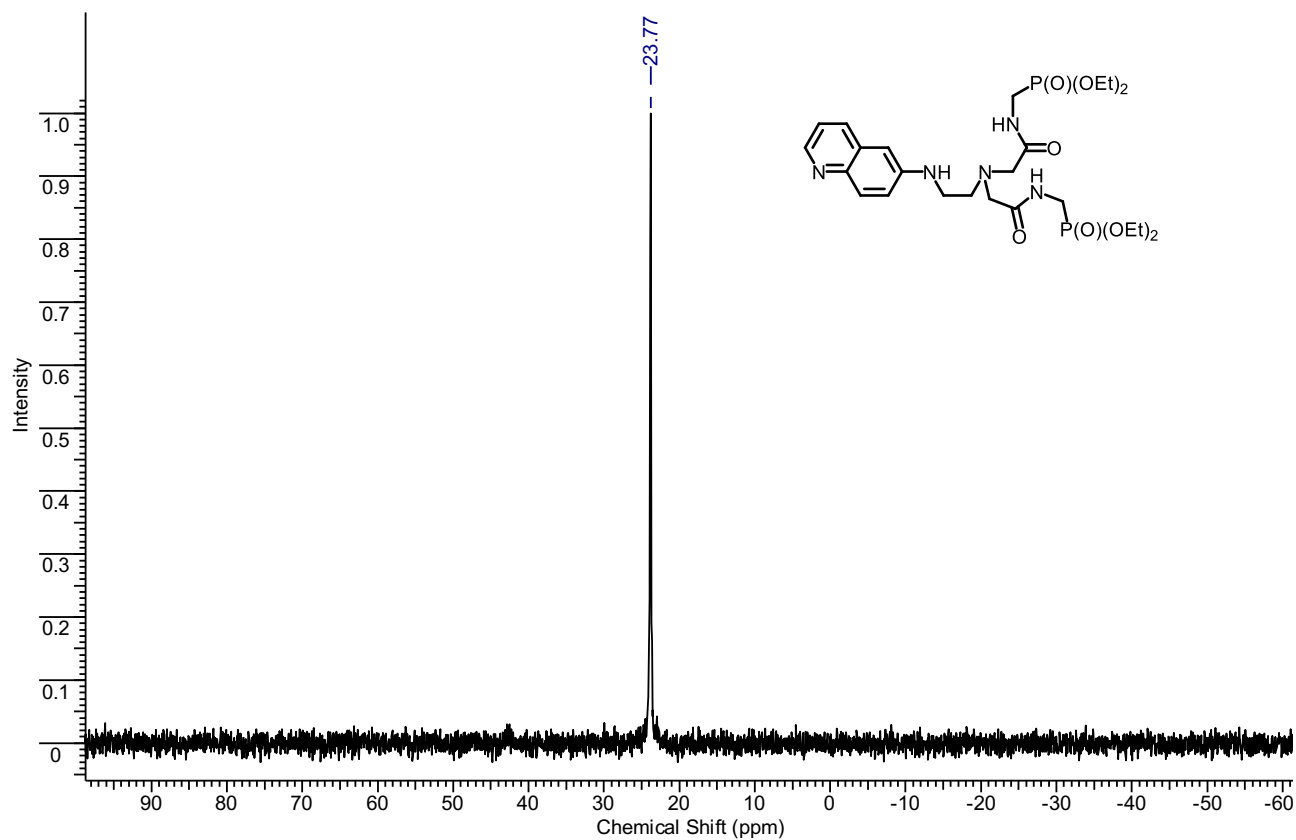

**Figure S91.**  $^{31}\text{P}$  NMR spectrum of **5** ( $\text{CDCl}_3$ , 162.5 MHz, 300K).

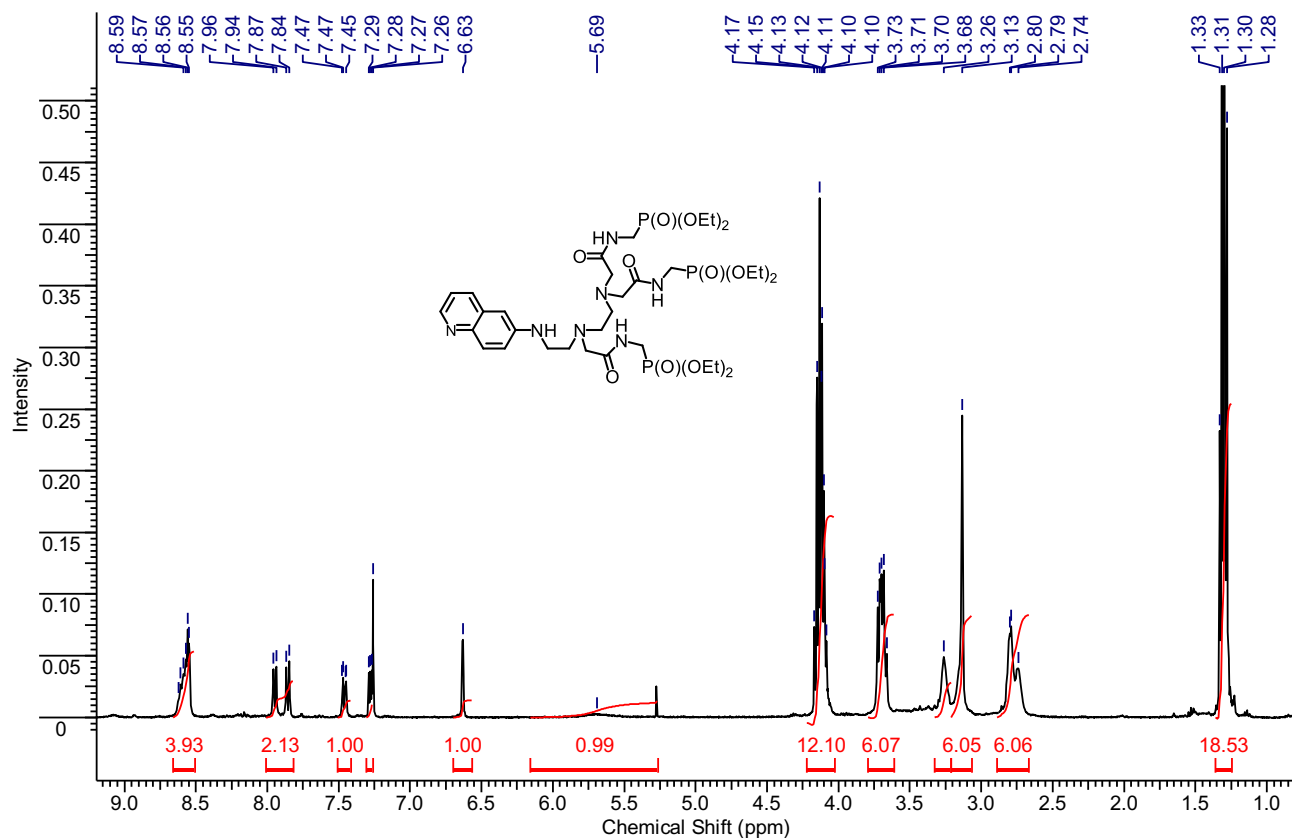

**Figure S92.**  $^1\text{H}$  NMR spectrum of **6** ( $\text{CDCl}_3$ , 400MHz, 300K).

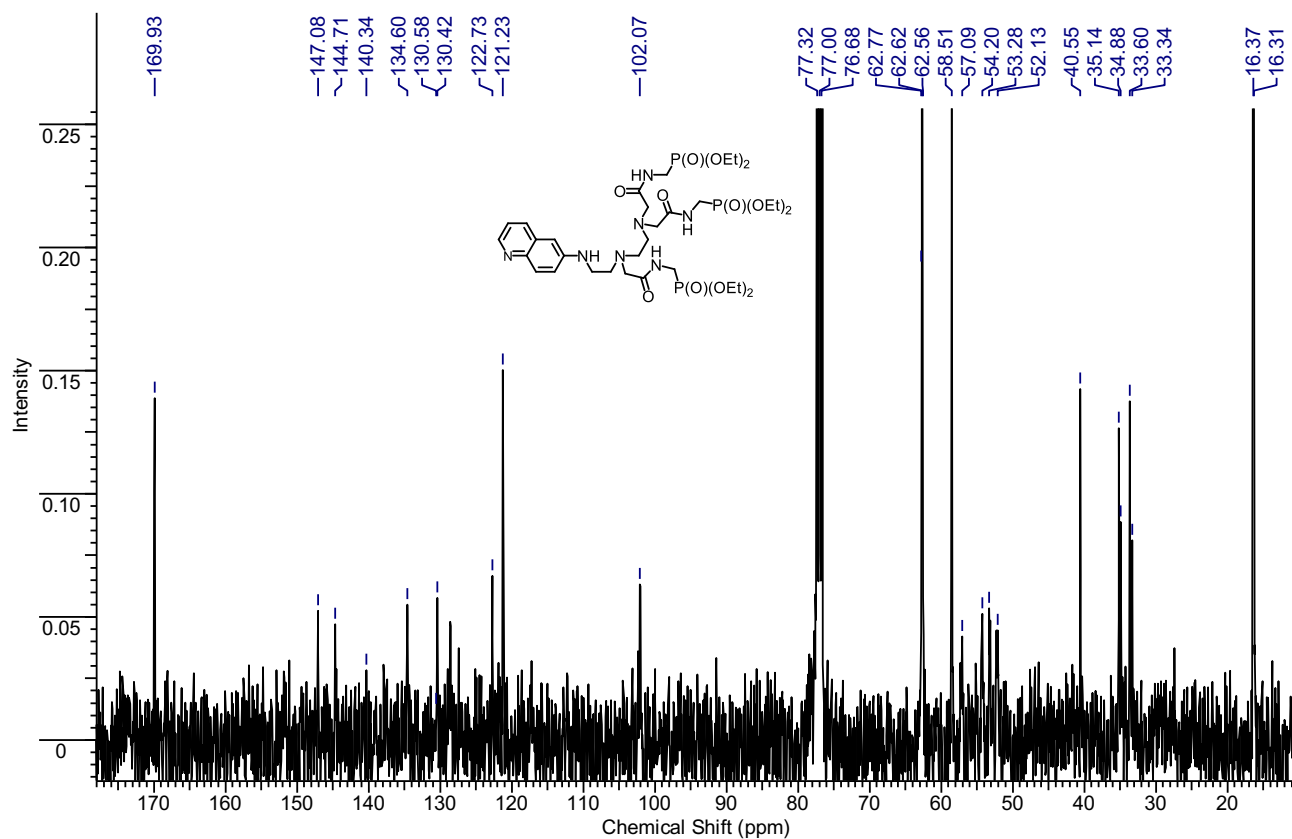

**Figure S93.**  $^{13}\text{C}$  NMR spectrum of **6** ( $\text{CDCl}_3$ , 100.6 MHz, 300K).

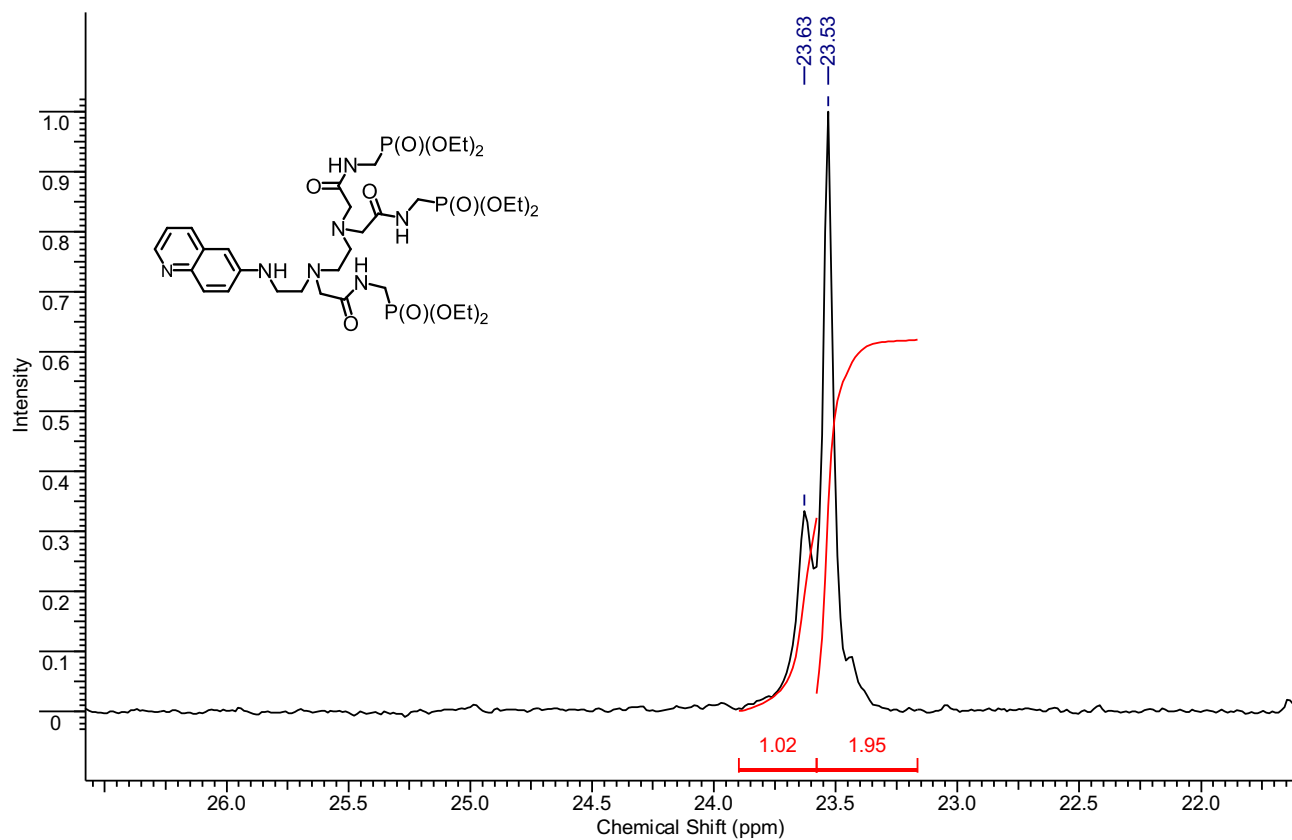

**Figure S94.**  $^{31}\text{P}$  NMR spectrum of **6** ( $\text{CDCl}_3$ , 162.5 MHz, 300K).



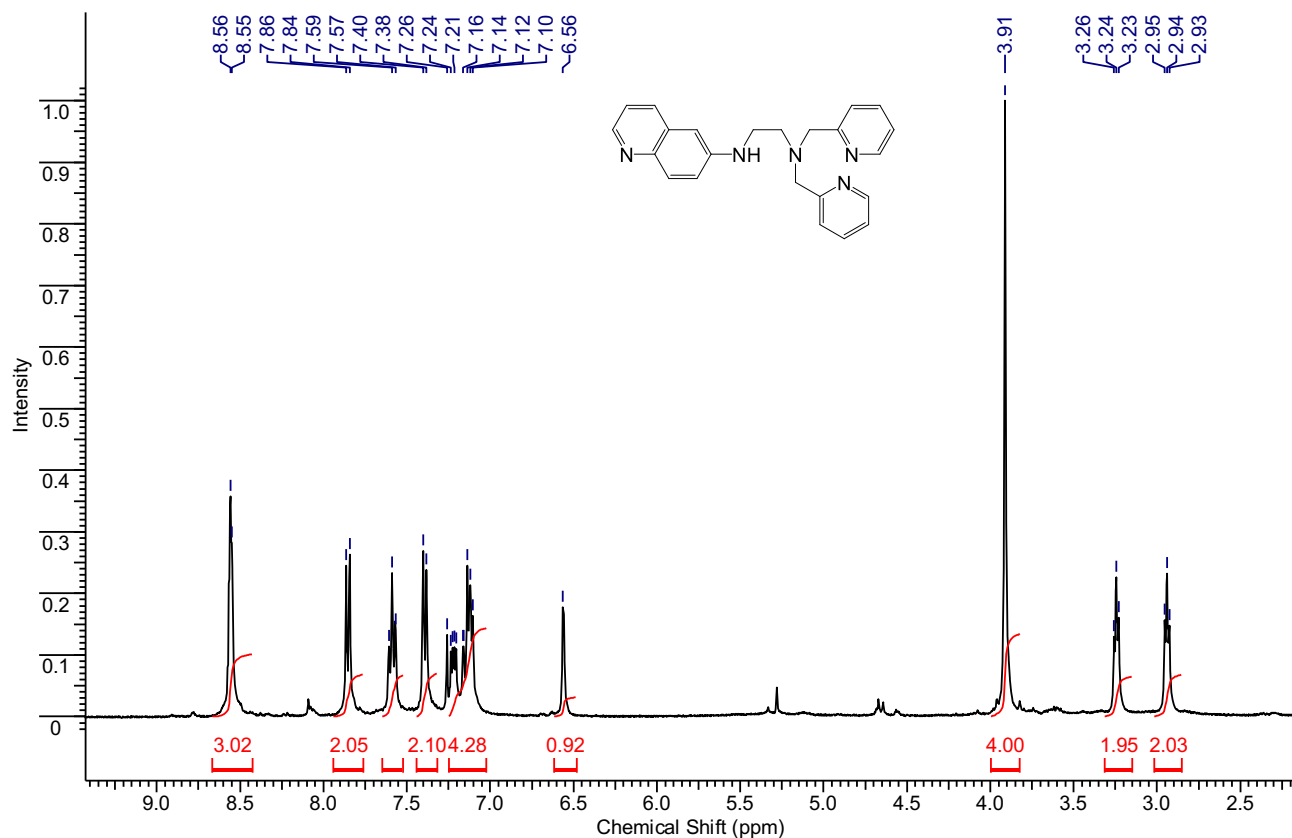

**Figure S95.**  $^1\text{H}$  NMR spectrum of **10** ( $\text{CDCl}_3$ , 400MHz, 300K).

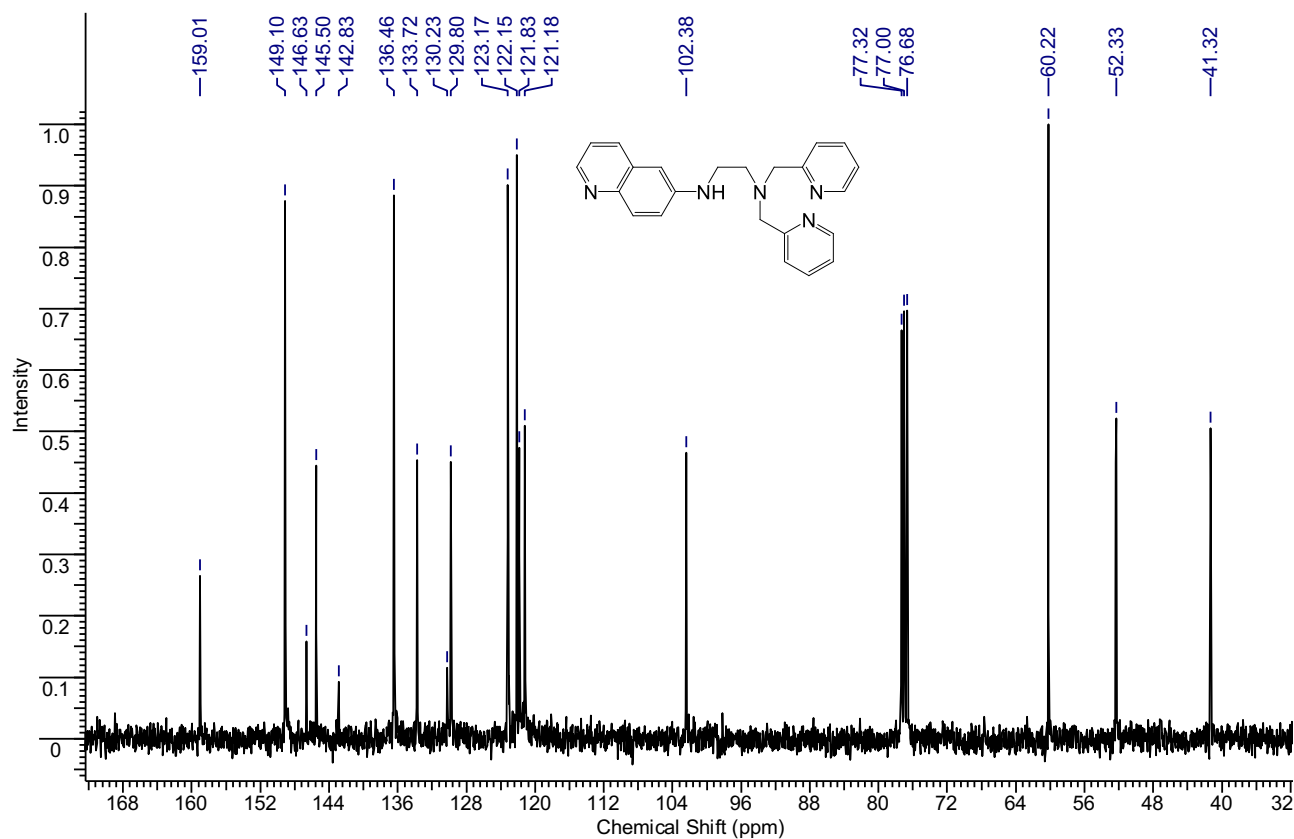

**Figure S96.**  $^{13}\text{C}$  NMR spectrum of **10** ( $\text{CDCl}_3$ , 100.6 MHz, 300K).
